# Supplementary material for: Mechanistic insights into amide formation from aryl epoxides and amines catalyzed by ruthenium pincer complexes: a DFT study
Source: Royal Society of Chemistry journal article supplement (doi:10.1039/d3dt00726j), 2023-01-01
Supplement: d3dt00726j1.pdf [file d3dt00726j1.pdf]

## Supporting Information

For

### **Mechanistic Insight of Amides Formation from Aryl Epoxides and Amines Catalyzed by Ruthenium Pincer Complexes: A DFT Study**

Jing Wen,<sup>a</sup> Zhewei Li,<sup>a</sup> Yanhui Tang,<sup>a,b</sup> Min Pu,<sup>a\*</sup> Ming Lei<sup>a\*</sup>

<sup>a</sup> *State Key Laboratory of Chemical Resource Engineering, Institute of Computational Chemistry, College of Chemistry, Beijing University of Chemical Technology, Beijing, 100029, China*

<sup>b</sup> *School of Materials Design and Engineering, Beijing Institute of Fashion Technology, Beijing, 100029, China*

\*Email: [leim@mail.buct.edu.cn](mailto:leim@mail.buct.edu.cn) (Ming Lei); [pumin@mail.buct.edu.cn](mailto:pumin@mail.buct.edu.cn) (Min Pu)

## Content

|                                                                                                                                |    |
|--------------------------------------------------------------------------------------------------------------------------------|----|
| 1. The Gibbs free energy profiles of isomerization of epoxides to aldehydes catalyzed by Ru-PNN complex A1 .....               | S1 |
| 2. The Gibbs free energy profiles of the epoxide ring-opening through the branched (Path C) and linear (Path B) pathways ..... | S2 |
| 3. The Gibbs free energy profiles of the epoxide ring-opening through the branched (Path E) and linear (Path F) pathways.....  | S3 |
| 4. The Gibbs free energy profiles of aldimine condensation catalyzed by Ru-PNN complex ....                                    | S4 |
| 5. Energies of all the structures.....                                                                                         | S5 |
| 6. Frequencies of transition states.....                                                                                       | S8 |
| 7. Cartesian coordinates of all the structures .....                                                                           | S9 |

1. The Gibbs free energy profiles of isomerization of epoxides to aldehydes catalyzed by Ru-PNN complex A1

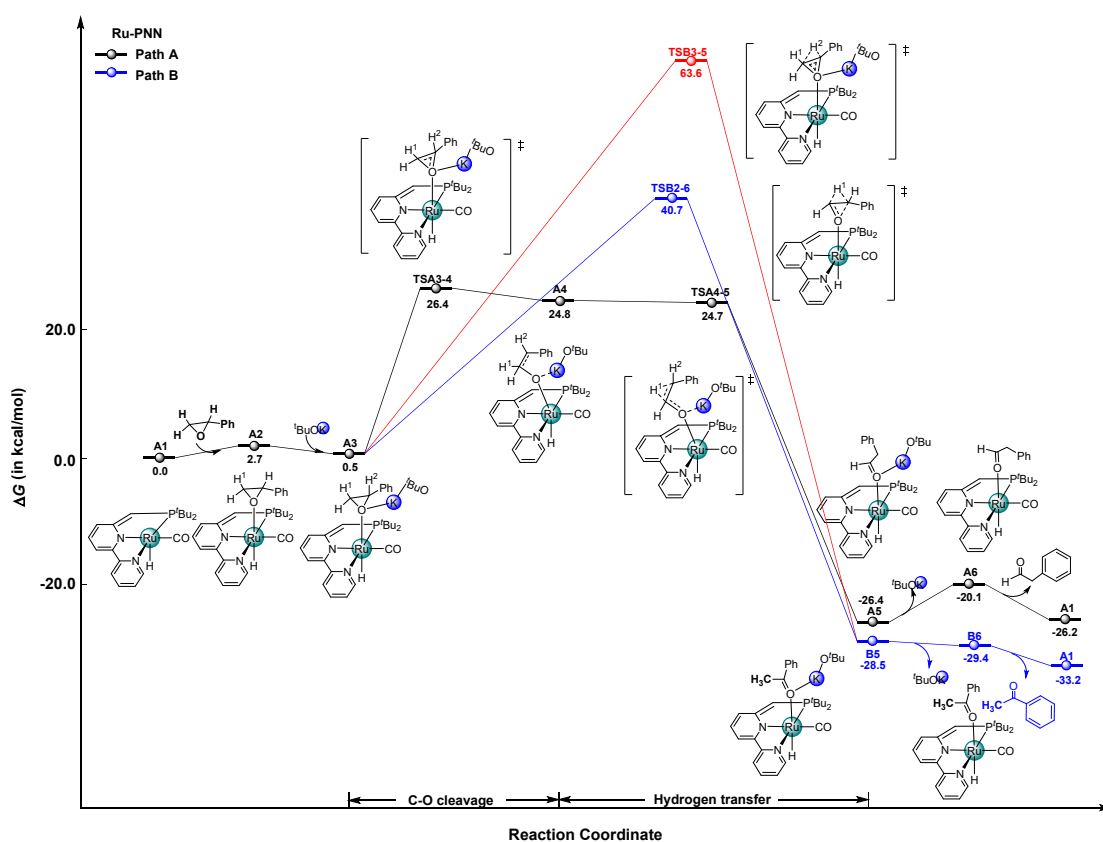

**Figure S1.** The Gibbs free energy profiles of isomerization of epoxides to aldehydes catalyzed by Ru-PNN complex A1 (in kcal/mol at 298.15 K and 1.0 atm pressure).

2. The Gibbs free energy profiles of the epoxide ring-opening through the branched (Path C) and linear (Path B) pathways

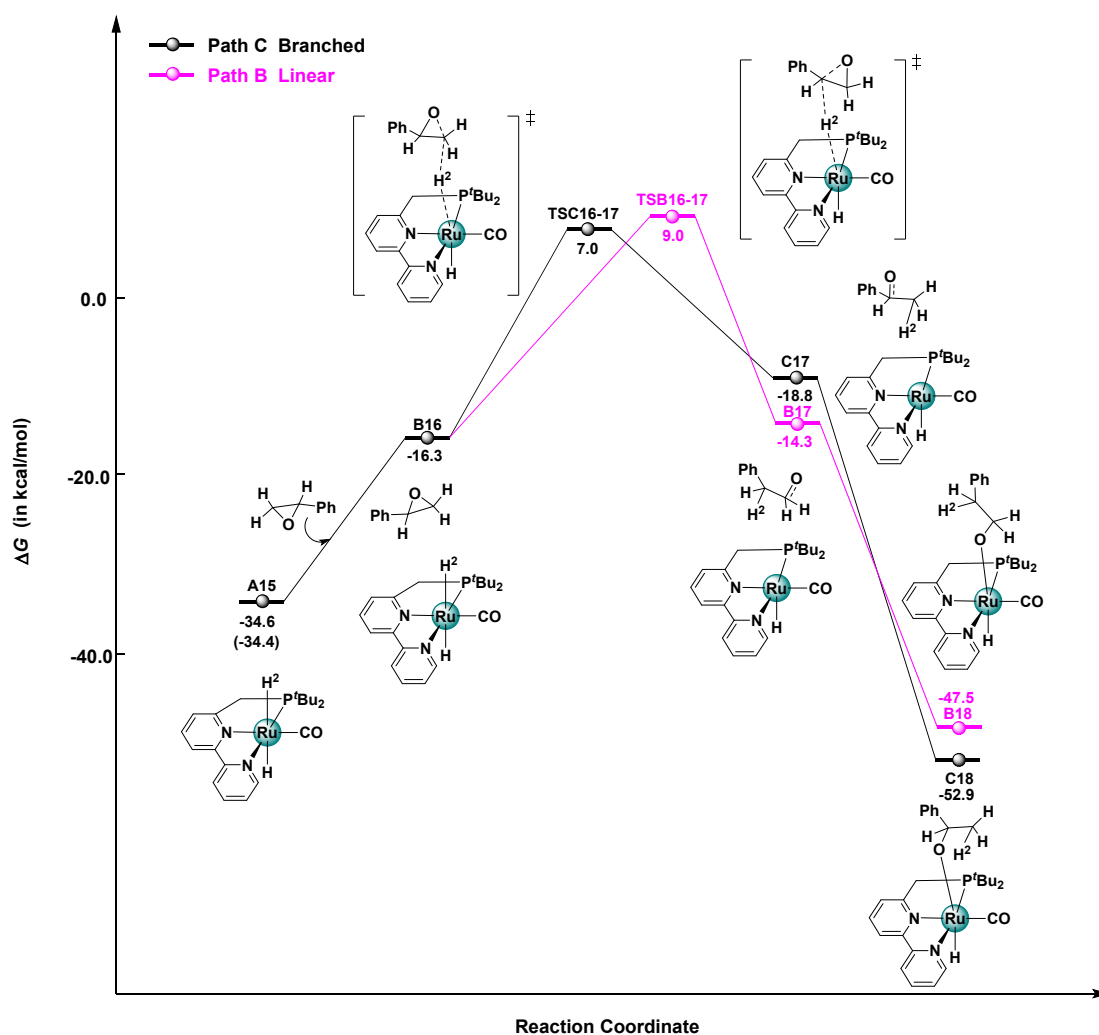

**Figure S2.** The Gibbs free energy profiles of the epoxide ring-opening through the branched (Path C) and linear (Path B) pathways catalyzed by Ru-PNN complex **A15** (in kcal/mol at 298.15 K and 1.0 atm pressure).

### 3. The Gibbs free energy profiles of the epoxide ring-opening through the branched (Path E) and linear (Path F) pathways

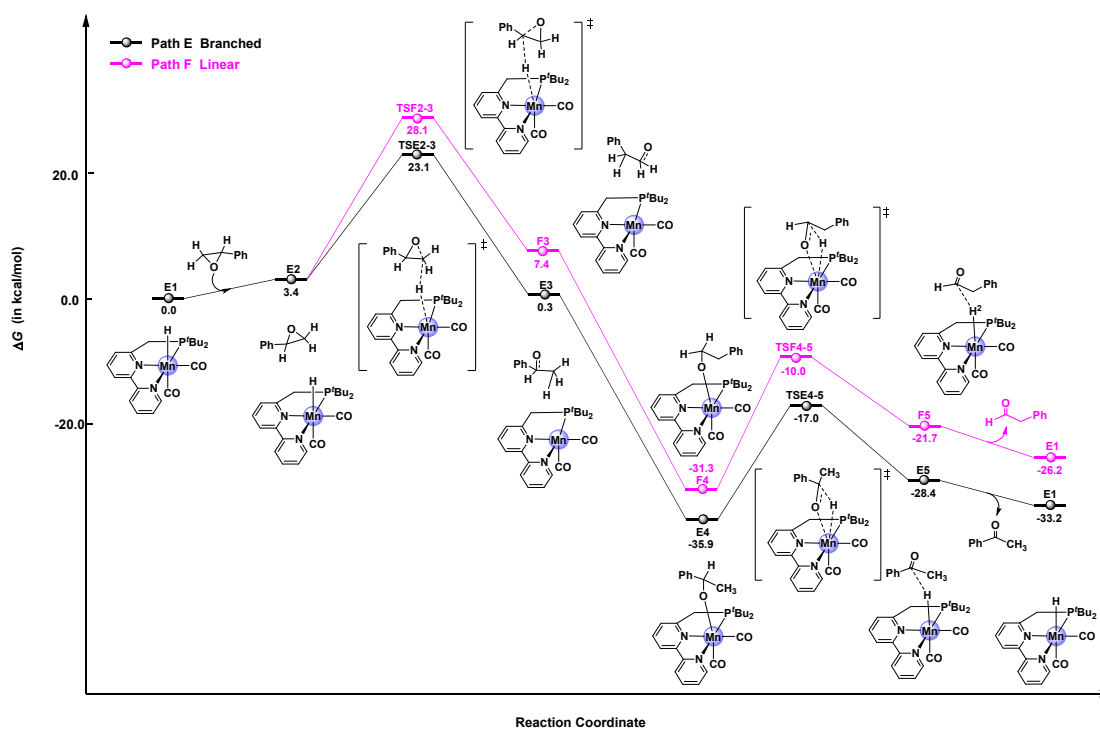

**Figure S3.** The Gibbs free energy profiles of the epoxide ring-opening through the branched (Path E) and linear (Path F) pathways catalyzed by Mn-PNN complex **E1** (in kcal/mol at 298.15 K and 1.0 atm pressure).

#### 4. The Gibbs free energy profiles of aldimine condensation catalyzed by Ru-PNN

complex

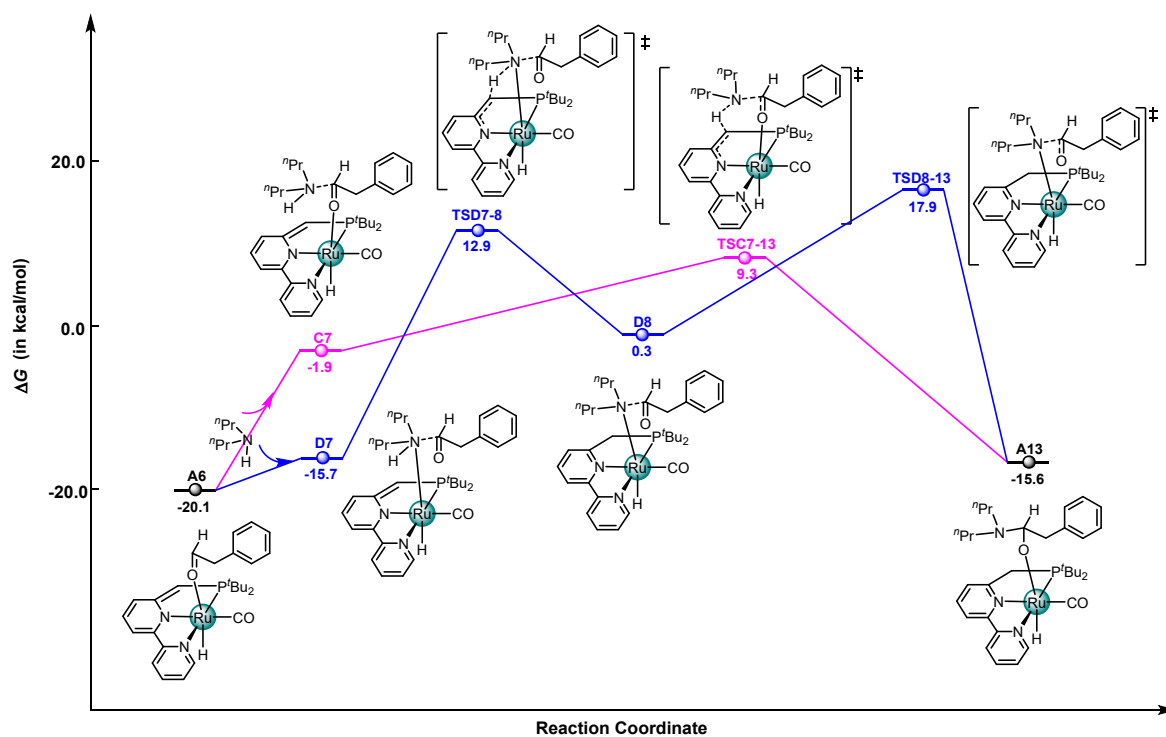

**Figure S4.** The Gibbs free energy profiles of aldimine condensation catalyzed by Ru-PNN complex (in kcal/mol at 298.15 K and 1.0 atm pressure).

## 5. Energies of all the structures

**Table S1.** The calculated absolute electronic energies ( $E$ , in a.u.), thermal free energies ( $G$ , in a.u.), and relative Gibbs energies ( $\Delta G$ , in kcal/mol) (Calculated at 298.15 K and 1.0 atm).

| Complex                                                                            | $E$          | $G$          | $\Delta G$ |
|------------------------------------------------------------------------------------|--------------|--------------|------------|
| <b>A1</b>                                                                          | -1399.607935 | -1399.226145 | 0.0        |
| <b><sup>t</sup>BuOK</b>                                                            | -833.057608  | -832.968038  | /          |
| <b>C<sub>8</sub>H<sub>8</sub>O</b>                                                 | -384.871459  | -384.762524  | /          |
| <b>(CH<sub>3</sub>CH<sub>2</sub>CH<sub>2</sub>)<sub>2</sub>NH</b>                  | -292.457353  | -292.28358   | /          |
| <b>PhCH<sub>2</sub>CON(CH<sub>2</sub>CH<sub>2</sub>CH<sub>3</sub>)<sub>2</sub></b> | -676.200014  | -675.913835  | /          |
| <b>PhCOCH<sub>3</sub></b>                                                          | -384.919532  | -384.812468  | /          |
| <b>H<sub>2</sub></b>                                                               | -1.176146    | -1.177473    | /          |
| <b>A2</b>                                                                          | -1784.496067 | -1783.981389 | 2.7        |
| <b>A3</b>                                                                          | -2617.581542 | -2616.952873 | 0.5        |
| <b>A4</b>                                                                          | -2617.542536 | -2616.914109 | 24.8       |
| <b>A5</b>                                                                          | -2617.622362 | -2616.995787 | -26.4      |
| <b>A6</b>                                                                          | -1784.530272 | -1784.017713 | -20.1      |
| <b>A7</b>                                                                          | -384.906207  | -384.801336  | -26.2      |
| <b>A8</b>                                                                          | -1510.464381 | -1510.04859  | -23.5      |
| <b>A9</b>                                                                          | -1510.482959 | -1510.061844 | -31.8      |
| <b>A10</b>                                                                         | -1510.476652 | -1510.056047 | -28.2      |
| <b>A11</b>                                                                         | -677.377075  | -677.068878  | -16.2      |
| <b>A12</b>                                                                         | -2077.012826 | -2076.295688 | -16.6      |
| <b>A13</b>                                                                         | -2077.013877 | -2076.294021 | -15.6      |
| <b>A14</b>                                                                         | -2077.031916 | -2076.319325 | -31.4      |
| <b>A15</b>                                                                         | -1400.812725 | -1400.410477 | -34.6      |
| <b>A16</b>                                                                         | -1693.285311 | -1692.685145 | -29.0      |
| <b>A17</b>                                                                         | -1693.258944 | -1692.654729 | -9.9       |

|                 |              |              |       |
|-----------------|--------------|--------------|-------|
| <b>A18</b>      | -1693.267731 | -1692.670188 | -19.6 |
| <b>B8</b>       | -969.844622  | -969.343923  | -10.8 |
| <b>B9</b>       | -969.850825  | -969.344596  | -11.2 |
| <b>B16</b>      | -1785.698624 | -1785.166681 | -16.3 |
| <b>B17</b>      | -1785.699311 | -1785.163483 | -14.3 |
| <b>B18</b>      | -1785.756748 | -1785.216469 | -47.5 |
| <b>C7</b>       | -2076.990162 | -2076.272286 | -1.9  |
| <b>C17</b>      | -1785.708288 | -1785.17061  | -18.8 |
| <b>C18</b>      | -1785.762783 | -1785.22499  | -52.9 |
| <b>D7</b>       | -2077.013877 | -2076.294021 | -15.7 |
| <b>D8</b>       | -2076.979113 | -2076.268718 | 0.3   |
| <b>TSA3-4</b>   | -2617.539609 | -2616.911603 | 26.4  |
| <b>TSA4-5</b>   | -2617.540032 | -2616.914386 | 24.7  |
| <b>TSA8-9</b>   | -1510.459717 | -1510.039448 | -17.8 |
| <b>TSA9-10</b>  | -1510.475671 | -1510.055402 | -27.8 |
| <b>TSA12-13</b> | -2076.988555 | -2076.276319 | -4.4  |
| <b>TSA12-14</b> | -2076.967474 | -2076.25333  | 10.0  |
| <b>TSA13-14</b> | -2076.973874 | -2076.258187 | 6.9   |
| <b>TSA15-1</b>  | -1400.75813  | -1400.36144  | -3.8  |
| <b>TSA16-17</b> | -1693.24998  | -1692.649544 | -6.6  |
| <b>TSA17-18</b> | -1693.254754 | -1692.657377 | -11.5 |
| <b>TSB2-6</b>   | -1784.431502 | -1783.920832 | 40.7  |
| <b>TSB3-5</b>   | -2617.477337 | -2616.852384 | 63.3  |
| <b>TSB8-9</b>   | -969.81141   | -969.304998  | 13.6  |
| <b>TSB16-17</b> | -1785.658718 | -1785.126319 | 9.0   |
| <b>TSC7-13</b>  | -2076.971745 | -2076.254475 | 9.3   |
| <b>TSC16-17</b> | -1785.66456  | -1785.129539 | 7.0   |
| <b>TSD7-8</b>   | -2077.004705 | -2076.294297 | 12.9  |
| <b>TSD8-13</b>  | -2076.960626 | -2076.240643 | 17.9  |

|               |              |              |       |
|---------------|--------------|--------------|-------|
| <b>E1</b>     | -2569.5923   | -2569.188313 | 0.0   |
| <b>E2</b>     | -2954.47817  | -2953.942474 | 3.4   |
| <b>E3</b>     | -2954.482573 | -2953.947393 | 0.3   |
| <b>E4</b>     | -2954.543584 | -2954.005065 | -35.9 |
| <b>E5</b>     | -2954.528229 | -2953.993131 | -28.4 |
| <b>F3</b>     | -2954.472452 | -2953.936086 | 7.4   |
| <b>F4</b>     | -2954.538144 | -2953.99765  | -31.3 |
| <b>F5</b>     | -2954.513055 | -2953.982349 | -21.7 |
| <b>TSE2-3</b> | -2954.442798 | -2953.911054 | 23.1  |
| <b>TSE4-5</b> | -2954.510719 | -2953.974849 | -17.0 |
| <b>TSF2-3</b> | -2954.436899 | -2953.903103 | 28.1  |
| <b>TSF4-5</b> | -2954.499753 | -2953.963824 | -10.0 |

---



## 6. Frequencies of transition states

**Table S2.** Calculated imaginary frequencies of transition states at  $\omega$ B97X-D/BS-I level.

---

|                 |                  |
|-----------------|------------------|
| <b>TSA3-4</b>   | 142.32 <i>i</i>  |
| <b>TSA4-5</b>   | 530.20 <i>i</i>  |
| <b>TSA8-9</b>   | 109.40 <i>i</i>  |
| <b>TSA9-10</b>  | 406.04 <i>i</i>  |
| <b>TSA12-13</b> | 1424.16 <i>i</i> |
| <b>TSA12-14</b> | 998.99 <i>i</i>  |
| <b>TSA13-14</b> | 584.77 <i>i</i>  |
| <b>TSA15-1</b>  | 1473.38 <i>i</i> |
| <b>TSA16-17</b> | 814.93 <i>i</i>  |
| <b>TSA17-18</b> | 1069.26 <i>i</i> |
| <b>TSB2-6</b>   | 261.46 <i>i</i>  |
| <b>TSB3-5</b>   | 602.48 <i>i</i>  |
| <b>TSB8-9</b>   | 1164.38 <i>i</i> |
| <b>TSB16-17</b> | 855.52 <i>i</i>  |
| <b>TSC7-13</b>  | 1489.38 <i>i</i> |
| <b>TSC16-17</b> | 875.01 <i>i</i>  |
| <b>TSD7-8</b>   | 1352.24 <i>i</i> |
| <b>TSD8-13</b>  | 111.07 <i>i</i>  |
| <b>TSE2-3</b>   | 851.25 <i>i</i>  |
| <b>TSE4-5</b>   | 515.04 <i>i</i>  |
| <b>TSF2-3</b>   | 844.38 <i>i</i>  |
| <b>TSF4-5</b>   | 413.84 <i>i</i>  |

---

## 7. Cartesian coordinates of all the structures

**Table S3.** Atomic cartesian coordinates of intermediates and transition states

(presented in Å).

**A1**

| -----                   |              |              |              |
|-------------------------|--------------|--------------|--------------|
| Coordinates (Angstroms) |              |              |              |
|                         | X            | Y            | Z            |
| -----                   |              |              |              |
| 44                      | -0.365377000 | -0.755300000 | -0.032090000 |
| 6                       | -3.176845000 | 0.268339000  | -0.013246000 |
| 6                       | -4.571483000 | 0.303335000  | -0.007835000 |
| 6                       | -5.290013000 | -0.882403000 | 0.021320000  |
| 6                       | -4.602684000 | -2.090602000 | 0.044670000  |
| 6                       | -3.217856000 | -2.058045000 | 0.037297000  |
| 7                       | -2.517791000 | -0.914886000 | 0.010657000  |
| 1                       | -6.374890000 | -0.861638000 | 0.024547000  |
| 1                       | -5.093156000 | 1.251725000  | -0.028889000 |
| 1                       | -5.120974000 | -3.041868000 | 0.066244000  |
| 1                       | -2.633486000 | -2.970864000 | 0.049488000  |
| 6                       | -2.330942000 | 1.491169000  | -0.048307000 |
| 6                       | -2.847785000 | 2.766089000  | -0.078209000 |
| 6                       | -1.926788000 | 3.843107000  | -0.126751000 |
| 6                       | -0.584493000 | 3.613223000  | -0.148662000 |
| 6                       | -0.068692000 | 2.266602000  | -0.121899000 |
| 7                       | -0.999812000 | 1.245617000  | -0.053477000 |
| 1                       | -2.302259000 | 4.862213000  | -0.149338000 |
| 1                       | -3.912390000 | 2.956455000  | -0.071047000 |
| 1                       | 0.123413000  | 4.434220000  | -0.190085000 |
| 6                       | 1.279918000  | 1.957073000  | -0.154899000 |
| 1                       | 2.010775000  | 2.757975000  | -0.175560000 |
| 15                      | 1.742852000  | 0.247911000  | -0.031620000 |
| 6                       | 0.196424000  | -2.530259000 | -0.112507000 |
| 8                       | 0.537580000  | -3.636907000 | -0.219077000 |
| 6                       | 2.559018000  | 0.018249000  | 1.669640000  |
| 6                       | 1.554716000  | 0.600913000  | 2.680113000  |
| 6                       | 2.758790000  | -1.466224000 | 2.010062000  |
| 6                       | 3.888576000  | 0.767115000  | 1.812063000  |
| 1                       | 1.404015000  | 1.672514000  | 2.530519000  |
| 1                       | 0.575338000  | 0.110464000  | 2.610045000  |
| 1                       | 1.927548000  | 0.441503000  | 3.698986000  |
| 1                       | 3.441673000  | -1.975164000 | 1.327879000  |
| 1                       | 3.180839000  | -1.552779000 | 3.019194000  |
| 1                       | 1.808719000  | -2.008095000 | 1.999979000  |

|   |              |              |              |
|---|--------------|--------------|--------------|
| 1 | 4.213493000  | 0.744019000  | 2.860021000  |
| 1 | 4.683175000  | 0.307784000  | 1.217258000  |
| 1 | 3.795213000  | 1.818061000  | 1.519670000  |
| 6 | 2.971079000  | -0.076224000 | -1.428528000 |
| 6 | 3.720127000  | -1.399499000 | -1.233217000 |
| 6 | 2.143545000  | -0.164230000 | -2.722359000 |
| 6 | 3.975198000  | 1.076389000  | -1.590773000 |
| 1 | 4.458584000  | -1.342196000 | -0.428222000 |
| 1 | 3.036397000  | -2.228217000 | -1.023050000 |
| 1 | 4.262958000  | -1.646356000 | -2.153750000 |
| 1 | 1.487055000  | 0.704248000  | -2.837837000 |
| 1 | 2.823750000  | -0.195930000 | -3.582298000 |
| 1 | 1.524286000  | -1.064618000 | -2.744252000 |
| 1 | 4.658977000  | 0.841909000  | -2.415622000 |
| 1 | 3.466325000  | 2.011808000  | -1.839447000 |
| 1 | 4.582520000  | 1.243130000  | -0.699106000 |
| 1 | -0.350364000 | -0.800329000 | -1.574553000 |

A2

Coordinates (Angstroms)

|    | X            | Y            | Z            |
|----|--------------|--------------|--------------|
| 44 | 0.190816000  | -0.080888000 | -0.585399000 |
| 6  | -1.847899000 | 2.108403000  | -0.567783000 |
| 6  | -3.038848000 | 2.806253000  | -0.769902000 |
| 6  | -4.106181000 | 2.180770000  | -1.397507000 |
| 6  | -3.965524000 | 0.863740000  | -1.816490000 |
| 6  | -2.761484000 | 0.221966000  | -1.574983000 |
| 7  | -1.730930000 | 0.818390000  | -0.962985000 |
| 1  | -5.034090000 | 2.718799000  | -1.561738000 |
| 1  | -3.127104000 | 3.837064000  | -0.450848000 |
| 1  | -4.769490000 | 0.332819000  | -2.311666000 |
| 1  | -2.605773000 | -0.810221000 | -1.863083000 |
| 6  | -0.642220000 | 2.716646000  | 0.057773000  |
| 6  | -0.603674000 | 4.016776000  | 0.516547000  |
| 6  | 0.623242000  | 4.478338000  | 1.052666000  |
| 6  | 1.719458000  | 3.668192000  | 1.088884000  |
| 6  | 1.652710000  | 2.316500000  | 0.590597000  |
| 7  | 0.422117000  | 1.889313000  | 0.126323000  |
| 1  | 0.690939000  | 5.494475000  | 1.431455000  |
| 1  | -1.461772000 | 4.673631000  | 0.466028000  |
| 1  | 2.662940000  | 4.026802000  | 1.487155000  |
| 6  | 2.733681000  | 1.452437000  | 0.555287000  |
| 1  | 3.690599000  | 1.785487000  | 0.944099000  |

|    |              |              |              |
|----|--------------|--------------|--------------|
| 15 | 2.471254000  | -0.208236000 | -0.013381000 |
| 6  | 0.022824000  | -1.770917000 | -1.337577000 |
| 8  | -0.071332000 | -2.808106000 | -1.859785000 |
| 6  | 2.895046000  | -1.367781000 | 1.444252000  |
| 6  | 2.321050000  | -0.723269000 | 2.717135000  |
| 6  | 2.203020000  | -2.723335000 | 1.229686000  |
| 6  | 4.393801000  | -1.588421000 | 1.690276000  |
| 1  | 2.841592000  | 0.204710000  | 2.967236000  |
| 1  | 1.258668000  | -0.504172000 | 2.608882000  |
| 1  | 2.442872000  | -1.422054000 | 3.555216000  |
| 1  | 2.522878000  | -3.218001000 | 0.308748000  |
| 1  | 2.440244000  | -3.395778000 | 2.064220000  |
| 1  | 1.116813000  | -2.602857000 | 1.187768000  |
| 1  | 4.518785000  | -2.164189000 | 2.616189000  |
| 1  | 4.881959000  | -2.153402000 | 0.892836000  |
| 1  | 4.925159000  | -0.641124000 | 1.824700000  |
| 6  | 3.711768000  | -0.502644000 | -1.422337000 |
| 6  | 3.772706000  | -1.986408000 | -1.808079000 |
| 6  | 3.225424000  | 0.289581000  | -2.648059000 |
| 6  | 5.115393000  | 0.027801000  | -1.085075000 |
| 1  | 4.241876000  | -2.605151000 | -1.038873000 |
| 1  | 2.775529000  | -2.389277000 | -2.012040000 |
| 1  | 4.366532000  | -2.100846000 | -2.723438000 |
| 1  | 3.017381000  | 1.334795000  | -2.398198000 |
| 1  | 4.010043000  | 0.273105000  | -3.414641000 |
| 1  | 2.321049000  | -0.144523000 | -3.078962000 |
| 1  | 5.768019000  | -0.110856000 | -1.955725000 |
| 1  | 5.083335000  | 1.099381000  | -0.866051000 |
| 1  | 5.587289000  | -0.480751000 | -0.244747000 |
| 6  | -1.441739000 | 0.261526000  | 2.480366000  |
| 6  | -1.804843000 | -1.141427000 | 2.255779000  |
| 8  | -0.649660000 | -0.565921000 | 1.631352000  |
| 1  | -0.952732000 | 0.558965000  | 3.404892000  |
| 1  | -1.529048000 | -1.863116000 | 3.024367000  |
| 1  | 0.649316000  | 0.410070000  | -1.988581000 |
| 6  | -2.940680000 | -1.538577000 | 1.373367000  |
| 6  | -4.165448000 | -0.875502000 | 1.440472000  |
| 6  | -2.783594000 | -2.606791000 | 0.486690000  |
| 6  | -5.223853000 | -1.272922000 | 0.627318000  |
| 1  | -4.291858000 | -0.048068000 | 2.132834000  |
| 6  | -3.836209000 | -2.995634000 | -0.334943000 |
| 1  | -1.829728000 | -3.122468000 | 0.429929000  |
| 6  | -5.059336000 | -2.329687000 | -0.263940000 |
| 1  | -6.175156000 | -0.753442000 | 0.687380000  |

|   |              |              |              |
|---|--------------|--------------|--------------|
| 1 | -3.701796000 | -3.817183000 | -1.031547000 |
| 1 | -5.882541000 | -2.636983000 | -0.901752000 |
| 1 | -1.999407000 | 1.041553000  | 1.967815000  |

---

**A3**

---

Coordinates (Angstroms)

|    | X            | Y            | Z            |
|----|--------------|--------------|--------------|
| 44 | 1.127489000  | 0.052226000  | 0.812902000  |
| 6  | -0.500137000 | 2.546333000  | 0.929343000  |
| 6  | -1.377790000 | 3.527392000  | 1.385994000  |
| 6  | -2.180240000 | 3.274566000  | 2.488155000  |
| 6  | -2.090798000 | 2.041998000  | 3.121996000  |
| 6  | -1.192653000 | 1.113174000  | 2.623368000  |
| 7  | -0.418054000 | 1.350734000  | 1.557706000  |
| 1  | -2.870750000 | 4.031655000  | 2.843996000  |
| 1  | -1.433772000 | 4.483457000  | 0.882574000  |
| 1  | -2.697095000 | 1.798330000  | 3.986391000  |
| 1  | -1.071885000 | 0.143788000  | 3.093508000  |
| 6  | 0.397764000  | 2.738456000  | -0.240183000 |
| 6  | 0.341586000  | 3.838233000  | -1.068159000 |
| 6  | 1.239228000  | 3.874868000  | -2.162157000 |
| 6  | 2.134446000  | 2.866154000  | -2.370590000 |
| 6  | 2.184921000  | 1.735791000  | -1.478966000 |
| 7  | 1.270289000  | 1.727334000  | -0.443260000 |
| 1  | 1.214404000  | 4.721256000  | -2.842849000 |
| 1  | -0.377121000 | 4.632343000  | -0.917828000 |
| 1  | 2.829003000  | 2.899367000  | -3.203301000 |
| 6  | 3.078890000  | 0.682144000  | -1.608572000 |
| 15 | 3.101106000  | -0.540578000 | -0.324556000 |
| 6  | 1.063769000  | -1.406582000 | 1.944029000  |
| 8  | 1.018767000  | -2.322772000 | 2.671950000  |
| 6  | 4.670282000  | -0.247964000 | 0.715433000  |
| 6  | 4.765611000  | 1.268552000  | 0.956342000  |
| 6  | 4.572147000  | -0.952000000 | 2.077669000  |
| 6  | 5.957294000  | -0.686357000 | 0.004258000  |
| 1  | 4.956744000  | 1.810054000  | 0.026223000  |
| 1  | 3.851629000  | 1.673512000  | 1.400058000  |
| 1  | 5.593307000  | 1.468814000  | 1.647633000  |
| 1  | 4.445578000  | -2.033635000 | 1.990411000  |
| 1  | 5.496533000  | -0.775244000 | 2.641583000  |
| 1  | 3.739361000  | -0.560680000 | 2.667115000  |
| 1  | 6.822434000  | -0.322641000 | 0.572057000  |
| 1  | 6.050706000  | -1.773664000 | -0.059799000 |

|    |              |              |              |
|----|--------------|--------------|--------------|
| 1  | 6.030983000  | -0.267472000 | -1.004638000 |
| 6  | 3.199263000  | -2.233349000 | -1.169422000 |
| 6  | 3.448193000  | -3.348909000 | -0.147219000 |
| 6  | 1.826816000  | -2.455663000 | -1.818116000 |
| 6  | 4.243926000  | -2.307017000 | -2.294337000 |
| 1  | 4.455813000  | -3.308804000 | 0.273857000  |
| 1  | 2.729645000  | -3.313618000 | 0.678178000  |
| 1  | 3.341234000  | -4.323454000 | -0.639342000 |
| 1  | 1.639948000  | -1.699404000 | -2.584530000 |
| 1  | 1.798589000  | -3.441248000 | -2.298306000 |
| 1  | 1.018233000  | -2.401542000 | -1.084977000 |
| 1  | 4.129553000  | -3.262021000 | -2.822147000 |
| 1  | 4.099321000  | -1.508584000 | -3.028416000 |
| 1  | 5.270423000  | -2.259182000 | -1.931326000 |
| 1  | 3.839564000  | 0.726415000  | -2.381091000 |
| 1  | 2.067677000  | 0.684470000  | 1.872460000  |
| 6  | -0.686705000 | -0.327807000 | -2.270248000 |
| 1  | -0.185506000 | 0.602235000  | -2.529630000 |
| 6  | -1.931662000 | -0.309522000 | -1.508625000 |
| 1  | -2.570574000 | -1.197906000 | -1.505695000 |
| 1  | -0.484695000 | -1.166023000 | -2.932207000 |
| 8  | -0.642369000 | -0.633336000 | -0.873867000 |
| 6  | -2.665985000 | 0.923994000  | -1.118158000 |
| 6  | -3.623835000 | 0.806147000  | -0.103927000 |
| 6  | -2.519741000 | 2.135817000  | -1.793993000 |
| 6  | -4.413479000 | 1.898736000  | 0.236543000  |
| 1  | -3.763133000 | -0.177722000 | 0.347976000  |
| 6  | -3.317626000 | 3.225854000  | -1.454609000 |
| 1  | -1.792318000 | 2.230537000  | -2.593893000 |
| 6  | -4.263404000 | 3.108842000  | -0.439665000 |
| 1  | -5.160692000 | 1.802460000  | 1.018807000  |
| 1  | -3.203839000 | 4.164316000  | -1.989090000 |
| 1  | -4.890132000 | 3.957608000  | -0.181092000 |
| 19 | -1.442524000 | -2.678127000 | 0.761239000  |
| 8  | -3.645533000 | -2.398737000 | -0.062092000 |
| 6  | -4.930930000 | -2.731336000 | -0.399294000 |
| 6  | -5.358348000 | -2.027189000 | -1.708924000 |
| 1  | -6.388444000 | -2.262316000 | -2.007671000 |
| 1  | -5.277038000 | -0.940594000 | -1.592057000 |
| 1  | -4.690846000 | -2.328138000 | -2.525822000 |
| 6  | -5.058527000 | -4.258253000 | -0.609950000 |
| 1  | -4.798310000 | -4.784159000 | 0.317440000  |
| 1  | -6.066903000 | -4.575453000 | -0.908105000 |
| 1  | -4.354855000 | -4.578348000 | -1.387818000 |

|   |              |              |             |
|---|--------------|--------------|-------------|
| 6 | -5.915071000 | -2.312214000 | 0.717405000 |
| 1 | -6.957242000 | -2.581558000 | 0.500151000 |
| 1 | -5.627290000 | -2.790593000 | 1.661423000 |
| 1 | -5.872211000 | -1.226525000 | 0.865321000 |

---

#### A4

---

| Coordinates (Angstroms) |              |              |              |
|-------------------------|--------------|--------------|--------------|
|                         | X            | Y            | Z            |
| 44                      | 1.067848000  | -1.190517000 | 0.210054000  |
| 6                       | -1.455548000 | -0.875475000 | 1.820610000  |
| 6                       | -2.640364000 | -1.167777000 | 2.494508000  |
| 6                       | -3.123277000 | -2.463712000 | 2.510717000  |
| 6                       | -2.402492000 | -3.456922000 | 1.855890000  |
| 6                       | -1.242323000 | -3.095860000 | 1.192475000  |
| 7                       | -0.784004000 | -1.835002000 | 1.146629000  |
| 1                       | -4.047366000 | -2.697071000 | 3.028574000  |
| 1                       | -3.188436000 | -0.378593000 | 2.992742000  |
| 1                       | -2.725597000 | -4.491636000 | 1.857150000  |
| 1                       | -0.633226000 | -3.837504000 | 0.684236000  |
| 6                       | -0.844553000 | 0.477772000  | 1.827501000  |
| 6                       | -1.294826000 | 1.521266000  | 2.596001000  |
| 6                       | -0.601853000 | 2.760796000  | 2.512254000  |
| 6                       | 0.484772000  | 2.895626000  | 1.706943000  |
| 6                       | 0.966640000  | 1.771746000  | 0.946393000  |
| 7                       | 0.219570000  | 0.609650000  | 0.986270000  |
| 1                       | -0.947657000 | 3.602268000  | 3.104623000  |
| 1                       | -2.133067000 | 1.412065000  | 3.271391000  |
| 1                       | 1.025751000  | 3.833747000  | 1.647049000  |
| 6                       | 2.125102000  | 1.793200000  | 0.181198000  |
| 15                      | 2.909457000  | 0.208896000  | -0.143182000 |
| 6                       | 1.841675000  | -2.754156000 | -0.402190000 |
| 8                       | 2.331123000  | -3.742530000 | -0.779544000 |
| 6                       | 4.227263000  | 0.045062000  | 1.238183000  |
| 6                       | 3.572496000  | 0.482754000  | 2.560563000  |
| 6                       | 4.669755000  | -1.419662000 | 1.384664000  |
| 6                       | 5.458475000  | 0.938151000  | 1.032626000  |
| 1                       | 3.383825000  | 1.559521000  | 2.582607000  |
| 1                       | 2.628410000  | -0.035655000 | 2.744210000  |
| 1                       | 4.255060000  | 0.243992000  | 3.385361000  |
| 1                       | 5.110923000  | -1.827265000 | 0.472433000  |
| 1                       | 5.428245000  | -1.487881000 | 2.174653000  |
| 1                       | 3.826968000  | -2.055913000 | 1.664836000  |
| 1                       | 6.064633000  | 0.922241000  | 1.946981000  |

|    |              |              |              |
|----|--------------|--------------|--------------|
| 1  | 6.102109000  | 0.594779000  | 0.219414000  |
| 1  | 5.183272000  | 1.980936000  | 0.844813000  |
| 6  | 3.788343000  | 0.336389000  | -1.821569000 |
| 6  | 4.735939000  | -0.858963000 | -2.001063000 |
| 6  | 2.721746000  | 0.262245000  | -2.927581000 |
| 6  | 4.553966000  | 1.653823000  | -2.025247000 |
| 1  | 5.588939000  | -0.828197000 | -1.319749000 |
| 1  | 4.214964000  | -1.811706000 | -1.861802000 |
| 1  | 5.138432000  | -0.848133000 | -3.021010000 |
| 1  | 2.184686000  | 1.211345000  | -3.012624000 |
| 1  | 3.223175000  | 0.091579000  | -3.888422000 |
| 1  | 1.981826000  | -0.524152000 | -2.755777000 |
| 1  | 4.877440000  | 1.712597000  | -3.072094000 |
| 1  | 3.912989000  | 2.520769000  | -1.836345000 |
| 1  | 5.446858000  | 1.742615000  | -1.406567000 |
| 1  | 2.696989000  | 2.717004000  | 0.152154000  |
| 1  | 1.685631000  | -1.510737000 | 1.641604000  |
| 6  | -0.251764000 | 0.639207000  | -1.844823000 |
| 1  | 0.633300000  | 1.283298000  | -1.594341000 |
| 6  | -1.342692000 | 1.120858000  | -1.000002000 |
| 1  | -2.083009000 | 0.378285000  | -0.637448000 |
| 1  | -0.507824000 | 0.977487000  | -2.878474000 |
| 8  | 0.020881000  | -0.688871000 | -1.761827000 |
| 6  | -1.658321000 | 2.495415000  | -0.776278000 |
| 6  | -2.797314000 | 2.779772000  | 0.002521000  |
| 6  | -0.863354000 | 3.563214000  | -1.250334000 |
| 6  | -3.135192000 | 4.092416000  | 0.304145000  |
| 1  | -3.397792000 | 1.947036000  | 0.354047000  |
| 6  | -1.203861000 | 4.867124000  | -0.943334000 |
| 1  | 0.028787000  | 3.357455000  | -1.832317000 |
| 6  | -2.335363000 | 5.131657000  | -0.162637000 |
| 1  | -4.014977000 | 4.305960000  | 0.902324000  |
| 1  | -0.589701000 | 5.687755000  | -1.299794000 |
| 1  | -2.592228000 | 6.159594000  | 0.075366000  |
| 19 | -1.837854000 | -2.383101000 | -1.819430000 |
| 8  | -3.421552000 | -0.874386000 | -0.676684000 |
| 6  | -4.755582000 | -0.705232000 | -0.915667000 |
| 6  | -4.995721000 | 0.396889000  | -1.975725000 |
| 1  | -6.056675000 | 0.546587000  | -2.216475000 |
| 1  | -4.590728000 | 1.352718000  | -1.625202000 |
| 1  | -4.467481000 | 0.136387000  | -2.901680000 |
| 6  | -5.382729000 | -2.021145000 | -1.444813000 |
| 1  | -5.186764000 | -2.828624000 | -0.728292000 |
| 1  | -6.467153000 | -1.959352000 | -1.605227000 |



|   |              |              |              |
|---|--------------|--------------|--------------|
| 1 | -4.926092000 | -2.295500000 | -2.406466000 |
| 6 | -5.515901000 | -0.315776000 | 0.375474000  |
| 1 | -6.589340000 | -0.153322000 | 0.210660000  |
| 1 | -5.401107000 | -1.104931000 | 1.127225000  |
| 1 | -5.096384000 | 0.605961000  | 0.795933000  |

A5

Coordinates (Angstroms)

|    | X            | Y            | Z            |
|----|--------------|--------------|--------------|
| 44 | 1.319787000  | -0.549025000 | 0.747190000  |
| 6  | -0.935863000 | 1.019808000  | 1.936499000  |
| 6  | -2.073054000 | 1.357800000  | 2.672087000  |
| 6  | -2.736650000 | 0.386613000  | 3.402778000  |
| 6  | -2.232249000 | -0.909902000 | 3.417348000  |
| 6  | -1.089208000 | -1.174720000 | 2.683545000  |
| 7  | -0.466490000 | -0.248450000 | 1.937908000  |
| 1  | -3.630678000 | 0.639049000  | 3.962738000  |
| 1  | -2.436386000 | 2.376973000  | 2.666448000  |
| 1  | -2.705931000 | -1.700235000 | 3.987432000  |
| 1  | -0.632703000 | -2.159415000 | 2.694740000  |
| 6  | -0.171394000 | 2.006577000  | 1.131461000  |
| 6  | -0.602976000 | 3.294620000  | 0.911401000  |
| 6  | 0.220533000  | 4.129334000  | 0.118198000  |
| 6  | 1.388414000  | 3.662940000  | -0.409448000 |
| 6  | 1.797545000  | 2.297622000  | -0.193804000 |
| 7  | 0.981904000  | 1.526958000  | 0.610092000  |
| 1  | -0.089795000 | 5.152147000  | -0.075038000 |
| 1  | -1.550454000 | 3.655624000  | 1.286348000  |
| 1  | 2.017604000  | 4.299490000  | -1.022684000 |
| 6  | 2.922257000  | 1.727291000  | -0.771203000 |
| 15 | 3.286427000  | 0.032364000  | -0.397837000 |
| 6  | 1.618428000  | -2.374414000 | 0.845142000  |
| 8  | 1.777539000  | -3.529156000 | 0.921056000  |
| 6  | 4.844102000  | 0.008346000  | 0.694155000  |
| 6  | 4.637912000  | 1.081697000  | 1.777272000  |
| 6  | 5.010131000  | -1.354273000 | 1.383187000  |
| 6  | 6.124384000  | 0.364409000  | -0.073821000 |
| 1  | 4.608421000  | 2.085582000  | 1.345331000  |
| 1  | 3.708843000  | 0.928025000  | 2.332866000  |
| 1  | 5.470601000  | 1.036827000  | 2.489892000  |
| 1  | 5.127571000  | -2.177191000 | 0.674499000  |
| 1  | 5.907587000  | -1.334965000 | 2.014269000  |
| 1  | 4.153296000  | -1.578906000 | 2.023799000  |

|    |              |              |              |
|----|--------------|--------------|--------------|
| 1  | 6.947313000  | 0.489579000  | 0.640565000  |
| 1  | 6.425080000  | -0.416275000 | -0.776884000 |
| 1  | 6.020841000  | 1.308176000  | -0.619332000 |
| 6  | 3.642849000  | -0.816688000 | -2.057152000 |
| 6  | 4.278916000  | -2.198638000 | -1.861994000 |
| 6  | 2.282302000  | -1.005408000 | -2.743812000 |
| 6  | 4.514678000  | 0.040716000  | -2.987702000 |
| 1  | 5.304823000  | -2.137829000 | -1.490040000 |
| 1  | 3.697981000  | -2.820677000 | -1.173363000 |
| 1  | 4.315543000  | -2.720128000 | -2.826372000 |
| 1  | 1.765625000  | -0.048109000 | -2.860358000 |
| 1  | 2.434146000  | -1.432787000 | -3.742642000 |
| 1  | 1.635819000  | -1.679845000 | -2.176857000 |
| 1  | 4.624130000  | -0.472955000 | -3.950832000 |
| 1  | 4.048728000  | 1.010682000  | -3.183134000 |
| 1  | 5.517524000  | 0.213954000  | -2.596069000 |
| 1  | 3.597798000  | 2.352352000  | -1.345431000 |
| 1  | 2.156884000  | -0.428750000 | 2.056489000  |
| 6  | -0.741907000 | 0.405149000  | -1.667003000 |
| 1  | -0.107596000 | 1.301784000  | -1.768233000 |
| 6  | -2.105987000 | 0.462783000  | -2.275559000 |
| 1  | -2.640644000 | -0.479868000 | -2.085871000 |
| 1  | -1.997149000 | 0.662249000  | -3.348538000 |
| 8  | -0.326615000 | -0.551851000 | -1.027269000 |
| 6  | -2.834794000 | 1.606766000  | -1.591329000 |
| 6  | -3.592810000 | 1.318349000  | -0.453251000 |
| 6  | -2.721415000 | 2.925753000  | -2.034429000 |
| 6  | -4.252709000 | 2.346188000  | 0.215881000  |
| 1  | -3.672924000 | 0.270069000  | -0.152156000 |
| 6  | -3.374411000 | 3.950814000  | -1.355774000 |
| 1  | -2.127051000 | 3.152665000  | -2.916244000 |
| 6  | -4.143004000 | 3.662202000  | -0.229260000 |
| 1  | -4.858218000 | 2.115598000  | 1.088295000  |
| 1  | -3.286891000 | 4.973937000  | -1.709084000 |
| 1  | -4.660694000 | 4.461716000  | 0.292998000  |
| 19 | -1.475872000 | -2.793425000 | -0.221284000 |
| 8  | -3.622934000 | -1.836314000 | -0.665349000 |
| 6  | -4.948412000 | -2.158558000 | -0.780002000 |
| 6  | -5.591392000 | -1.428609000 | -1.981825000 |
| 1  | -6.656276000 | -1.662750000 | -2.112739000 |
| 1  | -5.493461000 | -0.345083000 | -1.851775000 |
| 1  | -5.065531000 | -1.702891000 | -2.904262000 |
| 6  | -5.122428000 | -3.683514000 | -0.989389000 |
| 1  | -4.696929000 | -4.223896000 | -0.132878000 |

|   |              |              |              |
|---|--------------|--------------|--------------|
| 1 | -6.169539000 | -3.996446000 | -1.097559000 |
| 1 | -4.580447000 | -3.995097000 | -1.891183000 |
| 6 | -5.723372000 | -1.762465000 | 0.499831000  |
| 1 | -6.787382000 | -2.032315000 | 0.463552000  |
| 1 | -5.272416000 | -2.255960000 | 1.369744000  |
| 1 | -5.654873000 | -0.679949000 | 0.659474000  |

**A6**

Coordinates (Angstroms)

|    | X            | Y            | Z            |
|----|--------------|--------------|--------------|
| 44 | -0.760316000 | 1.118806000  | 0.361604000  |
| 6  | 1.649726000  | 2.465907000  | -0.805823000 |
| 6  | 2.700836000  | 3.364996000  | -0.990868000 |
| 6  | 2.871938000  | 4.416302000  | -0.102481000 |
| 6  | 1.986486000  | 4.554442000  | 0.960170000  |
| 6  | 0.963246000  | 3.628808000  | 1.087922000  |
| 7  | 0.795285000  | 2.609871000  | 0.234818000  |
| 1  | 3.684535000  | 5.121779000  | -0.240923000 |
| 1  | 3.381659000  | 3.243873000  | -1.823888000 |
| 1  | 2.077862000  | 5.360872000  | 1.678287000  |
| 1  | 0.240332000  | 3.693630000  | 1.892859000  |
| 6  | 1.395897000  | 1.308821000  | -1.707307000 |
| 6  | 2.167468000  | 1.030611000  | -2.815854000 |
| 6  | 1.797189000  | -0.088990000 | -3.600457000 |
| 6  | 0.697879000  | -0.830886000 | -3.283681000 |
| 6  | -0.108701000 | -0.498124000 | -2.134051000 |
| 7  | 0.344881000  | 0.542793000  | -1.341452000 |
| 1  | 2.392342000  | -0.349218000 | -4.471342000 |
| 1  | 3.015987000  | 1.640009000  | -3.096358000 |
| 1  | 0.400809000  | -1.676350000 | -3.895626000 |
| 6  | -1.271439000 | -1.162733000 | -1.790543000 |
| 15 | -2.087674000 | -0.703944000 | -0.282141000 |
| 6  | -1.853147000 | 1.722121000  | 1.741807000  |
| 8  | -2.563464000 | 2.124517000  | 2.570386000  |
| 6  | -1.963875000 | -2.209576000 | 0.876523000  |
| 6  | -0.521912000 | -2.727669000 | 0.740620000  |
| 6  | -2.197873000 | -1.767809000 | 2.329691000  |
| 6  | -2.900394000 | -3.374034000 | 0.529704000  |
| 1  | -0.358195000 | -3.205323000 | -0.228570000 |
| 1  | 0.211501000  | -1.927306000 | 0.839949000  |
| 1  | -0.322455000 | -3.467162000 | 1.526403000  |
| 1  | -3.185400000 | -1.324261000 | 2.480690000  |
| 1  | -2.123873000 | -2.638497000 | 2.994096000  |
| 1  | -1.447232000 | -1.038088000 | 2.643585000  |

|   |              |              |              |
|---|--------------|--------------|--------------|
| 1 | -2.642807000 | -4.237264000 | 1.156823000  |
| 1 | -3.952652000 | -3.145178000 | 0.716523000  |
| 1 | -2.790183000 | -3.686701000 | -0.513615000 |
| 6 | -3.904408000 | -0.378205000 | -0.719769000 |
| 6 | -4.778985000 | -0.299021000 | 0.538301000  |
| 6 | -3.972463000 | 0.978111000  | -1.441977000 |
| 6 | -4.462986000 | -1.434434000 | -1.687716000 |
| 1 | -4.894503000 | -1.267197000 | 1.032459000  |
| 1 | -4.380495000 | 0.414815000  | 1.266109000  |
| 1 | -5.783220000 | 0.043842000  | 0.260010000  |
| 1 | -3.253455000 | 1.031203000  | -2.265436000 |
| 1 | -4.978721000 | 1.111989000  | -1.858230000 |
| 1 | -3.770888000 | 1.809008000  | -0.762306000 |
| 1 | -5.500928000 | -1.179442000 | -1.935195000 |
| 1 | -3.895676000 | -1.450463000 | -2.622947000 |
| 1 | -4.468826000 | -2.442363000 | -1.271786000 |
| 6 | 1.848782000  | -0.248497000 | 2.244662000  |
| 8 | 0.692621000  | 0.052552000  | 2.024427000  |
| 1 | -1.621025000 | 1.964284000  | -0.619301000 |
| 1 | -1.596148000 | -2.007875000 | -2.388888000 |
| 1 | 2.107129000  | -0.694523000 | 3.223489000  |
| 6 | 2.984140000  | -0.129536000 | 1.267374000  |
| 1 | 2.680978000  | 0.485155000  | 0.421216000  |
| 1 | 3.829965000  | 0.344551000  | 1.777711000  |
| 6 | 3.356755000  | -1.526929000 | 0.810759000  |
| 6 | 2.798343000  | -2.042496000 | -0.360790000 |
| 6 | 4.202378000  | -2.331877000 | 1.576888000  |
| 6 | 3.088215000  | -3.342090000 | -0.763769000 |
| 1 | 2.133493000  | -1.424604000 | -0.956406000 |
| 6 | 4.489263000  | -3.633447000 | 1.175206000  |
| 1 | 4.645034000  | -1.936101000 | 2.487707000  |
| 6 | 3.931972000  | -4.141262000 | 0.004109000  |
| 1 | 2.648747000  | -3.728286000 | -1.678301000 |
| 1 | 5.149484000  | -4.250566000 | 1.776926000  |
| 1 | 4.155455000  | -5.156774000 | -0.308157000 |

A7

-----  
Coordinates (Angstroms)

|   | X            | Y            | Z            |
|---|--------------|--------------|--------------|
| 6 | -1.830822000 | 1.313906000  | -0.055953000 |
| 6 | -0.504167000 | 1.137588000  | 0.323517000  |
| 6 | 0.041283000  | -0.144554000 | 0.427762000  |
| 6 | -0.763857000 | -1.245876000 | 0.129735000  |

|   |              |              |              |
|---|--------------|--------------|--------------|
| 6 | -2.090269000 | -1.071508000 | -0.255113000 |
| 6 | -2.627283000 | 0.209058000  | -0.347438000 |
| 1 | -2.243850000 | 2.315351000  | -0.126272000 |
| 1 | 0.115907000  | 2.001978000  | 0.545987000  |
| 1 | -0.350550000 | -2.248131000 | 0.208220000  |
| 1 | -2.704816000 | -1.937944000 | -0.479238000 |
| 1 | -3.663106000 | 0.346690000  | -0.641216000 |
| 6 | 1.497810000  | -0.323634000 | 0.793137000  |
| 1 | 1.839896000  | 0.433035000  | 1.503448000  |
| 1 | 1.651714000  | -1.312838000 | 1.243334000  |
| 6 | 2.371199000  | -0.256798000 | -0.441502000 |
| 8 | 3.342580000  | 0.452081000  | -0.553597000 |
| 1 | 2.050804000  | -0.923874000 | -1.270369000 |

**A8**

| -----                   |              |              |              |
|-------------------------|--------------|--------------|--------------|
| Coordinates (Angstroms) |              |              |              |
|                         | X            | Y            | Z            |
| -----                   |              |              |              |
| 19                      | 1.287287000  | -0.691944000 | -2.181290000 |
| 8                       | 3.110972000  | -0.036050000 | -0.789640000 |
| 6                       | 4.342660000  | 0.135251000  | -0.208819000 |
| 6                       | 4.583030000  | -0.929279000 | 0.885255000  |
| 1                       | 4.513941000  | -1.932395000 | 0.448251000  |
| 1                       | 5.563007000  | -0.833709000 | 1.370710000  |
| 1                       | 3.811650000  | -0.846594000 | 1.660470000  |
| 6                       | 5.453764000  | 0.001144000  | -1.271911000 |
| 1                       | 5.391173000  | -0.985840000 | -1.745426000 |
| 1                       | 5.312679000  | 0.758522000  | -2.052000000 |
| 1                       | 6.463666000  | 0.119839000  | -0.858059000 |
| 6                       | 4.453004000  | 1.531233000  | 0.443895000  |
| 1                       | 3.677377000  | 1.645054000  | 1.211465000  |
| 1                       | 5.427177000  | 1.706988000  | 0.918357000  |
| 1                       | 4.295579000  | 2.310070000  | -0.311392000 |
| 6                       | -1.655296000 | -0.276434000 | -0.778298000 |
| 8                       | -1.306880000 | -1.079853000 | -1.625596000 |
| 6                       | -2.434368000 | -0.640424000 | 0.457313000  |
| 1                       | -2.020086000 | -0.085967000 | 1.303527000  |
| 1                       | -2.330400000 | -1.712462000 | 0.643150000  |
| 7                       | 0.771311000  | 0.189082000  | 0.665140000  |
| 6                       | 0.772754000  | -0.818402000 | 1.715455000  |
| 1                       | 1.552783000  | -0.617314000 | 2.474199000  |
| 1                       | -0.184849000 | -0.801012000 | 2.255984000  |
| 6                       | 1.003305000  | -2.202588000 | 1.115508000  |
| 1                       | 0.182277000  | -2.428667000 | 0.422317000  |

|   |              |              |              |
|---|--------------|--------------|--------------|
| 1 | 1.926220000  | -2.157239000 | 0.522963000  |
| 6 | 1.115414000  | -3.298296000 | 2.169688000  |
| 1 | 0.205779000  | -3.359581000 | 2.778073000  |
| 1 | 1.273726000  | -4.278614000 | 1.710053000  |
| 1 | 1.955843000  | -3.108416000 | 2.845830000  |
| 6 | 0.606405000  | 1.545822000  | 1.161054000  |
| 1 | -0.399455000 | 1.668537000  | 1.594488000  |
| 1 | 1.318790000  | 1.772104000  | 1.977115000  |
| 6 | 0.818321000  | 2.553330000  | 0.033504000  |
| 1 | 0.026931000  | 2.426926000  | -0.718120000 |
| 1 | 1.765168000  | 2.304953000  | -0.461190000 |
| 6 | 0.838146000  | 3.997329000  | 0.522430000  |
| 1 | 0.970966000  | 4.698228000  | -0.307253000 |
| 1 | -0.095779000 | 4.259853000  | 1.032646000  |
| 1 | 1.659317000  | 4.160480000  | 1.228699000  |
| 6 | -3.883527000 | -0.250865000 | 0.239302000  |
| 6 | -4.398994000 | 0.930149000  | 0.775422000  |
| 6 | -4.710010000 | -1.054565000 | -0.550496000 |
| 6 | -5.721711000 | 1.295365000  | 0.538506000  |
| 1 | -3.763689000 | 1.562521000  | 1.390143000  |
| 6 | -6.031379000 | -0.691979000 | -0.786105000 |
| 1 | -4.312139000 | -1.970143000 | -0.979512000 |
| 6 | -6.540765000 | 0.484734000  | -0.241571000 |
| 1 | -6.113252000 | 2.212390000  | 0.967773000  |
| 1 | -6.664759000 | -1.328494000 | -1.396072000 |
| 1 | -7.573264000 | 0.765993000  | -0.423238000 |
| 1 | -1.511155000 | 0.808282000  | -0.932637000 |
| 1 | 1.719921000  | 0.147146000  | 0.218317000  |

**A9**

| -----                   |              |             |              |
|-------------------------|--------------|-------------|--------------|
| Coordinates (Angstroms) |              |             |              |
|                         | X            | Y           | Z            |
| -----                   |              |             |              |
| 19                      | -2.221246000 | 1.487765000 | -0.661045000 |
| 8                       | 0.211771000  | 2.559896000 | -0.775486000 |
| 6                       | 1.040397000  | 3.007523000 | 0.284120000  |
| 6                       | 2.426593000  | 2.368250000 | 0.158702000  |
| 1                       | 2.876473000  | 2.638674000 | -0.802247000 |
| 1                       | 3.096153000  | 2.705994000 | 0.957837000  |
| 1                       | 2.345249000  | 1.275522000 | 0.203034000  |
| 6                       | 1.134135000  | 4.527088000 | 0.158098000  |
| 1                       | 1.571065000  | 4.799245000 | -0.807269000 |
| 1                       | 0.139226000  | 4.981780000 | 0.221849000  |
| 1                       | 1.756416000  | 4.953023000 | 0.952165000  |
| 6                       | 0.408441000  | 2.632443000 | 1.632964000  |

|   |              |              |              |
|---|--------------|--------------|--------------|
| 1 | 0.290450000  | 1.546566000  | 1.710609000  |
| 1 | 1.023265000  | 2.962552000  | 2.477270000  |
| 1 | -0.578048000 | 3.102439000  | 1.738889000  |
| 6 | 0.167861000  | -0.768627000 | -0.056905000 |
| 8 | -0.160431000 | 0.065627000  | -1.062040000 |
| 6 | -0.733563000 | -2.057579000 | -0.081609000 |
| 1 | -0.485725000 | -2.708431000 | 0.765219000  |
| 1 | -0.528320000 | -2.607824000 | -1.005584000 |
| 7 | 1.613493000  | -1.093289000 | -0.061138000 |
| 6 | 2.089719000  | -1.570314000 | -1.351521000 |
| 1 | 2.100317000  | -2.676910000 | -1.402129000 |
| 1 | 1.376962000  | -1.210829000 | -2.098915000 |
| 6 | 3.477301000  | -1.033333000 | -1.703449000 |
| 1 | 3.415843000  | 0.059718000  | -1.744984000 |
| 1 | 4.192366000  | -1.275925000 | -0.907048000 |
| 6 | 3.992896000  | -1.582238000 | -3.030814000 |
| 1 | 3.302773000  | -1.346303000 | -3.848695000 |
| 1 | 4.968709000  | -1.157891000 | -3.286743000 |
| 1 | 4.103589000  | -2.672183000 | -2.995488000 |
| 6 | 2.103931000  | -1.891038000 | 1.049370000  |
| 1 | 1.664131000  | -2.909202000 | 1.067885000  |
| 1 | 3.179757000  | -2.040155000 | 0.895558000  |
| 6 | 1.918662000  | -1.246542000 | 2.423950000  |
| 1 | 0.855661000  | -1.204853000 | 2.687990000  |
| 1 | 2.271058000  | -0.209460000 | 2.372903000  |
| 6 | 2.670729000  | -2.005783000 | 3.513860000  |
| 1 | 2.520156000  | -1.545951000 | 4.495473000  |
| 1 | 2.332023000  | -3.045950000 | 3.579413000  |
| 1 | 3.748128000  | -2.020831000 | 3.315406000  |
| 6 | -2.175323000 | -1.655595000 | -0.018634000 |
| 6 | -2.731806000 | -1.192882000 | 1.182602000  |
| 6 | -2.967249000 | -1.595386000 | -1.172783000 |
| 6 | -4.022960000 | -0.667558000 | 1.226469000  |
| 1 | -2.140684000 | -1.238569000 | 2.093776000  |
| 6 | -4.262032000 | -1.080305000 | -1.134410000 |
| 1 | -2.552018000 | -1.944048000 | -2.113481000 |
| 6 | -4.793631000 | -0.602118000 | 0.064683000  |
| 1 | -4.430960000 | -0.315001000 | 2.169312000  |
| 1 | -4.856533000 | -1.050061000 | -2.043004000 |
| 1 | -5.801894000 | -0.201132000 | 0.097641000  |
| 1 | -0.009169000 | -0.324426000 | 0.951005000  |
| 1 | 0.287472000  | 1.545692000  | -0.877769000 |

---

**A10**

| -----                   |              |              |              |
|-------------------------|--------------|--------------|--------------|
| Coordinates (Angstroms) |              |              |              |
|                         | X            | Y            | Z            |
| -----                   |              |              |              |
| 19                      | -2.117866000 | -1.550333000 | 0.842279000  |
| 8                       | 0.209368000  | -2.212314000 | 0.676406000  |
| 6                       | 1.394592000  | -2.907606000 | 0.504726000  |
| 6                       | 2.584798000  | -2.082585000 | 1.029922000  |
| 1                       | 2.456029000  | -1.887730000 | 2.100951000  |
| 1                       | 3.543416000  | -2.596990000 | 0.888971000  |
| 1                       | 2.628297000  | -1.113130000 | 0.521535000  |
| 6                       | 1.328096000  | -4.238359000 | 1.276041000  |
| 1                       | 1.164586000  | -4.042286000 | 2.341551000  |
| 1                       | 0.488779000  | -4.842418000 | 0.910964000  |
| 1                       | 2.245571000  | -4.830877000 | 1.172119000  |
| 6                       | 1.608622000  | -3.207203000 | -0.990956000 |
| 1                       | 1.633815000  | -2.267644000 | -1.551278000 |
| 1                       | 2.540914000  | -3.751101000 | -1.188859000 |
| 1                       | 0.774318000  | -3.806582000 | -1.374673000 |
| 6                       | 0.269855000  | 0.851510000  | -0.146772000 |
| 8                       | -0.007168000 | 0.180120000  | 1.030106000  |
| 6                       | -0.793116000 | 1.964096000  | -0.341597000 |
| 1                       | -0.554671000 | 2.545348000  | -1.239864000 |
| 1                       | -0.758900000 | 2.646283000  | 0.512965000  |
| 7                       | 1.652971000  | 1.341175000  | -0.211669000 |
| 6                       | 1.982801000  | 2.447470000  | 0.685219000  |
| 1                       | 3.036184000  | 2.693486000  | 0.503007000  |
| 1                       | 1.415673000  | 3.367480000  | 0.440902000  |
| 6                       | 1.830742000  | 2.147383000  | 2.175303000  |
| 1                       | 0.783891000  | 1.951366000  | 2.415412000  |
| 1                       | 2.368617000  | 1.219906000  | 2.397698000  |
| 6                       | 2.368187000  | 3.294429000  | 3.027552000  |
| 1                       | 1.841240000  | 4.232564000  | 2.816374000  |
| 1                       | 2.247931000  | 3.083508000  | 4.094616000  |
| 1                       | 3.434582000  | 3.467708000  | 2.842283000  |
| 6                       | 2.107158000  | 1.608072000  | -1.574302000 |
| 1                       | 1.433342000  | 2.296880000  | -2.121514000 |
| 1                       | 3.065073000  | 2.134660000  | -1.498054000 |
| 6                       | 2.340180000  | 0.356337000  | -2.420123000 |
| 1                       | 1.399669000  | -0.180035000 | -2.588510000 |
| 1                       | 2.989596000  | -0.322542000 | -1.857390000 |
| 6                       | 2.967972000  | 0.690548000  | -3.770865000 |
| 1                       | 3.137175000  | -0.215659000 | -4.359848000 |
| 1                       | 2.323811000  | 1.353441000  | -4.359881000 |
| 1                       | 3.934362000  | 1.191788000  | -3.647269000 |
| 6                       | -2.170999000 | 1.374437000  | -0.466432000 |



|   |              |              |              |
|---|--------------|--------------|--------------|
| 6 | -2.516959000 | 0.613457000  | -1.591609000 |
| 6 | -3.112134000 | 1.494733000  | 0.562339000  |
| 6 | -3.754440000 | -0.021174000 | -1.679523000 |
| 1 | -1.801711000 | 0.511845000  | -2.403680000 |
| 6 | -4.355227000 | 0.867406000  | 0.477805000  |
| 1 | -2.860013000 | 2.077078000  | 1.444056000  |
| 6 | -4.679274000 | 0.099281000  | -0.641035000 |
| 1 | -3.999849000 | -0.604589000 | -2.561812000 |
| 1 | -5.073003000 | 0.979905000  | 1.285015000  |
| 1 | -5.647101000 | -0.386970000 | -0.711023000 |
| 1 | 0.175541000  | 0.156728000  | -0.997537000 |
| 1 | 0.278783000  | -0.849160000 | 0.904916000  |

## A11

### Coordinates (Angstroms)

|   | X            | Y            | Z            |
|---|--------------|--------------|--------------|
| 6 | 0.416167000  | 0.242130000  | 1.273706000  |
| 8 | -0.031703000 | -0.963303000 | 1.843422000  |
| 7 | 1.182286000  | -0.043379000 | 0.066606000  |
| 6 | 2.234142000  | -1.045259000 | 0.277461000  |
| 1 | 2.364459000  | -1.242512000 | 1.348135000  |
| 1 | 3.195158000  | -0.655320000 | -0.084009000 |
| 6 | 1.627413000  | 1.109230000  | -0.710112000 |
| 1 | 2.180902000  | 0.717478000  | -1.571561000 |
| 1 | 0.755323000  | 1.622052000  | -1.134360000 |
| 6 | -0.772761000 | 1.192843000  | 1.032416000  |
| 1 | -0.437462000 | 2.105582000  | 0.530488000  |
| 1 | -1.122136000 | 1.500918000  | 2.022138000  |
| 6 | -1.936163000 | 0.573941000  | 0.285513000  |
| 6 | -3.211379000 | 0.589687000  | 0.858808000  |
| 6 | -1.783897000 | -0.029635000 | -0.969690000 |
| 6 | -4.305301000 | 0.034964000  | 0.201461000  |
| 1 | -3.347914000 | 1.044581000  | 1.836404000  |
| 6 | -2.875882000 | -0.590742000 | -1.626609000 |
| 1 | -0.797338000 | -0.086997000 | -1.415785000 |
| 6 | -4.140679000 | -0.557812000 | -1.046799000 |
| 1 | -5.285086000 | 0.062058000  | 0.668537000  |
| 1 | -2.734753000 | -1.058167000 | -2.596595000 |
| 1 | -4.990899000 | -0.995789000 | -1.560522000 |
| 6 | 2.503269000  | 2.131335000  | 0.026742000  |
| 1 | 3.355884000  | 1.617812000  | 0.487845000  |
| 1 | 1.933819000  | 2.582774000  | 0.848388000  |
| 6 | 3.003696000  | 3.228874000  | -0.907500000 |

|   |              |              |              |
|---|--------------|--------------|--------------|
| 1 | 3.613759000  | 3.961906000  | -0.371658000 |
| 1 | 3.615810000  | 2.812520000  | -1.715168000 |
| 1 | 2.167905000  | 3.765823000  | -1.369741000 |
| 6 | 1.928034000  | -2.357532000 | -0.441775000 |
| 1 | 1.761156000  | -2.146729000 | -1.505327000 |
| 1 | 0.985130000  | -2.754357000 | -0.049666000 |
| 6 | 3.039674000  | -3.389090000 | -0.277340000 |
| 1 | 2.795490000  | -4.325661000 | -0.787501000 |
| 1 | 3.985630000  | -3.022551000 | -0.692446000 |
| 1 | 3.210501000  | -3.620668000 | 0.779835000  |
| 1 | -0.636840000 | -1.358704000 | 1.202489000  |
| 1 | 1.051124000  | 0.686425000  | 2.058768000  |

**A12**

Coordinates (Angstroms)

|    | X            | Y            | Z            |
|----|--------------|--------------|--------------|
| 44 | -1.140391000 | 0.207676000  | -0.940119000 |
| 6  | 0.534424000  | -2.156787000 | -1.658674000 |
| 6  | 1.438986000  | -2.983054000 | -2.326183000 |
| 6  | 2.251066000  | -2.455213000 | -3.318071000 |
| 6  | 2.137302000  | -1.105855000 | -3.637334000 |
| 6  | 1.200546000  | -0.346204000 | -2.955340000 |
| 7  | 0.419587000  | -0.850896000 | -1.989750000 |
| 1  | 2.960419000  | -3.090368000 | -3.838146000 |
| 1  | 1.503997000  | -4.033246000 | -2.070643000 |
| 1  | 2.749736000  | -0.647745000 | -4.404926000 |
| 1  | 1.056479000  | 0.705438000  | -3.175890000 |
| 6  | -0.332844000 | -2.634087000 | -0.549725000 |
| 6  | -0.168296000 | -3.862492000 | 0.057130000  |
| 6  | -1.049895000 | -4.181222000 | 1.116744000  |
| 6  | -2.009397000 | -3.297629000 | 1.519730000  |
| 6  | -2.138027000 | -2.011907000 | 0.882020000  |
| 7  | -1.273843000 | -1.752117000 | -0.161244000 |
| 1  | -0.955098000 | -5.140982000 | 1.617009000  |
| 1  | 0.606669000  | -4.554479000 | -0.244674000 |
| 1  | -2.682151000 | -3.541007000 | 2.335501000  |
| 6  | -3.052265000 | -1.039477000 | 1.264764000  |
| 15 | -3.086812000 | 0.478903000  | 0.346681000  |
| 6  | -1.012027000 | 1.939639000  | -1.592945000 |
| 8  | -0.930586000 | 3.023559000  | -2.011830000 |
| 6  | -3.161640000 | 1.868573000  | 1.637880000  |
| 6  | -1.761429000 | 1.955886000  | 2.263962000  |
| 6  | -3.472071000 | 3.223529000  | 0.989155000  |
| 6  | -4.153355000 | 1.591893000  | 2.778739000  |

|   |              |              |              |
|---|--------------|--------------|--------------|
| 1 | -1.479704000 | 0.997626000  | 2.718761000  |
| 1 | -1.016820000 | 2.251715000  | 1.520476000  |
| 1 | -1.759904000 | 2.710085000  | 3.059544000  |
| 1 | -4.504005000 | 3.289371000  | 0.635597000  |
| 1 | -3.334029000 | 4.021286000  | 1.729628000  |
| 1 | -2.804362000 | 3.435274000  | 0.147967000  |
| 1 | -4.071101000 | 2.390119000  | 3.527276000  |
| 1 | -5.192070000 | 1.565567000  | 2.448459000  |
| 1 | -3.929357000 | 0.646919000  | 3.281849000  |
| 6 | -4.680815000 | 0.496282000  | -0.696635000 |
| 6 | -4.592620000 | 1.555350000  | -1.806025000 |
| 6 | -4.786372000 | -0.891710000 | -1.351868000 |
| 6 | -5.956664000 | 0.714300000  | 0.127677000  |
| 1 | -4.473687000 | 2.569249000  | -1.417026000 |
| 1 | -3.755878000 | 1.352134000  | -2.478583000 |
| 1 | -5.516294000 | 1.538013000  | -2.398453000 |
| 1 | -4.967885000 | -1.671637000 | -0.607356000 |
| 1 | -5.622863000 | -0.890091000 | -2.061608000 |
| 1 | -3.877794000 | -1.154138000 | -1.900126000 |
| 1 | -6.831459000 | 0.537635000  | -0.510513000 |
| 1 | -6.021732000 | 0.015261000  | 0.968080000  |
| 1 | -6.042632000 | 1.734179000  | 0.511767000  |
| 6 | 1.849904000  | 0.684885000  | 0.635097000  |
| 8 | 0.473743000  | 0.290978000  | 0.770699000  |
| 1 | -2.094706000 | -0.102699000 | -2.142320000 |
| 7 | 2.771910000  | -0.246915000 | 1.214927000  |
| 6 | 2.513330000  | -0.607572000 | 2.610271000  |
| 1 | 2.199871000  | 0.305496000  | 3.126808000  |
| 1 | 3.464286000  | -0.889627000 | 3.078982000  |
| 6 | 1.468655000  | -1.722210000 | 2.876145000  |
| 1 | 0.731092000  | -1.734904000 | 2.068778000  |
| 1 | 0.921050000  | -1.462188000 | 3.790454000  |
| 6 | 2.052653000  | -3.123070000 | 3.055085000  |
| 1 | 2.802744000  | -3.140383000 | 3.854217000  |
| 1 | 1.265695000  | -3.835735000 | 3.321120000  |
| 1 | 2.530772000  | -3.491667000 | 2.142648000  |
| 6 | 3.129155000  | -1.365901000 | 0.351209000  |
| 1 | 3.134315000  | -1.000242000 | -0.681801000 |
| 1 | 2.377190000  | -2.169814000 | 0.388969000  |
| 6 | 4.509282000  | -1.942415000 | 0.654067000  |
| 1 | 5.253294000  | -1.144001000 | 0.553880000  |
| 1 | 4.557249000  | -2.291025000 | 1.692101000  |
| 6 | 4.838785000  | -3.104595000 | -0.278796000 |
| 1 | 4.825621000  | -2.786685000 | -1.327533000 |

|   |              |              |              |
|---|--------------|--------------|--------------|
| 1 | 5.828999000  | -3.519190000 | -0.068369000 |
| 1 | 4.108920000  | -3.915449000 | -0.169949000 |
| 1 | -3.787913000 | -1.278432000 | 2.025692000  |
| 1 | 0.148418000  | 0.502485000  | 1.651041000  |
| 6 | 2.023578000  | 2.129401000  | 1.126301000  |
| 1 | 1.180642000  | 2.704670000  | 0.730295000  |
| 1 | 1.960126000  | 2.174406000  | 2.219881000  |
| 6 | 3.317395000  | 2.729624000  | 0.636893000  |
| 6 | 4.531665000  | 2.454631000  | 1.271792000  |
| 6 | 3.324771000  | 3.536959000  | -0.503090000 |
| 6 | 5.723330000  | 2.979016000  | 0.780725000  |
| 1 | 4.539890000  | 1.817946000  | 2.151302000  |
| 6 | 4.516000000  | 4.061319000  | -0.998976000 |
| 1 | 2.385831000  | 3.757904000  | -1.005547000 |
| 6 | 5.719294000  | 3.784502000  | -0.356525000 |
| 1 | 6.658520000  | 2.760394000  | 1.287812000  |
| 1 | 4.501913000  | 4.689876000  | -1.884548000 |
| 1 | 6.648899000  | 4.195169000  | -0.738866000 |
| 1 | 2.014956000  | 0.683110000  | -0.443693000 |

### A13

| -----                   |              |              |              |
|-------------------------|--------------|--------------|--------------|
| Coordinates (Angstroms) |              |              |              |
|                         | X            | Y            | Z            |
| -----                   |              |              |              |
| 44                      | -1.028872000 | -1.284196000 | -0.447156000 |
| 6                       | 1.148774000  | -2.306037000 | 1.337185000  |
| 6                       | 2.132318000  | -3.138987000 | 1.866279000  |
| 6                       | 2.651407000  | -4.163934000 | 1.087964000  |
| 6                       | 2.176103000  | -4.330712000 | -0.206986000 |
| 6                       | 1.197938000  | -3.464103000 | -0.671972000 |
| 7                       | 0.690405000  | -2.475386000 | 0.074576000  |
| 1                       | 3.413974000  | -4.823029000 | 1.488515000  |
| 1                       | 2.483972000  | -2.996398000 | 2.880652000  |
| 1                       | 2.552388000  | -5.112942000 | -0.855542000 |
| 1                       | 0.794064000  | -3.556221000 | -1.673136000 |
| 6                       | 0.543439000  | -1.182629000 | 2.096627000  |
| 6                       | 0.986957000  | -0.736393000 | 3.337994000  |
| 6                       | 0.357624000  | 0.362345000  | 3.912333000  |
| 6                       | -0.657725000 | 1.015358000  | 3.225821000  |
| 6                       | -1.043289000 | 0.537802000  | 1.974797000  |
| 7                       | -0.473059000 | -0.565751000 | 1.471100000  |
| 1                       | 0.682185000  | 0.726434000  | 4.881475000  |
| 1                       | 1.815412000  | -1.216467000 | 3.843280000  |
| 1                       | -1.130769000 | 1.899511000  | 3.637761000  |

|    |              |              |              |
|----|--------------|--------------|--------------|
| 6  | -2.016007000 | 1.258886000  | 1.084015000  |
| 15 | -2.845649000 | 0.111390000  | -0.128666000 |
| 6  | -1.475331000 | -1.937472000 | -2.120315000 |
| 8  | -1.749815000 | -2.372786000 | -3.162713000 |
| 6  | -3.454767000 | 1.247093000  | -1.517358000 |
| 6  | -2.307544000 | 1.362270000  | -2.540855000 |
| 6  | -4.657823000 | 0.636383000  | -2.251911000 |
| 6  | -3.814904000 | 2.648660000  | -0.999240000 |
| 1  | -1.321159000 | 1.459065000  | -2.078330000 |
| 1  | -2.265589000 | 0.468181000  | -3.169906000 |
| 1  | -2.502582000 | 2.220910000  | -3.195069000 |
| 1  | -5.581251000 | 0.650673000  | -1.668018000 |
| 1  | -4.838960000 | 1.222340000  | -3.160593000 |
| 1  | -4.457957000 | -0.392311000 | -2.567360000 |
| 1  | -4.217736000 | 3.241514000  | -1.828732000 |
| 1  | -4.572106000 | 2.630954000  | -0.211143000 |
| 1  | -2.935241000 | 3.179118000  | -0.622481000 |
| 6  | -4.300626000 | -0.594437000 | 0.854201000  |
| 6  | -4.925217000 | -1.766975000 | 0.081538000  |
| 6  | -3.746312000 | -1.145184000 | 2.181158000  |
| 6  | -5.372274000 | 0.451444000  | 1.193141000  |
| 1  | -5.442439000 | -1.445988000 | -0.824225000 |
| 1  | -4.163214000 | -2.500650000 | -0.197044000 |
| 1  | -5.663169000 | -2.266783000 | 0.720134000  |
| 1  | -3.375885000 | -0.351803000 | 2.837650000  |
| 1  | -4.558561000 | -1.652067000 | 2.715233000  |
| 1  | -2.944642000 | -1.869842000 | 2.018015000  |
| 1  | -6.131313000 | -0.009964000 | 1.836226000  |
| 1  | -4.957257000 | 1.302367000  | 1.743486000  |
| 1  | -5.887174000 | 0.834145000  | 0.309942000  |
| 6  | 1.460470000  | 0.638492000  | -0.732748000 |
| 8  | 0.124098000  | 0.569536000  | -0.976842000 |
| 1  | -1.865446000 | -2.517678000 | 0.163080000  |
| 7  | 1.949012000  | 1.986192000  | -0.392904000 |
| 6  | 1.666919000  | 3.036228000  | -1.362590000 |
| 1  | 1.770634000  | 2.586741000  | -2.353080000 |
| 1  | 2.457667000  | 3.799273000  | -1.298602000 |
| 6  | 0.295632000  | 3.750039000  | -1.302924000 |
| 1  | -0.444968000 | 3.028899000  | -0.951218000 |
| 1  | 0.002562000  | 4.006979000  | -2.328358000 |
| 6  | 0.249437000  | 5.026558000  | -0.462650000 |
| 1  | 1.011245000  | 5.743097000  | -0.791895000 |
| 1  | -0.724101000 | 5.521408000  | -0.555896000 |
| 1  | 0.418940000  | 4.834898000  | 0.601273000  |

|   |              |              |              |
|---|--------------|--------------|--------------|
| 6 | 1.731764000  | 2.351541000  | 0.989760000  |
| 1 | 1.828062000  | 1.438851000  | 1.588442000  |
| 1 | 0.708850000  | 2.727974000  | 1.184576000  |
| 6 | 2.746809000  | 3.362233000  | 1.522858000  |
| 1 | 3.750819000  | 2.953607000  | 1.361923000  |
| 1 | 2.693168000  | 4.297126000  | 0.953151000  |
| 6 | 2.519898000  | 3.659712000  | 3.002904000  |
| 1 | 2.605266000  | 2.747196000  | 3.604520000  |
| 1 | 3.248724000  | 4.380801000  | 3.386124000  |
| 1 | 1.520061000  | 4.076388000  | 3.175192000  |
| 1 | -2.697397000 | 1.894060000  | 1.655489000  |
| 1 | -1.389178000 | 1.886240000  | 0.438715000  |
| 6 | 2.297056000  | 0.043150000  | -1.901775000 |
| 1 | 1.865881000  | -0.942575000 | -2.104909000 |
| 1 | 2.149719000  | 0.641032000  | -2.807490000 |
| 6 | 3.757012000  | -0.082986000 | -1.563383000 |
| 6 | 4.645876000  | 0.981108000  | -1.751787000 |
| 6 | 4.249595000  | -1.249028000 | -0.971471000 |
| 6 | 5.980294000  | 0.878336000  | -1.372473000 |
| 1 | 4.280305000  | 1.901128000  | -2.198491000 |
| 6 | 5.583231000  | -1.358168000 | -0.584545000 |
| 1 | 3.573551000  | -2.084711000 | -0.813830000 |
| 6 | 6.456545000  | -0.293439000 | -0.785831000 |
| 1 | 6.653135000  | 1.716017000  | -1.533651000 |
| 1 | 5.940367000  | -2.278090000 | -0.129210000 |
| 1 | 7.498871000  | -0.374911000 | -0.491598000 |
| 1 | 1.764936000  | 0.037000000  | 0.150243000  |

#### A14

-----  
Coordinates (Angstroms)

|    | X            | Y            | Z            |
|----|--------------|--------------|--------------|
| 44 | -1.355962000 | 1.139316000  | -0.710849000 |
| 6  | 0.958015000  | 0.457689000  | -2.465244000 |
| 6  | 2.184954000  | 0.552037000  | -3.120172000 |
| 6  | 2.799109000  | 1.789196000  | -3.242376000 |
| 6  | 2.169221000  | 2.906895000  | -2.709079000 |
| 6  | 0.961526000  | 2.739104000  | -2.050996000 |
| 7  | 0.369861000  | 1.545415000  | -1.913489000 |
| 1  | 3.757360000  | 1.877048000  | -3.742881000 |
| 1  | 2.668731000  | -0.337340000 | -3.499914000 |
| 1  | 2.608865000  | 3.894669000  | -2.780929000 |
| 1  | 0.445325000  | 3.577216000  | -1.599264000 |
| 6  | 0.215545000  | -0.814745000 | -2.328212000 |
| 6  | 0.625185000  | -2.026613000 | -2.878748000 |

|    |              |              |              |
|----|--------------|--------------|--------------|
| 6  | -0.181654000 | -3.142858000 | -2.709070000 |
| 6  | -1.382363000 | -3.026448000 | -2.017621000 |
| 6  | -1.745272000 | -1.789746000 | -1.493962000 |
| 7  | -0.934263000 | -0.727375000 | -1.632920000 |
| 1  | 0.122941000  | -4.098979000 | -3.121444000 |
| 1  | 1.566380000  | -2.107395000 | -3.403712000 |
| 1  | -2.039618000 | -3.879357000 | -1.889691000 |
| 6  | -3.065882000 | -1.548944000 | -0.812462000 |
| 15 | -3.003351000 | -0.079139000 | 0.337160000  |
| 6  | -1.688938000 | 2.777113000  | 0.085748000  |
| 8  | -1.882192000 | 3.807407000  | 0.594048000  |
| 6  | -2.530238000 | -0.860774000 | 2.004415000  |
| 6  | -1.331024000 | -1.786963000 | 1.735641000  |
| 6  | -2.064972000 | 0.245693000  | 2.964700000  |
| 6  | -3.630199000 | -1.699150000 | 2.668113000  |
| 1  | -1.606440000 | -2.673830000 | 1.155425000  |
| 1  | -0.529948000 | -1.253691000 | 1.217721000  |
| 1  | -0.939853000 | -2.141422000 | 2.696808000  |
| 1  | -2.867701000 | 0.938542000  | 3.230316000  |
| 1  | -1.703293000 | -0.212209000 | 3.893826000  |
| 1  | -1.246452000 | 0.819506000  | 2.522314000  |
| 1  | -3.205483000 | -2.212587000 | 3.539214000  |
| 1  | -4.463236000 | -1.092551000 | 3.031269000  |
| 1  | -4.025603000 | -2.470710000 | 1.998666000  |
| 6  | -4.803255000 | 0.511606000  | 0.377740000  |
| 6  | -4.980345000 | 1.485497000  | 1.553185000  |
| 6  | -5.072196000 | 1.289891000  | -0.921268000 |
| 6  | -5.840151000 | -0.619584000 | 0.472331000  |
| 1  | -4.944200000 | 0.981878000  | 2.522507000  |
| 1  | -4.219213000 | 2.271790000  | 1.542736000  |
| 1  | -5.959381000 | 1.972308000  | 1.473409000  |
| 1  | -4.912904000 | 0.682245000  | -1.816956000 |
| 1  | -6.118148000 | 1.620472000  | -0.920212000 |
| 1  | -4.424801000 | 2.163728000  | -1.009056000 |
| 1  | -6.843497000 | -0.181902000 | 0.409945000  |
| 1  | -5.751481000 | -1.333348000 | -0.352950000 |
| 1  | -5.788118000 | -1.173520000 | 1.408988000  |
| 6  | 3.549733000  | -1.326939000 | -0.244768000 |
| 8  | 3.334194000  | -1.777323000 | -1.370988000 |
| 1  | -3.787629000 | -1.279767000 | -1.592699000 |
| 7  | 2.909788000  | -1.823447000 | 0.847530000  |
| 6  | 1.914382000  | -2.867890000 | 0.632301000  |
| 1  | 1.331612000  | -2.610412000 | -0.255704000 |
| 1  | 1.230989000  | -2.856648000 | 1.485473000  |

|   |              |              |              |
|---|--------------|--------------|--------------|
| 6 | 2.514882000  | -4.262671000 | 0.466217000  |
| 1 | 3.113169000  | -4.512300000 | 1.351527000  |
| 1 | 3.193423000  | -4.248561000 | -0.392021000 |
| 6 | 1.425663000  | -5.311388000 | 0.260035000  |
| 1 | 0.833989000  | -5.086623000 | -0.634556000 |
| 1 | 1.851977000  | -6.311472000 | 0.137380000  |
| 1 | 0.735954000  | -5.342919000 | 1.111411000  |
| 6 | 3.185010000  | -1.439817000 | 2.227430000  |
| 1 | 4.043883000  | -0.769313000 | 2.239976000  |
| 1 | 3.482336000  | -2.336806000 | 2.787275000  |
| 6 | 2.002618000  | -0.752845000 | 2.926354000  |
| 1 | 1.466840000  | -0.135320000 | 2.199249000  |
| 1 | 1.290773000  | -1.504214000 | 3.285589000  |
| 6 | 4.566664000  | -0.201266000 | -0.064212000 |
| 1 | 5.430469000  | -0.584287000 | 0.492120000  |
| 1 | 4.918737000  | 0.013632000  | -1.076692000 |
| 6 | 4.060829000  | 1.070525000  | 0.587761000  |
| 6 | 4.948028000  | 1.916688000  | 1.260217000  |
| 6 | 2.715472000  | 1.431002000  | 0.524926000  |
| 6 | 4.498076000  | 3.094288000  | 1.851298000  |
| 1 | 6.000142000  | 1.649524000  | 1.326592000  |
| 6 | 2.258311000  | 2.599646000  | 1.126240000  |
| 1 | 1.992697000  | 0.783469000  | 0.038382000  |
| 6 | 3.148699000  | 3.438815000  | 1.788981000  |
| 1 | 5.201059000  | 3.738153000  | 2.371770000  |
| 1 | 1.197202000  | 2.827516000  | 1.078842000  |
| 1 | 2.793873000  | 4.349853000  | 2.261163000  |
| 6 | 2.465265000  | 0.116187000  | 4.091140000  |
| 1 | 3.109311000  | 0.927531000  | 3.733858000  |
| 1 | 1.611257000  | 0.569211000  | 4.603133000  |
| 1 | 3.029878000  | -0.464561000 | 4.830121000  |
| 1 | -3.435333000 | -2.457428000 | -0.328020000 |
| 1 | -0.267995000 | 0.739289000  | 0.517148000  |
| 1 | -2.374126000 | 1.466859000  | -2.029308000 |

## A15

Coordinates (Angstroms)

|    | X            | Y            | Z            |
|----|--------------|--------------|--------------|
| 44 | -0.392026000 | -0.804343000 | -0.035622000 |
| 6  | -3.174125000 | 0.287766000  | -0.038552000 |
| 6  | -4.565030000 | 0.361613000  | 0.032225000  |
| 6  | -5.307320000 | -0.804331000 | 0.142338000  |
| 6  | -4.639369000 | -2.022741000 | 0.174467000  |



|    |              |              |              |
|----|--------------|--------------|--------------|
| 6  | -3.255861000 | -2.025439000 | 0.097458000  |
| 7  | -2.531968000 | -0.902931000 | -0.003656000 |
| 1  | -6.389622000 | -0.760500000 | 0.200222000  |
| 1  | -5.067272000 | 1.320438000  | -0.004594000 |
| 1  | -5.173179000 | -2.962238000 | 0.257208000  |
| 1  | -2.691865000 | -2.949901000 | 0.116232000  |
| 6  | -2.309394000 | 1.481169000  | -0.178647000 |
| 6  | -2.775143000 | 2.794023000  | -0.199100000 |
| 6  | -1.861547000 | 3.825080000  | -0.370619000 |
| 6  | -0.516362000 | 3.527399000  | -0.551012000 |
| 6  | -0.107337000 | 2.197874000  | -0.527877000 |
| 7  | -0.996013000 | 1.214599000  | -0.304719000 |
| 1  | -2.199887000 | 4.855868000  | -0.376773000 |
| 1  | -3.827700000 | 3.014500000  | -0.074226000 |
| 1  | 0.213875000  | 4.312201000  | -0.713214000 |
| 6  | 1.309551000  | 1.779450000  | -0.812261000 |
| 15 | 1.720500000  | 0.116486000  | -0.070275000 |
| 6  | 0.109605000  | -2.572545000 | 0.198429000  |
| 8  | 0.424278000  | -3.683189000 | 0.346722000  |
| 6  | 2.466783000  | 0.568831000  | 1.618902000  |
| 6  | 1.512168000  | 1.583780000  | 2.274703000  |
| 6  | 2.505306000  | -0.692417000 | 2.495748000  |
| 6  | 3.861392000  | 1.205732000  | 1.569190000  |
| 1  | 1.550922000  | 2.562007000  | 1.784299000  |
| 1  | 0.480443000  | 1.222312000  | 2.273748000  |
| 1  | 1.816062000  | 1.732778000  | 3.317404000  |
| 1  | 3.187308000  | -1.452700000 | 2.106269000  |
| 1  | 2.853556000  | -0.422635000 | 3.500210000  |
| 1  | 1.509917000  | -1.134616000 | 2.583699000  |
| 1  | 4.132266000  | 1.539136000  | 2.578351000  |
| 1  | 4.633855000  | 0.504046000  | 1.246261000  |
| 1  | 3.894798000  | 2.086891000  | 0.919690000  |
| 6  | 3.071934000  | -0.538056000 | -1.230025000 |
| 6  | 3.779934000  | -1.723809000 | -0.556405000 |
| 6  | 2.391559000  | -1.063998000 | -2.505055000 |
| 6  | 4.102341000  | 0.521566000  | -1.654701000 |
| 1  | 4.407922000  | -1.417984000 | 0.284070000  |
| 1  | 3.063455000  | -2.471356000 | -0.201491000 |
| 1  | 4.432656000  | -2.214679000 | -1.287762000 |
| 1  | 1.824088000  | -0.288854000 | -3.028900000 |
| 1  | 3.167550000  | -1.430383000 | -3.188507000 |
| 1  | 1.697545000  | -1.876911000 | -2.287685000 |
| 1  | 4.809894000  | 0.064260000  | -2.356615000 |
| 1  | 3.634770000  | 1.362431000  | -2.176755000 |

|   |              |              |              |
|---|--------------|--------------|--------------|
| 1 | 4.684063000  | 0.918389000  | -0.823398000 |
| 1 | 1.389560000  | 1.644814000  | -1.897657000 |
| 1 | 2.019325000  | 2.562518000  | -0.531366000 |
| 1 | -0.500296000 | -0.585759000 | 1.638857000  |
| 1 | -0.405191000 | -0.952108000 | -1.726461000 |

**A16**

Coordinates (Angstroms)

|    | X            | Y            | Z            |
|----|--------------|--------------|--------------|
| 44 | 0.319754000  | -0.912774000 | -0.887880000 |
| 6  | -2.378463000 | -2.001216000 | -0.202550000 |
| 6  | -3.624873000 | -2.615826000 | -0.317739000 |
| 6  | -4.062398000 | -3.048386000 | -1.560354000 |
| 6  | -3.241454000 | -2.850586000 | -2.664436000 |
| 6  | -2.016569000 | -2.229018000 | -2.481195000 |
| 7  | -1.586727000 | -1.810920000 | -1.283417000 |
| 1  | -5.029335000 | -3.528482000 | -1.664694000 |
| 1  | -4.252685000 | -2.751063000 | 0.554276000  |
| 1  | -3.538552000 | -3.167870000 | -3.657258000 |
| 1  | -1.342469000 | -2.051936000 | -3.310225000 |
| 6  | -1.850797000 | -1.485298000 | 1.080723000  |
| 6  | -2.495682000 | -1.614754000 | 2.308711000  |
| 6  | -1.920360000 | -1.033273000 | 3.430451000  |
| 6  | -0.739090000 | -0.312894000 | 3.301436000  |
| 6  | -0.134230000 | -0.218633000 | 2.051748000  |
| 7  | -0.677283000 | -0.831846000 | 0.985339000  |
| 1  | -2.401077000 | -1.128525000 | 4.398153000  |
| 1  | -3.428429000 | -2.157275000 | 2.397078000  |
| 1  | -0.285935000 | 0.175260000  | 4.156912000  |
| 6  | 1.100600000  | 0.602791000  | 1.799817000  |
| 15 | 2.068505000  | -0.025135000 | 0.333254000  |
| 6  | 1.166195000  | -0.975424000 | -2.535633000 |
| 8  | 1.692673000  | -1.005607000 | -3.572731000 |
| 6  | 3.267044000  | -1.282862000 | 1.107133000  |
| 6  | 2.436367000  | -2.206142000 | 2.017238000  |
| 6  | 3.884385000  | -2.139027000 | -0.009860000 |
| 6  | 4.379806000  | -0.666207000 | 1.964859000  |
| 1  | 2.076919000  | -1.688469000 | 2.912628000  |
| 1  | 1.583607000  | -2.635600000 | 1.485039000  |
| 1  | 3.073097000  | -3.031610000 | 2.356770000  |
| 1  | 4.530835000  | -1.559699000 | -0.673513000 |
| 1  | 4.498007000  | -2.929158000 | 0.439775000  |
| 1  | 3.103242000  | -2.609695000 | -0.612455000 |
| 1  | 4.931206000  | -1.473673000 | 2.461597000  |

|   |              |              |              |
|---|--------------|--------------|--------------|
| 1 | 5.103800000  | -0.099050000 | 1.375552000  |
| 1 | 3.984245000  | -0.014753000 | 2.751225000  |
| 6 | 3.019352000  | 1.508783000  | -0.243499000 |
| 6 | 4.167586000  | 1.078822000  | -1.169152000 |
| 6 | 2.050922000  | 2.375350000  | -1.063624000 |
| 6 | 3.561820000  | 2.377995000  | 0.903526000  |
| 1 | 4.980035000  | 0.582244000  | -0.633065000 |
| 1 | 3.818221000  | 0.412511000  | -1.964231000 |
| 1 | 4.591061000  | 1.969249000  | -1.648411000 |
| 1 | 1.183710000  | 2.698467000  | -0.481285000 |
| 1 | 2.584199000  | 3.274653000  | -1.396365000 |
| 1 | 1.677916000  | 1.845078000  | -1.941418000 |
| 1 | 4.066840000  | 3.250338000  | 0.471826000  |
| 1 | 2.758289000  | 2.759775000  | 1.540715000  |
| 1 | 4.286899000  | 1.864598000  | 1.535228000  |
| 1 | 0.766621000  | 1.609425000  | 1.514471000  |
| 1 | 1.702219000  | 0.703074000  | 2.707776000  |
| 1 | 0.846318000  | -2.472706000 | -0.523660000 |
| 1 | -0.329580000 | 0.622973000  | -1.222763000 |
| 7 | -1.230926000 | 2.926193000  | 0.331051000  |
| 6 | -1.957688000 | 2.845259000  | 1.588980000  |
| 1 | -1.274816000 | 2.448771000  | 2.352938000  |
| 1 | -2.207142000 | 3.868531000  | 1.903692000  |
| 6 | -3.229055000 | 1.988797000  | 1.588716000  |
| 1 | -3.945272000 | 2.380505000  | 0.857213000  |
| 1 | -2.964905000 | 0.978278000  | 1.255184000  |
| 6 | -3.886551000 | 1.927742000  | 2.964192000  |
| 1 | -4.747431000 | 1.251429000  | 2.968992000  |
| 1 | -3.180171000 | 1.571262000  | 3.722447000  |
| 1 | -4.238370000 | 2.916435000  | 3.280218000  |
| 6 | -1.954353000 | 3.605999000  | -0.737979000 |
| 1 | -2.863830000 | 3.064233000  | -1.053225000 |
| 1 | -2.293659000 | 4.578405000  | -0.352945000 |
| 6 | -1.070403000 | 3.824568000  | -1.962045000 |
| 1 | -0.682493000 | 2.854005000  | -2.294015000 |
| 1 | -0.202682000 | 4.426648000  | -1.668751000 |
| 6 | -1.818975000 | 4.503942000  | -3.105352000 |
| 1 | -1.164518000 | 4.663413000  | -3.967745000 |
| 1 | -2.666948000 | 3.896425000  | -3.441350000 |
| 1 | -2.211515000 | 5.481242000  | -2.800559000 |
| 1 | -0.987879000 | 1.989274000  | 0.002481000  |

---

A17

| -----                   |              |              |              |
|-------------------------|--------------|--------------|--------------|
| Coordinates (Angstroms) |              |              |              |
|                         | X            | Y            | Z            |
| -----                   |              |              |              |
| 44                      | 0.052926000  | -1.057457000 | -0.737176000 |
| 6                       | -2.752882000 | -1.389342000 | 0.267407000  |
| 6                       | -4.100310000 | -1.747630000 | 0.331230000  |
| 6                       | -4.710012000 | -2.333016000 | -0.767619000 |
| 6                       | -3.957526000 | -2.550977000 | -1.916034000 |
| 6                       | -2.623505000 | -2.174999000 | -1.913618000 |
| 7                       | -2.029445000 | -1.606800000 | -0.855972000 |
| 1                       | -5.757239000 | -2.613815000 | -0.726414000 |
| 1                       | -4.668647000 | -1.569544000 | 1.235564000  |
| 1                       | -4.387974000 | -3.005351000 | -2.800814000 |
| 1                       | -1.991654000 | -2.329461000 | -2.780346000 |
| 6                       | -2.042153000 | -0.717129000 | 1.386261000  |
| 6                       | -2.641459000 | -0.402757000 | 2.595052000  |
| 6                       | -1.862879000 | 0.290186000  | 3.544194000  |
| 6                       | -0.570464000 | 0.646708000  | 3.264132000  |
| 6                       | 0.024986000  | 0.296650000  | 2.006353000  |
| 7                       | -0.765962000 | -0.390821000 | 1.110113000  |
| 1                       | -2.297150000 | 0.543141000  | 4.507285000  |
| 1                       | -3.663883000 | -0.676971000 | 2.817464000  |
| 1                       | 0.031295000  | 1.178406000  | 3.993934000  |
| 6                       | 1.332191000  | 0.627175000  | 1.628926000  |
| 15                      | 2.027461000  | -0.358636000 | 0.302996000  |
| 6                       | 0.780815000  | -1.702921000 | -2.314567000 |
| 8                       | 1.234724000  | -2.122754000 | -3.302188000 |
| 6                       | 2.980470000  | -1.779302000 | 1.168182000  |
| 6                       | 2.052906000  | -2.328259000 | 2.266789000  |
| 6                       | 3.275006000  | -2.913081000 | 0.174507000  |
| 6                       | 4.281651000  | -1.340809000 | 1.853153000  |
| 1                       | 1.925695000  | -1.609407000 | 3.081202000  |
| 1                       | 1.066054000  | -2.581788000 | 1.871504000  |
| 1                       | 2.496976000  | -3.239396000 | 2.687005000  |
| 1                       | 3.943051000  | -2.606062000 | -0.633656000 |
| 1                       | 3.762421000  | -3.742591000 | 0.703120000  |
| 1                       | 2.350914000  | -3.289636000 | -0.270583000 |
| 1                       | 4.667226000  | -2.173256000 | 2.455220000  |
| 1                       | 5.066756000  | -1.072790000 | 1.141633000  |
| 1                       | 4.120031000  | -0.497383000 | 2.532856000  |
| 6                       | 3.286272000  | 0.744650000  | -0.594716000 |
| 6                       | 4.179671000  | -0.092118000 | -1.520322000 |
| 6                       | 2.490559000  | 1.725005000  | -1.463621000 |
| 6                       | 4.147143000  | 1.593406000  | 0.354757000  |
| 1                       | 4.880360000  | -0.722558000 | -0.967976000 |

|   |              |              |              |
|---|--------------|--------------|--------------|
| 1 | 3.586391000  | -0.731812000 | -2.181314000 |
| 1 | 4.776483000  | 0.576349000  | -2.153355000 |
| 1 | 1.891618000  | 2.381040000  | -0.828258000 |
| 1 | 3.183062000  | 2.358346000  | -2.032312000 |
| 1 | 1.822656000  | 1.212608000  | -2.158766000 |
| 1 | 4.776834000  | 2.267851000  | -0.239615000 |
| 1 | 3.521721000  | 2.214417000  | 1.004119000  |
| 1 | 4.811613000  | 1.002643000  | 0.984733000  |
| 1 | -0.023173000 | 2.346399000  | 0.555729000  |
| 1 | 1.977084000  | 1.060785000  | 2.390287000  |
| 1 | 0.267989000  | -2.540396000 | -0.051108000 |
| 1 | -0.321570000 | 0.479925000  | -1.505633000 |
| 7 | -0.766262000 | 2.464112000  | -0.152682000 |
| 6 | -2.103353000 | 2.554901000  | 0.490414000  |
| 1 | -2.074853000 | 1.946676000  | 1.394539000  |
| 1 | -2.269689000 | 3.594276000  | 0.791670000  |
| 6 | -3.200146000 | 2.060481000  | -0.446284000 |
| 1 | -3.290915000 | 2.728172000  | -1.310740000 |
| 1 | -2.910888000 | 1.078689000  | -0.835892000 |
| 6 | -4.541319000 | 1.958073000  | 0.272342000  |
| 1 | -5.315112000 | 1.590036000  | -0.406685000 |
| 1 | -4.474272000 | 1.264254000  | 1.116534000  |
| 1 | -4.867993000 | 2.929627000  | 0.659081000  |
| 6 | -0.442517000 | 3.586269000  | -1.070905000 |
| 1 | 0.198672000  | 3.186233000  | -1.859281000 |
| 1 | -1.373659000 | 3.910031000  | -1.541969000 |
| 6 | 0.234277000  | 4.739081000  | -0.342861000 |
| 1 | 1.137606000  | 4.364778000  | 0.155168000  |
| 1 | -0.429405000 | 5.117715000  | 0.443652000  |
| 6 | 0.604212000  | 5.865917000  | -1.302382000 |
| 1 | 1.084753000  | 6.690356000  | -0.768993000 |
| 1 | 1.300517000  | 5.514130000  | -2.070577000 |
| 1 | -0.281374000 | 6.265698000  | -1.807480000 |
| 1 | -0.664918000 | 1.526922000  | -0.697048000 |

## A18

Coordinates (Angstroms)

|    | X            | Y            | Z            |
|----|--------------|--------------|--------------|
| 44 | 0.188112000  | -1.267958000 | -0.574910000 |
| 6  | -2.607405000 | -1.653208000 | 0.444255000  |
| 6  | -3.927750000 | -2.090351000 | 0.551336000  |
| 6  | -4.450204000 | -2.944288000 | -0.408145000 |
| 6  | -3.642281000 | -3.348249000 | -1.464649000 |

|    |              |              |              |
|----|--------------|--------------|--------------|
| 6  | -2.340496000 | -2.876167000 | -1.515018000 |
| 7  | -1.832456000 | -2.049891000 | -0.591771000 |
| 1  | -5.475986000 | -3.288894000 | -0.330560000 |
| 1  | -4.544575000 | -1.762086000 | 1.378168000  |
| 1  | -4.005259000 | -4.016273000 | -2.236738000 |
| 1  | -1.667445000 | -3.160642000 | -2.315407000 |
| 6  | -1.981607000 | -0.718206000 | 1.415827000  |
| 6  | -2.634852000 | -0.228969000 | 2.529150000  |
| 6  | -1.933101000 | 0.690193000  | 3.342872000  |
| 6  | -0.663326000 | 1.077893000  | 3.024534000  |
| 6  | -0.001027000 | 0.535661000  | 1.867901000  |
| 7  | -0.720271000 | -0.357936000 | 1.102608000  |
| 1  | -2.415062000 | 1.095302000  | 4.227924000  |
| 1  | -3.644249000 | -0.526224000 | 2.779504000  |
| 1  | -0.122025000 | 1.782262000  | 3.647125000  |
| 6  | 1.296682000  | 0.864291000  | 1.490761000  |
| 15 | 2.081230000  | -0.177381000 | 0.283108000  |
| 6  | 1.059630000  | -2.181570000 | -1.952470000 |
| 8  | 1.613757000  | -2.777771000 | -2.779266000 |
| 6  | 3.257296000  | -1.315456000 | 1.262260000  |
| 6  | 2.464463000  | -1.855322000 | 2.465394000  |
| 6  | 3.705619000  | -2.511278000 | 0.409879000  |
| 6  | 4.480368000  | -0.573824000 | 1.820440000  |
| 1  | 2.201634000  | -1.058359000 | 3.165731000  |
| 1  | 1.541855000  | -2.354532000 | 2.158545000  |
| 1  | 3.083795000  | -2.586893000 | 2.998705000  |
| 1  | 4.265034000  | -2.217621000 | -0.480757000 |
| 1  | 4.358595000  | -3.158640000 | 1.008550000  |
| 1  | 2.846415000  | -3.107407000 | 0.091356000  |
| 1  | 5.033057000  | -1.243685000 | 2.490580000  |
| 1  | 5.177583000  | -0.253454000 | 1.042818000  |
| 1  | 4.187441000  | 0.302920000  | 2.407706000  |
| 6  | 3.090819000  | 0.944517000  | -0.863520000 |
| 6  | 4.151667000  | 0.162003000  | -1.649454000 |
| 6  | 2.109729000  | 1.547118000  | -1.880588000 |
| 6  | 3.741728000  | 2.108332000  | -0.099714000 |
| 1  | 4.974076000  | -0.189608000 | -1.022321000 |
| 1  | 3.717486000  | -0.700455000 | -2.165168000 |
| 1  | 4.584673000  | 0.817651000  | -2.414704000 |
| 1  | 1.239868000  | 1.990736000  | -1.392173000 |
| 1  | 2.619186000  | 2.332743000  | -2.452205000 |
| 1  | 1.751640000  | 0.795123000  | -2.588620000 |
| 1  | 4.297053000  | 2.737141000  | -0.806317000 |
| 1  | 2.982747000  | 2.735663000  | 0.377057000  |

|   |              |              |              |
|---|--------------|--------------|--------------|
| 1 | 4.445461000  | 1.780815000  | 0.667358000  |
| 1 | -0.330557000 | 2.465936000  | 0.143929000  |
| 1 | 1.877120000  | 1.516051000  | 2.136505000  |
| 1 | 0.578158000  | -2.479260000 | 0.346069000  |
| 1 | -0.468413000 | -0.057326000 | -1.962100000 |
| 7 | -1.041007000 | 2.640132000  | -0.562080000 |
| 6 | -2.377272000 | 2.481403000  | 0.006660000  |
| 1 | -2.295667000 | 1.975690000  | 0.972220000  |
| 1 | -2.851593000 | 3.455981000  | 0.212206000  |
| 6 | -3.292365000 | 1.659636000  | -0.900938000 |
| 1 | -3.376922000 | 2.151743000  | -1.878310000 |
| 1 | -2.813461000 | 0.690987000  | -1.082455000 |
| 6 | -4.676272000 | 1.451543000  | -0.293910000 |
| 1 | -5.305326000 | 0.822912000  | -0.932016000 |
| 1 | -4.596826000 | 0.965052000  | 0.685187000  |
| 1 | -5.196176000 | 2.405229000  | -0.147068000 |
| 6 | -0.795596000 | 3.917770000  | -1.216547000 |
| 1 | 0.033557000  | 3.804675000  | -1.928616000 |
| 1 | -1.679243000 | 4.167821000  | -1.818363000 |
| 6 | -0.472364000 | 5.072241000  | -0.262676000 |
| 1 | 0.437666000  | 4.813257000  | 0.295173000  |
| 1 | -1.274223000 | 5.168092000  | 0.480257000  |
| 6 | -0.275992000 | 6.401355000  | -0.986384000 |
| 1 | -0.008133000 | 7.201026000  | -0.289179000 |
| 1 | 0.521630000  | 6.331888000  | -1.734681000 |
| 1 | -1.190678000 | 6.706638000  | -1.506986000 |
| 1 | -0.459740000 | 0.492492000  | -1.409218000 |

**B8**

-----  
Coordinates (Angstroms)

|   | X            | Y            | Z            |
|---|--------------|--------------|--------------|
| 7 | 2.711517000  | 0.135260000  | -0.506286000 |
| 6 | 3.554505000  | 1.269126000  | -0.122072000 |
| 1 | 3.377069000  | 2.099572000  | -0.815164000 |
| 1 | 4.620171000  | 1.008119000  | -0.222462000 |
| 6 | 3.412007000  | -1.140722000 | -0.587608000 |
| 1 | 4.303231000  | -1.078152000 | -1.239956000 |
| 1 | 3.781400000  | -1.407396000 | 0.410871000  |
| 6 | -1.871793000 | -0.042658000 | -2.355618000 |
| 1 | -2.149919000 | -0.710656000 | -3.184328000 |
| 1 | -1.955497000 | 0.979280000  | -2.733998000 |
| 6 | -0.410445000 | -0.338031000 | -2.090734000 |
| 8 | 0.488215000  | 0.230271000  | -2.676730000 |

|   |              |              |              |
|---|--------------|--------------|--------------|
| 1 | -0.204385000 | -1.174893000 | -1.401156000 |
| 7 | -0.194100000 | 0.665654000  | 0.543241000  |
| 1 | 0.800829000  | 0.499267000  | 0.366083000  |
| 6 | -0.443569000 | 2.088084000  | 0.688460000  |
| 1 | -1.520321000 | 2.230645000  | 0.854028000  |
| 1 | 0.056376000  | 2.510982000  | 1.583103000  |
| 6 | -0.609320000 | -0.083367000 | 1.717834000  |
| 1 | -1.702428000 | -0.014388000 | 1.802387000  |
| 1 | -0.194114000 | 0.349188000  | 2.650216000  |
| 1 | 2.256750000  | 0.310941000  | -1.398529000 |
| 6 | -0.203590000 | -1.549196000 | 1.638229000  |
| 1 | 0.889332000  | -1.617556000 | 1.561846000  |
| 1 | -0.613818000 | -1.978849000 | 0.717632000  |
| 6 | -0.690511000 | -2.350498000 | 2.840536000  |
| 1 | -0.392720000 | -3.400962000 | 2.767982000  |
| 1 | -0.281054000 | -1.951804000 | 3.775351000  |
| 1 | -1.783137000 | -2.316276000 | 2.915059000  |
| 6 | -0.014735000 | 2.877971000  | -0.542060000 |
| 1 | 1.048027000  | 2.690297000  | -0.739589000 |
| 1 | -0.554796000 | 2.501366000  | -1.416778000 |
| 6 | -0.251505000 | 4.376026000  | -0.379738000 |
| 1 | 0.310837000  | 4.777183000  | 0.470738000  |
| 1 | 0.056845000  | 4.927398000  | -1.273044000 |
| 1 | -1.311782000 | 4.591828000  | -0.204748000 |
| 6 | 3.287941000  | 1.757896000  | 1.304364000  |
| 1 | 3.983240000  | 2.577903000  | 1.524243000  |
| 1 | 2.278590000  | 2.183716000  | 1.351490000  |
| 6 | 3.420147000  | 0.669381000  | 2.363968000  |
| 1 | 4.423539000  | 0.228284000  | 2.363338000  |
| 1 | 3.233290000  | 1.069660000  | 3.365282000  |
| 1 | 2.697058000  | -0.133222000 | 2.185917000  |
| 6 | 2.495697000  | -2.245223000 | -1.101757000 |
| 1 | 2.080729000  | -1.936508000 | -2.069217000 |
| 1 | 1.648845000  | -2.348949000 | -0.414745000 |
| 6 | 3.213642000  | -3.583053000 | -1.249719000 |
| 1 | 2.527931000  | -4.362529000 | -1.595037000 |
| 1 | 4.032323000  | -3.517780000 | -1.974558000 |
| 1 | 3.638870000  | -3.914086000 | -0.295822000 |
| 6 | -2.785170000 | -0.286411000 | -1.182330000 |
| 6 | -2.985781000 | -1.577617000 | -0.689450000 |
| 6 | -3.443651000 | 0.775601000  | -0.560961000 |
| 6 | -3.811769000 | -1.800808000 | 0.408761000  |
| 1 | -2.492535000 | -2.419375000 | -1.169610000 |
| 6 | -4.278333000 | 0.556386000  | 0.530791000  |



|   |              |              |              |
|---|--------------|--------------|--------------|
| 1 | -3.298275000 | 1.784737000  | -0.937315000 |
| 6 | -4.462451000 | -0.733491000 | 1.022393000  |
| 1 | -3.952067000 | -2.810969000 | 0.781285000  |
| 1 | -4.782426000 | 1.395925000  | 0.999694000  |
| 1 | -5.111547000 | -0.906876000 | 1.874918000  |

**B9**

Coordinates (Angstroms)

|   | X            | Y            | Z            |
|---|--------------|--------------|--------------|
| 7 | 2.852997000  | -0.065377000 | -0.503268000 |
| 6 | 3.775863000  | 0.912885000  | 0.087091000  |
| 1 | 3.847211000  | 1.790469000  | -0.568195000 |
| 1 | 4.781345000  | 0.475716000  | 0.132847000  |
| 6 | 3.378611000  | -1.421444000 | -0.621142000 |
| 1 | 4.314810000  | -1.374066000 | -1.191530000 |
| 1 | 3.633751000  | -1.862181000 | 0.359487000  |
| 6 | -1.758139000 | 0.480375000  | -1.777075000 |
| 1 | -1.791963000 | 0.025618000  | -2.772461000 |
| 1 | -1.814063000 | 1.563273000  | -1.923670000 |
| 6 | -0.384136000 | 0.111820000  | -1.184448000 |
| 8 | 0.563610000  | 0.481051000  | -2.149800000 |
| 1 | -0.369025000 | -0.977094000 | -1.043320000 |
| 7 | -0.050990000 | 0.679155000  | 0.127415000  |
| 1 | 1.991667000  | -0.062347000 | 0.045039000  |
| 6 | -0.255602000 | 2.121441000  | 0.273079000  |
| 1 | -1.325196000 | 2.388288000  | 0.204428000  |
| 1 | 0.043796000  | 2.373527000  | 1.298582000  |
| 6 | -0.580989000 | -0.024084000 | 1.303291000  |
| 1 | -1.669863000 | 0.104945000  | 1.410470000  |
| 1 | -0.127760000 | 0.465467000  | 2.175185000  |
| 1 | 1.453413000  | 0.362680000  | -1.755117000 |
| 6 | -0.250230000 | -1.511200000 | 1.400105000  |
| 1 | 0.827450000  | -1.657714000 | 1.257402000  |
| 1 | -0.756587000 | -2.076797000 | 0.611725000  |
| 6 | -0.677730000 | -2.074855000 | 2.752966000  |
| 1 | -0.463217000 | -3.145207000 | 2.821702000  |
| 1 | -0.156064000 | -1.575912000 | 3.577269000  |
| 1 | -1.753676000 | -1.939856000 | 2.907568000  |
| 6 | 0.546881000  | 3.009532000  | -0.675730000 |
| 1 | 1.603001000  | 2.723076000  | -0.623964000 |
| 1 | 0.241140000  | 2.840438000  | -1.710129000 |
| 6 | 0.385201000  | 4.482329000  | -0.309228000 |
| 1 | 0.731209000  | 4.680448000  | 0.711769000  |

|   |              |              |              |
|---|--------------|--------------|--------------|
| 1 | 0.960451000  | 5.122537000  | -0.984435000 |
| 1 | -0.663567000 | 4.794935000  | -0.369094000 |
| 6 | 3.363313000  | 1.373063000  | 1.487902000  |
| 1 | 4.068097000  | 2.143480000  | 1.821906000  |
| 1 | 2.381272000  | 1.857730000  | 1.422231000  |
| 6 | 3.302936000  | 0.246119000  | 2.515966000  |
| 1 | 4.278481000  | -0.238498000 | 2.633388000  |
| 1 | 2.996442000  | 0.623602000  | 3.496288000  |
| 1 | 2.581833000  | -0.524404000 | 2.223267000  |
| 6 | 2.402858000  | -2.338723000 | -1.352081000 |
| 1 | 2.181689000  | -1.905894000 | -2.333661000 |
| 1 | 1.452240000  | -2.366665000 | -0.805827000 |
| 6 | 2.941188000  | -3.758018000 | -1.503524000 |
| 1 | 2.237450000  | -4.391563000 | -2.051283000 |
| 1 | 3.889841000  | -3.766739000 | -2.051369000 |
| 1 | 3.116955000  | -4.223483000 | -0.527455000 |
| 6 | -2.917856000 | -0.003367000 | -0.942552000 |
| 6 | -3.141110000 | -1.373610000 | -0.770384000 |
| 6 | -3.764036000 | 0.891811000  | -0.284869000 |
| 6 | -4.151728000 | -1.834882000 | 0.066456000  |
| 1 | -2.509238000 | -2.086679000 | -1.294428000 |
| 6 | -4.782316000 | 0.436172000  | 0.548337000  |
| 1 | -3.614746000 | 1.959939000  | -0.419181000 |
| 6 | -4.972240000 | -0.929676000 | 0.735983000  |
| 1 | -4.301916000 | -2.902550000 | 0.194947000  |
| 1 | -5.424792000 | 1.149728000  | 1.055468000  |
| 1 | -5.759226000 | -1.287221000 | 1.392657000  |

C7

-----  
Coordinates (Angstroms)

|    | X            | Y           | Z            |
|----|--------------|-------------|--------------|
| 44 | 0.480734000  | 0.970533000 | -0.951296000 |
| 6  | -0.494187000 | 3.139504000 | 0.854398000  |
| 6  | -1.214471000 | 4.230901000 | 1.339096000  |
| 6  | -2.127268000 | 4.874265000 | 0.515705000  |
| 6  | -2.304931000 | 4.413572000 | -0.782642000 |
| 6  | -1.554254000 | 3.325784000 | -1.202222000 |
| 7  | -0.674617000 | 2.704411000 | -0.411651000 |
| 1  | -2.691707000 | 5.723740000 | 0.885935000  |
| 1  | -1.065444000 | 4.576366000 | 2.354260000  |
| 1  | -3.007831000 | 4.879898000 | -1.462992000 |
| 1  | -1.654783000 | 2.924818000 | -2.204026000 |
| 6  | 0.486786000  | 2.385660000 | 1.683356000  |

|    |              |              |              |
|----|--------------|--------------|--------------|
| 6  | 0.750195000  | 2.687148000  | 3.007416000  |
| 6  | 1.683154000  | 1.874084000  | 3.685056000  |
| 6  | 2.277760000  | 0.814717000  | 3.056340000  |
| 6  | 1.962487000  | 0.512844000  | 1.686979000  |
| 7  | 1.076617000  | 1.354774000  | 1.050629000  |
| 1  | 1.928176000  | 2.093963000  | 4.720596000  |
| 1  | 0.276046000  | 3.517174000  | 3.513679000  |
| 1  | 2.995606000  | 0.188269000  | 3.575858000  |
| 6  | 2.486047000  | -0.574511000 | 0.982555000  |
| 15 | 2.313896000  | -0.512026000 | -0.791144000 |
| 6  | 0.027238000  | 0.721747000  | -2.729588000 |
| 8  | -0.226001000 | 0.632805000  | -3.863464000 |
| 6  | 2.189907000  | -2.296467000 | -1.457083000 |
| 6  | 1.306259000  | -3.079719000 | -0.483050000 |
| 6  | 1.486682000  | -2.261528000 | -2.823468000 |
| 6  | 3.505512000  | -3.071174000 | -1.598266000 |
| 1  | 1.798191000  | -3.236633000 | 0.480658000  |
| 1  | 0.369671000  | -2.553395000 | -0.314465000 |
| 1  | 1.060073000  | -4.059179000 | -0.912099000 |
| 1  | 2.012066000  | -1.633055000 | -3.547506000 |
| 1  | 1.437180000  | -3.275961000 | -3.238586000 |
| 1  | 0.465477000  | -1.882906000 | -2.735770000 |
| 1  | 3.272392000  | -4.117699000 | -1.832234000 |
| 1  | 4.125133000  | -2.694266000 | -2.414713000 |
| 1  | 4.093124000  | -3.066421000 | -0.675930000 |
| 6  | 3.962218000  | 0.252580000  | -1.412837000 |
| 6  | 3.942231000  | 0.381864000  | -2.940154000 |
| 6  | 4.102018000  | 1.654503000  | -0.788860000 |
| 6  | 5.214648000  | -0.518656000 | -0.955298000 |
| 1  | 3.960824000  | -0.592828000 | -3.438008000 |
| 1  | 3.055509000  | 0.926644000  | -3.281080000 |
| 1  | 4.827097000  | 0.934735000  | -3.279971000 |
| 1  | 4.127031000  | 1.602060000  | 0.304091000  |
| 1  | 5.049018000  | 2.093460000  | -1.125544000 |
| 1  | 3.297253000  | 2.330196000  | -1.077962000 |
| 1  | 6.097120000  | 0.112106000  | -1.116593000 |
| 1  | 5.175123000  | -0.747670000 | 0.114936000  |
| 1  | 5.386412000  | -1.442962000 | -1.502762000 |
| 6  | -1.940451000 | -0.956999000 | 0.557195000  |
| 8  | -1.461319000 | 0.167579000  | 0.135096000  |
| 1  | 1.562440000  | 1.945779000  | -1.522839000 |
| 1  | 3.256189000  | -1.172654000 | 1.462711000  |
| 1  | -2.861903000 | -0.877432000 | 1.170928000  |
| 7  | -0.880205000 | -1.506196000 | 1.732976000  |

|   |              |              |              |
|---|--------------|--------------|--------------|
| 1 | 0.028857000  | -1.307979000 | 1.290522000  |
| 6 | -0.890819000 | -2.930834000 | 2.137227000  |
| 1 | -0.781848000 | -3.527012000 | 1.230558000  |
| 1 | -1.870922000 | -3.158650000 | 2.565804000  |
| 6 | 0.243552000  | -3.281932000 | 3.097924000  |
| 1 | 0.065857000  | -2.833275000 | 4.080894000  |
| 1 | 1.173360000  | -2.844242000 | 2.714112000  |
| 6 | 0.396190000  | -4.793455000 | 3.239301000  |
| 1 | 0.631446000  | -5.257614000 | 2.275460000  |
| 1 | 1.201543000  | -5.041779000 | 3.935889000  |
| 1 | -0.523427000 | -5.253649000 | 3.616678000  |
| 6 | -0.972050000 | -0.548019000 | 2.873893000  |
| 1 | -1.079256000 | 0.427919000  | 2.399237000  |
| 1 | -0.017037000 | -0.554866000 | 3.403755000  |
| 6 | -2.115545000 | -0.800231000 | 3.847449000  |
| 1 | -3.068850000 | -0.872119000 | 3.313087000  |
| 1 | -1.973531000 | -1.749078000 | 4.377012000  |
| 6 | -2.177238000 | -2.046493000 | -0.505544000 |
| 1 | -1.308140000 | -2.072220000 | -1.168285000 |
| 1 | -2.318385000 | -3.037606000 | -0.064762000 |
| 6 | -3.410151000 | -1.685034000 | -1.299279000 |
| 6 | -3.370265000 | -0.642639000 | -2.229948000 |
| 6 | -4.620998000 | -2.347281000 | -1.087056000 |
| 6 | -4.509906000 | -0.282023000 | -2.940031000 |
| 1 | -2.434351000 | -0.118669000 | -2.386686000 |
| 6 | -5.766065000 | -1.986699000 | -1.794949000 |
| 1 | -4.668055000 | -3.156245000 | -0.361630000 |
| 6 | -5.713084000 | -0.952084000 | -2.724006000 |
| 1 | -4.458794000 | 0.522962000  | -3.667465000 |
| 1 | -6.698989000 | -2.514757000 | -1.620243000 |
| 1 | -6.602847000 | -0.671700000 | -3.279981000 |
| 6 | -2.184199000 | 0.340296000  | 4.861701000  |
| 1 | -2.373444000 | 1.296640000  | 4.363540000  |
| 1 | -2.983299000 | 0.173160000  | 5.589193000  |
| 1 | -1.242123000 | 0.435442000  | 5.412317000  |

**D7**

| -----                   |              |              |              |
|-------------------------|--------------|--------------|--------------|
| Coordinates (Angstroms) |              |              |              |
|                         | X            | Y            | Z            |
| -----                   |              |              |              |
| 44                      | -1.584816000 | -0.162951000 | -0.812792000 |
| 6                       | -2.320838000 | -2.850173000 | 0.304491000  |
| 6                       | -2.518949000 | -4.227325000 | 0.418372000  |
| 6                       | -2.352403000 | -5.041789000 | -0.690943000 |

|    |              |              |              |
|----|--------------|--------------|--------------|
| 6  | -2.010962000 | -4.461325000 | -1.907211000 |
| 6  | -1.814925000 | -3.090677000 | -1.947960000 |
| 7  | -1.931981000 | -2.302929000 | -0.871039000 |
| 1  | -2.505556000 | -6.112716000 | -0.608712000 |
| 1  | -2.813004000 | -4.658060000 | 1.366908000  |
| 1  | -1.897496000 | -5.049609000 | -2.810162000 |
| 1  | -1.555303000 | -2.589045000 | -2.872510000 |
| 6  | -2.561494000 | -1.901801000 | 1.423062000  |
| 6  | -2.994673000 | -2.300677000 | 2.670534000  |
| 6  | -3.253216000 | -1.285042000 | 3.621751000  |
| 6  | -3.122918000 | 0.031275000  | 3.289619000  |
| 6  | -2.690750000 | 0.417459000  | 1.969465000  |
| 7  | -2.353850000 | -0.607456000 | 1.104835000  |
| 1  | -3.574547000 | -1.560547000 | 4.622371000  |
| 1  | -3.149986000 | -3.341270000 | 2.921635000  |
| 1  | -3.341799000 | 0.811831000  | 4.010621000  |
| 6  | -2.580076000 | 1.730297000  | 1.546192000  |
| 15 | -1.859058000 | 2.048230000  | -0.041963000 |
| 6  | -1.095246000 | 0.263627000  | -2.551722000 |
| 8  | -0.838471000 | 0.535790000  | -3.655613000 |
| 6  | -0.275810000 | 3.063658000  | 0.304706000  |
| 6  | 0.375863000  | 2.445596000  | 1.551388000  |
| 6  | 0.683825000  | 2.941620000  | -0.887969000 |
| 6  | -0.487966000 | 4.549861000  | 0.624760000  |
| 1  | -0.177062000 | 2.704960000  | 2.457577000  |
| 1  | 0.402933000  | 1.354944000  | 1.525656000  |
| 1  | 1.401662000  | 2.812808000  | 1.665838000  |
| 1  | 0.259913000  | 3.350353000  | -1.809215000 |
| 1  | 1.611873000  | 3.489075000  | -0.679944000 |
| 1  | 0.941041000  | 1.898929000  | -1.088970000 |
| 1  | 0.468418000  | 4.981936000  | 0.945789000  |
| 1  | -0.829040000 | 5.128969000  | -0.236332000 |
| 1  | -1.196399000 | 4.690728000  | 1.446398000  |
| 6  | -3.084644000 | 3.147216000  | -0.999190000 |
| 6  | -2.437375000 | 3.738594000  | -2.258369000 |
| 6  | -4.274130000 | 2.276035000  | -1.437645000 |
| 6  | -3.665803000 | 4.265488000  | -0.116955000 |
| 1  | -1.672530000 | 4.485136000  | -2.029796000 |
| 1  | -1.985252000 | 2.961163000  | -2.882144000 |
| 1  | -3.205732000 | 4.237779000  | -2.861688000 |
| 1  | -4.693791000 | 1.714781000  | -0.597128000 |
| 1  | -5.059576000 | 2.928443000  | -1.839282000 |
| 1  | -3.992596000 | 1.564713000  | -2.216036000 |
| 1  | -4.424568000 | 4.813528000  | -0.689035000 |

|   |              |              |              |
|---|--------------|--------------|--------------|
| 1 | -4.158090000 | 3.849303000  | 0.767112000  |
| 1 | -2.925064000 | 4.993131000  | 0.211633000  |
| 6 | 3.624604000  | 0.932152000  | 1.595092000  |
| 8 | 3.418371000  | 1.531536000  | 2.624462000  |
| 1 | -2.815153000 | 2.531125000  | 2.239842000  |
| 1 | 3.221395000  | 1.307259000  | 0.628528000  |
| 6 | 4.450522000  | -0.328631000 | 1.494143000  |
| 1 | 4.711091000  | -0.661305000 | 2.502358000  |
| 1 | 3.832010000  | -1.092989000 | 1.011234000  |
| 6 | 5.678155000  | -0.063259000 | 0.646754000  |
| 6 | 6.649784000  | 0.834211000  | 1.100291000  |
| 6 | 5.846240000  | -0.668935000 | -0.599302000 |
| 6 | 7.770051000  | 1.114600000  | 0.325672000  |
| 1 | 6.524136000  | 1.315515000  | 2.066743000  |
| 6 | 6.968078000  | -0.389482000 | -1.376496000 |
| 1 | 5.098332000  | -1.370663000 | -0.960510000 |
| 6 | 7.931743000  | 0.502797000  | -0.915932000 |
| 1 | 8.516697000  | 1.813328000  | 0.690226000  |
| 1 | 7.088306000  | -0.870914000 | -2.342186000 |
| 1 | 8.806248000  | 0.721842000  | -1.520691000 |
| 1 | -3.079690000 | -0.008687000 | -1.249499000 |
| 7 | 0.772931000  | -0.728424000 | -0.123048000 |
| 1 | 1.013190000  | 0.141451000  | 0.341158000  |
| 6 | 1.708150000  | -0.860655000 | -1.253097000 |
| 1 | 1.634672000  | 0.047495000  | -1.859443000 |
| 6 | 0.931611000  | -1.808749000 | 0.868489000  |
| 1 | 0.240147000  | -2.620512000 | 0.622758000  |
| 1 | 2.745342000  | -0.916679000 | -0.881940000 |
| 1 | 1.945906000  | -2.238340000 | 0.807809000  |
| 6 | 1.449051000  | -2.068055000 | -2.143290000 |
| 1 | 1.415887000  | -2.984058000 | -1.541240000 |
| 1 | 0.467200000  | -1.956160000 | -2.606927000 |
| 6 | 2.515120000  | -2.203935000 | -3.226882000 |
| 1 | 3.509853000  | -2.359361000 | -2.793604000 |
| 1 | 2.303138000  | -3.053744000 | -3.882233000 |
| 1 | 2.559827000  | -1.305053000 | -3.851414000 |
| 6 | 0.687702000  | -1.334528000 | 2.296168000  |
| 1 | 1.454529000  | -0.599152000 | 2.571691000  |
| 1 | -0.275511000 | -0.820888000 | 2.348370000  |
| 6 | 0.705806000  | -2.491776000 | 3.289422000  |
| 1 | -0.075846000 | -3.220281000 | 3.050018000  |
| 1 | 1.669896000  | -3.013371000 | 3.283750000  |
| 1 | 0.524080000  | -2.133686000 | 4.306422000  |

---

**D8**

| -----                   |              |              |              |
|-------------------------|--------------|--------------|--------------|
| Coordinates (Angstroms) |              |              |              |
|                         | X            | Y            | Z            |
| -----                   |              |              |              |
| 44                      | -1.546750000 | 0.219673000  | 0.694714000  |
| 6                       | -1.853984000 | 3.069901000  | -0.201977000 |
| 6                       | -1.992536000 | 4.457534000  | -0.185735000 |
| 6                       | -1.989110000 | 5.129966000  | 1.026855000  |
| 6                       | -1.860654000 | 4.396755000  | 2.199540000  |
| 6                       | -1.725402000 | 3.019747000  | 2.108821000  |
| 7                       | -1.706331000 | 2.365269000  | 0.942628000  |
| 1                       | -2.094870000 | 6.209209000  | 1.054232000  |
| 1                       | -2.101338000 | 5.010761000  | -1.110058000 |
| 1                       | -1.865747000 | 4.873843000  | 3.172342000  |
| 1                       | -1.629817000 | 2.408155000  | 2.997162000  |
| 6                       | -1.881701000 | 2.277626000  | -1.456597000 |
| 6                       | -2.056278000 | 2.834599000  | -2.720960000 |
| 6                       | -2.107836000 | 1.992557000  | -3.823131000 |
| 6                       | -1.979435000 | 0.622100000  | -3.643799000 |
| 6                       | -1.785983000 | 0.120635000  | -2.360090000 |
| 7                       | -1.746611000 | 0.947505000  | -1.300504000 |
| 1                       | -2.247547000 | 2.405904000  | -4.816262000 |
| 1                       | -2.159748000 | 3.903752000  | -2.852245000 |
| 1                       | -2.009363000 | -0.059253000 | -4.486579000 |
| 6                       | -1.526114000 | -1.338841000 | -2.108037000 |
| 15                      | -1.834552000 | -1.834913000 | -0.338649000 |
| 6                       | -1.551023000 | -0.417614000 | 2.431733000  |
| 8                       | -1.611961000 | -0.818872000 | 3.521334000  |
| 6                       | -0.622151000 | -3.269587000 | -0.114229000 |
| 6                       | 0.781962000  | -2.647725000 | -0.226773000 |
| 6                       | -0.812940000 | -3.843404000 | 1.296604000  |
| 6                       | -0.704847000 | -4.404022000 | -1.149515000 |
| 1                       | 1.095658000  | -2.577860000 | -1.275533000 |
| 1                       | 0.832458000  | -1.632353000 | 0.186193000  |
| 1                       | 1.505556000  | -3.293493000 | 0.282492000  |
| 1                       | -1.779624000 | -4.344255000 | 1.409500000  |
| 1                       | -0.033187000 | -4.588048000 | 1.493326000  |
| 1                       | -0.731785000 | -3.069815000 | 2.065767000  |
| 1                       | 0.210133000  | -5.002704000 | -1.068531000 |
| 1                       | -1.545857000 | -5.078314000 | -0.991894000 |
| 1                       | -0.749822000 | -4.026825000 | -2.176929000 |
| 6                       | -3.630072000 | -2.456707000 | -0.347457000 |
| 6                       | -4.152119000 | -2.510439000 | 1.097823000  |
| 6                       | -4.478729000 | -1.445109000 | -1.138431000 |

|   |              |              |              |
|---|--------------|--------------|--------------|
| 6 | -3.819117000 | -3.834857000 | -0.993635000 |
| 1 | -3.561289000 | -3.178130000 | 1.731271000  |
| 1 | -4.151376000 | -1.519688000 | 1.557009000  |
| 1 | -5.182039000 | -2.887483000 | 1.092087000  |
| 1 | -4.269394000 | -1.480995000 | -2.212627000 |
| 1 | -5.538007000 | -1.694999000 | -1.006863000 |
| 1 | -4.330082000 | -0.423042000 | -0.781412000 |
| 1 | -4.892340000 | -4.022108000 | -1.117991000 |
| 1 | -3.358524000 | -3.905230000 | -1.983989000 |
| 1 | -3.422652000 | -4.637388000 | -0.367489000 |
| 6 | 4.016991000  | -2.033809000 | 1.321491000  |
| 8 | 3.727342000  | -3.145878000 | 1.699297000  |
| 1 | -2.065627000 | -1.962098000 | -2.827269000 |
| 1 | 4.387135000  | -1.269739000 | 2.037537000  |
| 6 | 3.901693000  | -1.564124000 | -0.111941000 |
| 1 | 3.802307000  | -2.443834000 | -0.753519000 |
| 1 | 2.959187000  | -1.000685000 | -0.171494000 |
| 6 | 5.061814000  | -0.691451000 | -0.525075000 |
| 6 | 6.226717000  | -1.261543000 | -1.046051000 |
| 6 | 5.009502000  | 0.694944000  | -0.360314000 |
| 6 | 7.310329000  | -0.464678000 | -1.403875000 |
| 1 | 6.281462000  | -2.339409000 | -1.176445000 |
| 6 | 6.092939000  | 1.494655000  | -0.714827000 |
| 1 | 4.107817000  | 1.149045000  | 0.040813000  |
| 6 | 7.245996000  | 0.917308000  | -1.239280000 |
| 1 | 8.205629000  | -0.923082000 | -1.813206000 |
| 1 | 6.031759000  | 2.570904000  | -0.583558000 |
| 1 | 8.089883000  | 1.540264000  | -1.520073000 |
| 1 | -3.164331000 | 0.264287000  | 0.798647000  |
| 7 | 0.735161000  | 0.447318000  | 0.536798000  |
| 6 | 1.458022000  | 0.324501000  | 1.781093000  |
| 1 | 1.239388000  | -0.660478000 | 2.225837000  |
| 6 | 1.223715000  | 1.548286000  | -0.258214000 |
| 1 | 0.534536000  | 2.416427000  | -0.302908000 |
| 1 | 2.552106000  | 0.321069000  | 1.586585000  |
| 1 | 2.143838000  | 1.977956000  | 0.181922000  |
| 6 | 1.251067000  | 1.386231000  | 2.877636000  |
| 1 | 1.362185000  | 2.386797000  | 2.438078000  |
| 1 | 0.226008000  | 1.319615000  | 3.256182000  |
| 6 | 2.230675000  | 1.214510000  | 4.035834000  |
| 1 | 3.268314000  | 1.311420000  | 3.694111000  |
| 1 | 2.071109000  | 1.959813000  | 4.822499000  |
| 1 | 2.125888000  | 0.223313000  | 4.492711000  |
| 6 | 1.554024000  | 1.176425000  | -1.711001000 |



|   |              |              |              |
|---|--------------|--------------|--------------|
| 1 | 2.362561000  | 0.435586000  | -1.719615000 |
| 1 | 0.685980000  | 0.686713000  | -2.162591000 |
| 6 | 1.956564000  | 2.386942000  | -2.548668000 |
| 1 | 1.159839000  | 3.140762000  | -2.558306000 |
| 1 | 2.856749000  | 2.864716000  | -2.143806000 |
| 1 | 2.167979000  | 2.113841000  | -3.587787000 |
| 1 | -0.456316000 | -1.505295000 | -2.279422000 |

#### TSA3-4

Coordinates (Angstroms)

|    | X            | Y            | Z            |
|----|--------------|--------------|--------------|
| 44 | 1.058691000  | -0.179886000 | -0.693827000 |
| 6  | -1.019568000 | 1.895108000  | -1.286591000 |
| 6  | -2.142434000 | 2.519967000  | -1.825200000 |
| 6  | -3.123566000 | 1.756359000  | -2.441457000 |
| 6  | -2.970314000 | 0.377133000  | -2.497309000 |
| 6  | -1.820196000 | -0.179980000 | -1.960842000 |
| 7  | -0.857504000 | 0.553785000  | -1.387556000 |
| 1  | -4.003395000 | 2.233571000  | -2.860276000 |
| 1  | -2.253559000 | 3.594505000  | -1.756902000 |
| 1  | -3.720907000 | -0.266349000 | -2.939917000 |
| 1  | -1.665031000 | -1.249759000 | -1.979775000 |
| 6  | 0.044808000  | 2.632723000  | -0.557389000 |
| 6  | -0.038395000 | 3.979681000  | -0.262234000 |
| 6  | 1.043305000  | 4.554654000  | 0.447578000  |
| 6  | 2.132049000  | 3.806756000  | 0.788685000  |
| 6  | 2.204117000  | 2.410073000  | 0.434772000  |
| 7  | 1.087428000  | 1.869944000  | -0.176191000 |
| 1  | 1.007256000  | 5.608218000  | 0.711609000  |
| 1  | -0.888707000 | 4.580630000  | -0.555128000 |
| 1  | 2.971345000  | 4.250833000  | 1.313845000  |
| 6  | 3.307355000  | 1.608556000  | 0.667690000  |
| 1  | 4.172902000  | 2.030460000  | 1.168405000  |
| 15 | 3.234084000  | -0.098584000 | 0.185433000  |
| 6  | 1.155499000  | -1.888055000 | -1.372753000 |
| 8  | 1.222098000  | -2.959970000 | -1.844974000 |
| 6  | 3.516299000  | -1.140298000 | 1.758471000  |
| 6  | 2.677183000  | -0.496131000 | 2.873204000  |
| 6  | 2.971415000  | -2.558664000 | 1.525287000  |
| 6  | 4.968337000  | -1.210924000 | 2.247187000  |
| 1  | 3.027210000  | 0.511424000  | 3.113287000  |
| 1  | 1.628531000  | -0.450143000 | 2.570745000  |
| 1  | 2.753246000  | -1.111585000 | 3.779662000  |

|    |              |              |              |
|----|--------------|--------------|--------------|
| 1  | 3.451828000  | -3.073722000 | 0.689517000  |
| 1  | 3.124455000  | -3.165548000 | 2.426999000  |
| 1  | 1.898430000  | -2.498413000 | 1.327681000  |
| 1  | 4.990977000  | -1.726301000 | 3.215903000  |
| 1  | 5.621745000  | -1.770058000 | 1.573431000  |
| 1  | 5.394899000  | -0.214674000 | 2.400730000  |
| 6  | 4.687083000  | -0.377157000 | -1.010831000 |
| 6  | 4.919338000  | -1.870193000 | -1.276783000 |
| 6  | 4.327358000  | 0.297445000  | -2.345158000 |
| 6  | 5.981622000  | 0.288624000  | -0.514302000 |
| 1  | 5.305837000  | -2.400689000 | -0.402473000 |
| 1  | 4.000815000  | -2.367225000 | -1.604952000 |
| 1  | 5.659349000  | -1.986738000 | -2.078329000 |
| 1  | 4.005030000  | 1.333066000  | -2.197673000 |
| 1  | 5.213616000  | 0.303805000  | -2.992257000 |
| 1  | 3.527623000  | -0.232647000 | -2.865495000 |
| 1  | 6.763609000  | 0.161079000  | -1.273207000 |
| 1  | 5.835252000  | 1.363326000  | -0.371084000 |
| 1  | 6.362892000  | -0.133175000 | 0.415591000  |
| 6  | -0.715507000 | 0.201424000  | 2.003822000  |
| 6  | -2.100042000 | 0.198549000  | 1.483580000  |
| 8  | -0.030701000 | -0.737038000 | 1.275468000  |
| 1  | -2.528184000 | -0.789510000 | 1.205626000  |
| 1  | 1.670162000  | 0.299121000  | -2.065116000 |
| 6  | -2.942315000 | 1.298300000  | 1.226899000  |
| 6  | -2.638864000 | 2.632382000  | 1.599176000  |
| 6  | -4.185190000 | 1.002883000  | 0.616341000  |
| 6  | -3.581485000 | 3.622076000  | 1.403997000  |
| 1  | -1.675145000 | 2.870875000  | 2.035289000  |
| 6  | -5.121638000 | 2.004681000  | 0.423984000  |
| 1  | -4.341823000 | -0.026385000 | 0.299346000  |
| 6  | -4.817122000 | 3.305950000  | 0.822532000  |
| 1  | -3.366156000 | 4.645577000  | 1.691037000  |
| 1  | -6.076362000 | 1.784039000  | -0.041016000 |
| 1  | -5.548590000 | 4.094832000  | 0.672772000  |
| 1  | -0.267536000 | 1.209635000  | 1.955578000  |
| 19 | -0.855352000 | -3.050578000 | 0.539045000  |
| 8  | -3.168846000 | -2.161388000 | 0.212432000  |
| 6  | -4.326757000 | -2.892825000 | 0.142707000  |
| 6  | -5.210320000 | -2.655160000 | 1.389260000  |
| 6  | -5.138140000 | -2.510736000 | -1.117773000 |
| 6  | -4.018721000 | -4.409611000 | 0.061510000  |
| 1  | -4.645801000 | -2.911590000 | 2.293895000  |
| 1  | -5.488589000 | -1.597281000 | 1.464971000  |

|    |              |              |              |
|----|--------------|--------------|--------------|
| 1  | -6.136238000 | -3.245165000 | 1.383675000  |
| 1  | -4.528080000 | -2.681177000 | -2.012560000 |
| 1  | -6.068761000 | -3.083361000 | -1.222874000 |
| 1  | -5.400401000 | -1.445880000 | -1.089925000 |
| 1  | -4.916734000 | -5.032358000 | -0.038748000 |
| 1  | -3.374779000 | -4.610784000 | -0.804827000 |
| 1  | -3.493270000 | -4.736999000 | 0.969568000  |
| 1  | -0.781976000 | -0.033242000 | 3.092878000  |
| 44 | -0.790718000 | -1.184811000 | 0.243447000  |

**TSA4-5**

| -----                   |              |              |              |
|-------------------------|--------------|--------------|--------------|
| Coordinates (Angstroms) |              |              |              |
|                         | X            | Y            | Z            |
| -----                   |              |              |              |
| 44                      | 1.130286000  | -1.170349000 | 0.205484000  |
| 6                       | -1.382511000 | -0.918285000 | 1.834524000  |
| 6                       | -2.569526000 | -1.238506000 | 2.494292000  |
| 6                       | -3.018131000 | -2.546805000 | 2.513803000  |
| 6                       | -2.259462000 | -3.528084000 | 1.882277000  |
| 6                       | -1.101339000 | -3.140876000 | 1.230291000  |
| 7                       | -0.682553000 | -1.866052000 | 1.172802000  |
| 1                       | -3.942474000 | -2.800264000 | 3.021636000  |
| 1                       | -3.143275000 | -0.463309000 | 2.985018000  |
| 1                       | -2.551344000 | -4.572022000 | 1.894189000  |
| 1                       | -0.464321000 | -3.867756000 | 0.734993000  |
| 6                       | -0.798200000 | 0.448156000  | 1.844041000  |
| 6                       | -1.322169000 | 1.494733000  | 2.568503000  |
| 6                       | -0.649721000 | 2.740084000  | 2.495644000  |
| 6                       | 0.476255000  | 2.884319000  | 1.741763000  |
| 6                       | 1.019158000  | 1.766917000  | 1.011905000  |
| 7                       | 0.317448000  | 0.579055000  | 1.084253000  |
| 1                       | -1.041747000 | 3.588651000  | 3.048513000  |
| 1                       | -2.210745000 | 1.386111000  | 3.175407000  |
| 1                       | 0.993829000  | 3.836271000  | 1.690361000  |
| 6                       | 2.189000000  | 1.820190000  | 0.263491000  |
| 15                      | 2.953735000  | 0.260415000  | -0.147191000 |
| 6                       | 1.877733000  | -2.701428000 | -0.521132000 |
| 8                       | 2.346633000  | -3.671414000 | -0.967545000 |
| 6                       | 4.331295000  | 0.009417000  | 1.159694000  |
| 6                       | 3.737577000  | 0.394251000  | 2.526231000  |
| 6                       | 4.768157000  | -1.462644000 | 1.221755000  |
| 6                       | 5.560988000  | 0.899208000  | 0.934609000  |
| 1                       | 3.550582000  | 1.469125000  | 2.595408000  |
| 1                       | 2.799271000  | -0.128528000 | 2.728881000  |

|    |              |              |              |
|----|--------------|--------------|--------------|
| 1  | 4.453373000  | 0.122243000  | 3.311915000  |
| 1  | 5.157708000  | -1.833294000 | 0.270801000  |
| 1  | 5.565801000  | -1.570721000 | 1.967967000  |
| 1  | 3.937054000  | -2.106756000 | 1.518537000  |
| 1  | 6.211377000  | 0.842135000  | 1.816485000  |
| 1  | 6.159230000  | 0.581510000  | 0.077005000  |
| 1  | 5.287617000  | 1.950615000  | 0.799608000  |
| 6  | 3.758053000  | 0.438845000  | -1.857284000 |
| 6  | 4.663890000  | -0.765973000 | -2.148151000 |
| 6  | 2.627861000  | 0.446693000  | -2.898849000 |
| 6  | 4.542869000  | 1.747951000  | -2.042776000 |
| 1  | 5.557570000  | -0.783111000 | -1.519223000 |
| 1  | 4.131793000  | -1.713743000 | -2.019043000 |
| 1  | 5.005612000  | -0.717434000 | -3.189391000 |
| 1  | 2.103957000  | 1.406960000  | -2.884809000 |
| 1  | 3.065411000  | 0.335540000  | -3.898983000 |
| 1  | 1.893481000  | -0.347803000 | -2.738130000 |
| 1  | 4.790398000  | 1.864118000  | -3.105525000 |
| 1  | 3.942262000  | 2.616511000  | -1.754165000 |
| 1  | 5.480557000  | 1.777820000  | -1.487889000 |
| 1  | 2.757816000  | 2.746001000  | 0.267586000  |
| 1  | 1.817413000  | -1.547509000 | 1.576887000  |
| 6  | -0.462970000 | 0.633299000  | -1.776969000 |
| 1  | 0.345736000  | 1.352784000  | -1.978298000 |
| 6  | -1.526474000 | 1.152885000  | -0.956855000 |
| 1  | -2.306736000 | 0.410037000  | -0.643863000 |
| 1  | -1.227194000 | 0.855507000  | -2.636088000 |
| 8  | -0.105132000 | -0.645372000 | -1.716818000 |
| 6  | -1.797586000 | 2.547902000  | -0.735559000 |
| 6  | -2.971886000 | 2.866435000  | -0.031711000 |
| 6  | -0.918229000 | 3.584570000  | -1.109107000 |
| 6  | -3.272837000 | 4.185196000  | 0.281691000  |
| 1  | -3.630911000 | 2.058487000  | 0.268851000  |
| 6  | -1.230479000 | 4.899046000  | -0.809586000 |
| 1  | 0.021127000  | 3.354221000  | -1.599738000 |
| 6  | -2.404829000 | 5.199187000  | -0.113693000 |
| 1  | -4.179571000 | 4.421934000  | 0.828391000  |
| 1  | -0.552001000 | 5.695408000  | -1.097093000 |
| 1  | -2.636476000 | 6.232674000  | 0.125853000  |
| 19 | -1.855567000 | -2.477375000 | -1.708465000 |
| 8  | -3.474154000 | -0.911429000 | -0.716752000 |
| 6  | -4.818349000 | -0.771274000 | -0.926413000 |
| 6  | -5.100068000 | 0.323983000  | -1.982456000 |
| 1  | -6.167510000 | 0.451554000  | -2.205234000 |

|   |              |              |              |
|---|--------------|--------------|--------------|
| 1 | -4.710454000 | 1.289727000  | -1.641420000 |
| 1 | -4.582647000 | 0.072395000  | -2.916753000 |
| 6 | -5.425870000 | -2.099524000 | -1.443432000 |
| 1 | -5.205792000 | -2.902230000 | -0.728458000 |
| 1 | -6.513337000 | -2.058543000 | -1.588169000 |
| 1 | -4.976388000 | -2.365721000 | -2.410451000 |
| 6 | -5.552282000 | -0.398514000 | 0.383190000  |
| 1 | -6.631871000 | -0.252236000 | 0.246846000  |
| 1 | -5.404429000 | -1.188506000 | 1.128346000  |
| 1 | -5.135136000 | 0.526951000  | 0.797794000  |

### TSA8-9

Coordinates (Angstroms)

|    | X            | Y            | Z            |
|----|--------------|--------------|--------------|
| 19 | 1.249873000  | -1.858515000 | -1.995473000 |
| 8  | 2.539550000  | -0.134115000 | -0.903079000 |
| 6  | 3.787537000  | 0.408516000  | -0.703807000 |
| 6  | 4.261395000  | 0.185381000  | 0.749162000  |
| 1  | 4.301876000  | -0.887011000 | 0.973598000  |
| 1  | 5.253330000  | 0.612612000  | 0.944073000  |
| 1  | 3.553081000  | 0.647849000  | 1.446671000  |
| 6  | 4.806613000  | -0.254913000 | -1.655342000 |
| 1  | 4.823751000  | -1.337439000 | -1.477064000 |
| 1  | 4.508828000  | -0.085001000 | -2.697261000 |
| 1  | 5.828051000  | 0.126254000  | -1.529306000 |
| 6  | 3.776951000  | 1.927653000  | -0.979670000 |
| 1  | 3.104590000  | 2.430260000  | -0.274867000 |
| 1  | 4.768479000  | 2.389099000  | -0.885523000 |
| 1  | 3.402759000  | 2.116884000  | -1.992245000 |
| 6  | -1.143060000 | -0.369366000 | -0.173214000 |
| 8  | -0.894955000 | -1.503723000 | -0.621976000 |
| 6  | -2.173873000 | -0.184914000 | 0.930715000  |
| 1  | -1.960360000 | 0.720451000  | 1.503887000  |
| 1  | -2.112419000 | -1.046641000 | 1.602419000  |
| 7  | 0.562615000  | 0.324237000  | 0.905385000  |
| 6  | 0.856469000  | -0.504647000 | 2.073388000  |
| 1  | 1.687238000  | -0.060939000 | 2.648695000  |
| 1  | -0.014629000 | -0.507950000 | 2.744789000  |
| 6  | 1.234741000  | -1.932654000 | 1.689027000  |
| 1  | 0.377362000  | -2.412232000 | 1.206542000  |
| 1  | 2.038283000  | -1.867437000 | 0.944749000  |
| 6  | 1.692122000  | -2.744428000 | 2.896006000  |
| 1  | 0.913616000  | -2.785997000 | 3.666237000  |

|   |              |              |              |
|---|--------------|--------------|--------------|
| 1 | 1.933540000  | -3.774761000 | 2.616490000  |
| 1 | 2.586590000  | -2.305777000 | 3.352401000  |
| 6 | 0.539518000  | 1.744363000  | 1.251240000  |
| 1 | -0.194256000 | 1.913839000  | 2.052533000  |
| 1 | 1.518506000  | 2.037621000  | 1.668715000  |
| 6 | 0.223641000  | 2.639090000  | 0.054938000  |
| 1 | -0.832839000 | 2.537683000  | -0.217950000 |
| 1 | 0.812034000  | 2.291336000  | -0.802027000 |
| 6 | 0.531559000  | 4.104809000  | 0.343435000  |
| 1 | 0.264581000  | 4.741037000  | -0.505540000 |
| 1 | -0.025216000 | 4.464032000  | 1.216379000  |
| 1 | 1.597768000  | 4.252105000  | 0.547393000  |
| 6 | -3.551830000 | -0.080413000 | 0.314227000  |
| 6 | -4.223080000 | 1.142859000  | 0.268040000  |
| 6 | -4.158771000 | -1.200357000 | -0.262889000 |
| 6 | -5.475408000 | 1.247840000  | -0.332834000 |
| 1 | -3.763873000 | 2.022194000  | 0.712667000  |
| 6 | -5.409541000 | -1.098934000 | -0.861923000 |
| 1 | -3.637464000 | -2.152764000 | -0.244022000 |
| 6 | -6.072497000 | 0.126273000  | -0.899304000 |
| 1 | -5.983531000 | 2.207132000  | -0.356644000 |
| 1 | -5.869034000 | -1.978818000 | -1.302270000 |
| 1 | -7.048666000 | 0.205320000  | -1.367664000 |
| 1 | -1.031868000 | 0.510208000  | -0.826651000 |
| 1 | 1.342333000  | 0.184749000  | 0.200372000  |

### TSA9-10

Coordinates (Angstroms)

|    | X            | Y           | Z            |
|----|--------------|-------------|--------------|
| 19 | -2.068179000 | 1.671196000 | -0.734009000 |
| 8  | 0.307707000  | 2.247600000 | -0.528239000 |
| 6  | 1.549509000  | 2.842024000 | -0.320304000 |
| 6  | 2.671422000  | 1.950657000 | -0.880288000 |
| 1  | 2.527318000  | 1.804700000 | -1.956883000 |
| 1  | 3.661840000  | 2.395088000 | -0.724796000 |
| 1  | 2.645914000  | 0.963255000 | -0.406863000 |
| 6  | 1.578612000  | 4.203285000 | -1.032765000 |
| 1  | 1.408274000  | 4.063794000 | -2.105807000 |
| 1  | 0.784006000  | 4.851515000 | -0.644812000 |
| 1  | 2.536154000  | 4.721701000 | -0.900724000 |
| 6  | 1.768172000  | 3.053035000 | 1.187711000  |
| 1  | 1.709890000  | 2.090504000 | 1.705306000  |
| 1  | 2.739596000  | 3.509569000 | 1.414039000  |

|   |              |              |              |
|---|--------------|--------------|--------------|
| 1 | 0.983238000  | 3.702776000  | 1.592643000  |
| 6 | 0.220246000  | -0.836442000 | 0.116795000  |
| 8 | -0.029623000 | -0.066404000 | -0.992311000 |
| 6 | -0.858450000 | -1.953290000 | 0.213505000  |
| 1 | -0.649422000 | -2.600557000 | 1.073024000  |
| 1 | -0.812559000 | -2.571221000 | -0.688122000 |
| 7 | 1.600133000  | -1.352100000 | 0.159915000  |
| 6 | 1.938568000  | -2.354393000 | -0.848704000 |
| 1 | 2.989117000  | -2.622959000 | -0.679903000 |
| 1 | 1.366999000  | -3.294315000 | -0.713069000 |
| 6 | 1.808457000  | -1.897586000 | -2.300532000 |
| 1 | 0.763917000  | -1.683544000 | -2.533752000 |
| 1 | 2.340923000  | -0.947767000 | -2.415044000 |
| 6 | 2.370780000  | -2.944543000 | -3.259184000 |
| 1 | 1.854398000  | -3.905724000 | -3.149669000 |
| 1 | 2.259350000  | -2.627815000 | -4.300847000 |
| 1 | 3.437404000  | -3.122663000 | -3.079208000 |
| 6 | 2.017020000  | -1.785682000 | 1.490362000  |
| 1 | 1.325108000  | -2.532071000 | 1.929390000  |
| 1 | 2.974174000  | -2.307423000 | 1.377378000  |
| 6 | 2.231029000  | -0.654963000 | 2.497167000  |
| 1 | 1.296533000  | -0.112955000 | 2.678231000  |
| 1 | 2.933254000  | 0.067759000  | 2.067367000  |
| 6 | 2.763783000  | -1.183043000 | 3.827018000  |
| 1 | 2.906995000  | -0.372277000 | 4.547609000  |
| 1 | 2.070853000  | -1.905501000 | 4.273352000  |
| 1 | 3.728098000  | -1.686722000 | 3.697110000  |
| 6 | -2.228457000 | -1.350168000 | 0.347593000  |
| 6 | -2.592123000 | -0.667041000 | 1.516623000  |
| 6 | -3.139304000 | -1.365883000 | -0.715149000 |
| 6 | -3.815670000 | -0.006857000 | 1.615127000  |
| 1 | -1.901047000 | -0.646370000 | 2.355382000  |
| 6 | -4.368723000 | -0.713890000 | -0.620473000 |
| 1 | -2.874138000 | -1.886428000 | -1.630857000 |
| 6 | -4.709061000 | -0.022459000 | 0.542796000  |
| 1 | -4.073922000 | 0.515904000  | 2.531183000  |
| 1 | -5.062617000 | -0.745529000 | -1.455384000 |
| 1 | -5.666700000 | 0.482607000  | 0.620497000  |
| 1 | 0.124674000  | -0.228266000 | 1.034862000  |
| 1 | 0.307314000  | 1.016782000  | -0.784280000 |

-----  
**TSA12-13**  
-----

Coordinates (Angstroms)  
-----

|    | X            | Y            | Z            |
|----|--------------|--------------|--------------|
| 44 | -1.087517000 | -1.365327000 | -0.453342000 |
| 6  | 1.114087000  | -2.505435000 | 1.255537000  |
| 6  | 2.078159000  | -3.387553000 | 1.738930000  |
| 6  | 2.538554000  | -4.411890000 | 0.923852000  |
| 6  | 2.025142000  | -4.529719000 | -0.362260000 |
| 6  | 1.066384000  | -3.618745000 | -0.780055000 |
| 7  | 0.616193000  | -2.627738000 | 0.001135000  |
| 1  | 3.285871000  | -5.108168000 | 1.288860000  |
| 1  | 2.459724000  | -3.277695000 | 2.746897000  |
| 1  | 2.356375000  | -5.309190000 | -1.038111000 |
| 1  | 0.633154000  | -3.672831000 | -1.771730000 |
| 6  | 0.597002000  | -1.358301000 | 2.043570000  |
| 6  | 1.140150000  | -0.903098000 | 3.236774000  |
| 6  | 0.614550000  | 0.268730000  | 3.789072000  |
| 6  | -0.370153000 | 0.976707000  | 3.125665000  |
| 6  | -0.862942000 | 0.489040000  | 1.902063000  |
| 7  | -0.411055000 | -0.701196000 | 1.448915000  |
| 1  | 1.011735000  | 0.644700000  | 4.726782000  |
| 1  | 1.963583000  | -1.416731000 | 3.716328000  |
| 1  | -0.745281000 | 1.915323000  | 3.517514000  |
| 6  | -1.693172000 | 1.235080000  | 0.961602000  |
| 15 | -2.793525000 | 0.171068000  | -0.038743000 |
| 6  | -1.638473000 | -1.964140000 | -2.117690000 |
| 8  | -1.983552000 | -2.371631000 | -3.150365000 |
| 6  | -3.453995000 | 1.301998000  | -1.410213000 |
| 6  | -2.389475000 | 1.402365000  | -2.517737000 |
| 6  | -4.717111000 | 0.712869000  | -2.055976000 |
| 6  | -3.743912000 | 2.718176000  | -0.887244000 |
| 1  | -1.400973000 | 1.657520000  | -2.136729000 |
| 1  | -2.290709000 | 0.455455000  | -3.055009000 |
| 1  | -2.708754000 | 2.165060000  | -3.238703000 |
| 1  | -5.592220000 | 0.747677000  | -1.403289000 |
| 1  | -4.957835000 | 1.299493000  | -2.950495000 |
| 1  | -4.561130000 | -0.321434000 | -2.378429000 |
| 1  | -4.172300000 | 3.316480000  | -1.700333000 |
| 1  | -4.456409000 | 2.732232000  | -0.059577000 |
| 1  | -2.827675000 | 3.218784000  | -0.562839000 |
| 6  | -4.218075000 | -0.444820000 | 1.051615000  |
| 6  | -4.976883000 | -1.578114000 | 0.341661000  |
| 6  | -3.601807000 | -1.033676000 | 2.333074000  |
| 6  | -5.179178000 | 0.675304000  | 1.470986000  |
| 1  | -5.535054000 | -1.236863000 | -0.531256000 |
| 1  | -4.289699000 | -2.367946000 | 0.023521000  |



|   |              |              |              |
|---|--------------|--------------|--------------|
| 1 | -5.699842000 | -2.017698000 | 1.039616000  |
| 1 | -3.119924000 | -0.268100000 | 2.947321000  |
| 1 | -4.404031000 | -1.479310000 | 2.933130000  |
| 1 | -2.871397000 | -1.815544000 | 2.110153000  |
| 1 | -5.904088000 | 0.278721000  | 2.192412000  |
| 1 | -4.647187000 | 1.497797000  | 1.961369000  |
| 1 | -5.748428000 | 1.084404000  | 0.633609000  |
| 6 | 1.399504000  | 0.765698000  | -0.665350000 |
| 8 | 0.027467000  | 0.664144000  | -0.886610000 |
| 1 | -1.932541000 | -2.572379000 | 0.136627000  |
| 7 | 1.869851000  | 2.122921000  | -0.444359000 |
| 6 | 1.444754000  | 3.116732000  | -1.423891000 |
| 1 | 1.345276000  | 2.598651000  | -2.380246000 |
| 1 | 2.252484000  | 3.850750000  | -1.561614000 |
| 6 | 0.130508000  | 3.885421000  | -1.146547000 |
| 1 | -0.529755000 | 3.257163000  | -0.542611000 |
| 1 | -0.387478000 | 4.037761000  | -2.100993000 |
| 6 | 0.310160000  | 5.246295000  | -0.473603000 |
| 1 | 0.959720000  | 5.897810000  | -1.069597000 |
| 1 | -0.652179000 | 5.757009000  | -0.358841000 |
| 1 | 0.756002000  | 5.158972000  | 0.522191000  |
| 6 | 1.889478000  | 2.564251000  | 0.936443000  |
| 1 | 2.030222000  | 1.679358000  | 1.566259000  |
| 1 | 0.927730000  | 3.007623000  | 1.256525000  |
| 6 | 3.025481000  | 3.541316000  | 1.238962000  |
| 1 | 3.974565000  | 3.045853000  | 1.006021000  |
| 1 | 2.959277000  | 4.416712000  | 0.582424000  |
| 6 | 3.002218000  | 3.999215000  | 2.694533000  |
| 1 | 3.076682000  | 3.146703000  | 3.379977000  |
| 1 | 3.831270000  | 4.678022000  | 2.916745000  |
| 1 | 2.070237000  | 4.527350000  | 2.928597000  |
| 1 | -2.094151000 | 2.169178000  | 1.354039000  |
| 1 | -0.726709000 | 1.227677000  | -0.008277000 |
| 6 | 2.150657000  | 0.088177000  | -1.832494000 |
| 1 | 1.661581000  | -0.875057000 | -2.007961000 |
| 1 | 2.025117000  | 0.678637000  | -2.746054000 |
| 6 | 3.608564000  | -0.116418000 | -1.516269000 |
| 6 | 4.544788000  | 0.906252000  | -1.700445000 |
| 6 | 4.048633000  | -1.319346000 | -0.958418000 |
| 6 | 5.878336000  | 0.727222000  | -1.344959000 |
| 1 | 4.218371000  | 1.852483000  | -2.121396000 |
| 6 | 5.380816000  | -1.504081000 | -0.597942000 |
| 1 | 3.334201000  | -2.123556000 | -0.807288000 |
| 6 | 6.302967000  | -0.479586000 | -0.791320000 |

|   |             |              |              |
|---|-------------|--------------|--------------|
| 1 | 6.590864000 | 1.532353000  | -1.500349000 |
| 1 | 5.697236000 | -2.450644000 | -0.168380000 |
| 1 | 7.344427000 | -0.619532000 | -0.517174000 |
| 1 | 1.693117000 | 0.213779000  | 0.243002000  |

**TSA12-14**

Coordinates (Angstroms)

|    | X            | Y            | Z            |
|----|--------------|--------------|--------------|
| 44 | 0.662707000  | -0.022228000 | -1.063801000 |
| 6  | -1.469461000 | 1.834232000  | -2.052831000 |
| 6  | -2.469995000 | 2.383972000  | -2.849823000 |
| 6  | -3.089742000 | 1.597094000  | -3.811911000 |
| 6  | -2.696354000 | 0.273132000  | -3.953475000 |
| 6  | -1.682513000 | -0.208211000 | -3.137539000 |
| 7  | -1.077489000 | 0.547284000  | -2.214087000 |
| 1  | -3.871844000 | 2.014187000  | -4.437131000 |
| 1  | -2.767214000 | 3.416911000  | -2.718580000 |
| 1  | -3.156358000 | -0.383257000 | -4.682649000 |
| 1  | -1.338182000 | -1.232948000 | -3.210132000 |
| 6  | -0.820062000 | 2.575475000  | -0.939730000 |
| 6  | -1.188235000 | 3.843731000  | -0.518568000 |
| 6  | -0.585834000 | 4.352807000  | 0.634735000  |
| 6  | 0.336661000  | 3.597770000  | 1.333614000  |
| 6  | 0.687741000  | 2.323014000  | 0.857717000  |
| 7  | 0.113271000  | 1.871019000  | -0.275240000 |
| 1  | -0.859490000 | 5.340873000  | 0.991055000  |
| 1  | -1.939221000 | 4.420755000  | -1.042572000 |
| 1  | 0.791939000  | 3.972203000  | 2.243074000  |
| 6  | 1.571596000  | 1.381968000  | 1.559339000  |
| 15 | 2.494475000  | 0.324301000  | 0.382032000  |
| 6  | 1.183497000  | -1.602493000 | -1.909242000 |
| 8  | 1.537665000  | -2.512398000 | -2.531948000 |
| 6  | 3.295385000  | -1.096570000 | 1.393705000  |
| 6  | 2.989134000  | -2.395965000 | 0.632219000  |
| 6  | 4.817553000  | -1.023592000 | 1.589608000  |
| 6  | 2.681436000  | -1.155091000 | 2.802682000  |
| 1  | 3.373469000  | -3.252073000 | 1.199772000  |
| 1  | 1.918208000  | -2.540937000 | 0.482697000  |
| 1  | 3.465543000  | -2.407265000 | -0.353692000 |
| 1  | 5.112664000  | -0.183469000 | 2.220846000  |
| 1  | 5.128846000  | -1.937686000 | 2.109049000  |
| 1  | 5.378415000  | -0.982798000 | 0.653781000  |
| 1  | 3.037591000  | -2.068084000 | 3.295515000  |

|   |              |              |              |
|---|--------------|--------------|--------------|
| 1 | 3.016004000  | -0.306079000 | 3.408922000  |
| 1 | 1.589554000  | -1.145434000 | 2.815779000  |
| 6 | 3.840053000  | 1.403691000  | -0.428403000 |
| 6 | 4.500437000  | 0.598302000  | -1.557730000 |
| 6 | 3.175526000  | 2.644875000  | -1.054717000 |
| 6 | 4.893992000  | 1.937119000  | 0.560381000  |
| 1 | 4.979975000  | -0.317389000 | -1.201654000 |
| 1 | 3.764411000  | 0.317358000  | -2.316963000 |
| 1 | 5.273926000  | 1.206782000  | -2.041707000 |
| 1 | 2.779616000  | 3.324254000  | -0.294158000 |
| 1 | 3.939917000  | 3.195084000  | -1.616241000 |
| 1 | 2.371964000  | 2.388759000  | -1.747063000 |
| 1 | 5.392529000  | 2.805358000  | 0.114213000  |
| 1 | 4.442070000  | 2.273009000  | 1.500094000  |
| 1 | 5.670800000  | 1.210331000  | 0.789767000  |
| 6 | -0.999162000 | -0.856601000 | 1.641133000  |
| 8 | -0.286016000 | -0.201365000 | 2.583480000  |
| 7 | -2.447466000 | -0.567444000 | 1.659433000  |
| 6 | -3.202411000 | -1.172630000 | 2.754404000  |
| 1 | -3.254409000 | -2.253179000 | 2.568114000  |
| 1 | -4.237170000 | -0.825602000 | 2.668999000  |
| 6 | -2.731201000 | -0.963342000 | 4.203473000  |
| 1 | -1.736197000 | -1.401706000 | 4.326196000  |
| 1 | -3.419114000 | -1.532265000 | 4.845180000  |
| 6 | -2.673231000 | 0.490946000  | 4.661893000  |
| 1 | -3.608688000 | 1.024236000  | 4.451211000  |
| 1 | -2.494779000 | 0.555344000  | 5.741158000  |
| 1 | -1.850140000 | 0.995286000  | 4.151146000  |
| 6 | -2.710242000 | 0.834141000  | 1.366566000  |
| 1 | -2.236075000 | 1.022839000  | 0.399029000  |
| 1 | -2.230352000 | 1.522011000  | 2.080658000  |
| 6 | -4.186843000 | 1.198647000  | 1.228368000  |
| 1 | -4.688388000 | 0.438968000  | 0.615735000  |
| 1 | -4.680699000 | 1.193817000  | 2.206383000  |
| 6 | -4.366042000 | 2.576303000  | 0.594616000  |
| 1 | -3.972099000 | 2.592650000  | -0.427733000 |
| 1 | -5.422622000 | 2.858875000  | 0.549756000  |
| 1 | -3.837137000 | 3.346436000  | 1.167301000  |
| 1 | 2.161811000  | 1.854676000  | 2.347770000  |
| 1 | 0.704364000  | 0.595702000  | 2.086827000  |
| 6 | -0.747337000 | -2.384844000 | 1.646883000  |
| 1 | 0.315157000  | -2.516120000 | 1.860711000  |
| 1 | -1.267845000 | -2.842953000 | 2.495401000  |
| 6 | -1.074019000 | -3.132461000 | 0.372885000  |

|   |              |              |              |
|---|--------------|--------------|--------------|
| 6 | -0.309438000 | -4.248190000 | 0.011167000  |
| 6 | -2.112386000 | -2.742690000 | -0.481715000 |
| 6 | -0.567936000 | -4.953381000 | -1.160268000 |
| 1 | 0.505756000  | -4.564846000 | 0.658032000  |
| 6 | -2.371790000 | -3.445751000 | -1.656512000 |
| 1 | -2.710493000 | -1.880228000 | -0.200789000 |
| 6 | -1.601116000 | -4.552300000 | -2.003631000 |
| 1 | 0.044664000  | -5.811886000 | -1.420008000 |
| 1 | -3.187039000 | -3.127551000 | -2.301702000 |
| 1 | -1.802817000 | -5.097539000 | -2.921086000 |
| 1 | -0.689986000 | -0.533612000 | 0.588770000  |
| 1 | 1.485563000  | 0.647192000  | -2.201039000 |

### TSA13-14

Coordinates (Angstroms)

|    | X            | Y            | Z            |
|----|--------------|--------------|--------------|
| 44 | -0.646176000 | -0.146424000 | -0.904690000 |
| 6  | 1.088952000  | -2.499874000 | -1.496921000 |
| 6  | 2.002729000  | -3.336122000 | -2.133930000 |
| 6  | 2.834283000  | -2.818229000 | -3.116640000 |
| 6  | 2.731262000  | -1.470697000 | -3.439009000 |
| 6  | 1.786698000  | -0.698376000 | -2.779253000 |
| 7  | 0.979146000  | -1.193143000 | -1.833394000 |
| 1  | 3.554074000  | -3.457113000 | -3.616695000 |
| 1  | 2.076630000  | -4.380626000 | -1.857801000 |
| 1  | 3.364274000  | -1.016981000 | -4.192576000 |
| 1  | 1.660477000  | 0.354425000  | -3.000692000 |
| 6  | 0.223660000  | -2.951637000 | -0.382847000 |
| 6  | 0.242898000  | -4.231822000 | 0.161138000  |
| 6  | -0.554473000 | -4.498500000 | 1.268059000  |
| 6  | -1.340731000 | -3.490682000 | 1.809236000  |
| 6  | -1.332988000 | -2.231057000 | 1.214267000  |
| 7  | -0.572956000 | -1.996900000 | 0.132253000  |
| 1  | -0.551487000 | -5.487665000 | 1.713329000  |
| 1  | 0.870823000  | -5.008322000 | -0.257577000 |
| 1  | -1.953356000 | -3.669231000 | 2.685478000  |
| 6  | -2.100690000 | -1.058558000 | 1.753644000  |
| 15 | -2.579979000 | 0.111028000  | 0.384390000  |
| 6  | -0.769869000 | 1.377352000  | -1.963168000 |
| 8  | -0.892318000 | 2.264021000  | -2.700474000 |
| 6  | -3.025451000 | 1.768071000  | 1.230945000  |
| 6  | -2.531866000 | 2.875716000  | 0.286034000  |
| 6  | -4.512998000 | 2.020806000  | 1.509165000  |

|   |              |              |              |
|---|--------------|--------------|--------------|
| 6 | -2.297204000 | 1.866482000  | 2.581174000  |
| 1 | -2.735819000 | 3.855033000  | 0.735670000  |
| 1 | -1.460709000 | 2.800534000  | 0.097826000  |
| 1 | -3.041372000 | 2.839819000  | -0.682778000 |
| 1 | -4.938212000 | 1.290191000  | 2.200705000  |
| 1 | -4.603652000 | 3.004829000  | 1.984518000  |
| 1 | -5.117541000 | 2.048295000  | 0.599678000  |
| 1 | -2.371686000 | 2.898972000  | 2.944419000  |
| 1 | -2.774725000 | 1.226396000  | 3.331652000  |
| 1 | -1.240501000 | 1.590416000  | 2.541408000  |
| 6 | -4.136745000 | -0.685692000 | -0.372689000 |
| 6 | -4.517909000 | 0.136022000  | -1.612801000 |
| 6 | -3.787751000 | -2.119960000 | -0.814305000 |
| 6 | -5.343191000 | -0.816435000 | 0.576543000  |
| 1 | -4.766028000 | 1.173112000  | -1.364610000 |
| 1 | -3.700284000 | 0.146676000  | -2.339592000 |
| 1 | -5.399046000 | -0.306527000 | -2.092635000 |
| 1 | -3.665136000 | -2.789021000 | 0.043704000  |
| 1 | -4.620919000 | -2.509802000 | -1.410981000 |
| 1 | -2.886124000 | -2.157942000 | -1.427128000 |
| 1 | -6.034441000 | -1.560505000 | 0.163677000  |
| 1 | -5.057252000 | -1.166584000 | 1.574202000  |
| 1 | -5.905385000 | 0.108486000  | 0.686768000  |
| 6 | 1.254906000  | 0.966649000  | 1.617190000  |
| 8 | 0.620558000  | 0.513013000  | 2.602672000  |
| 7 | 2.552235000  | 0.413467000  | 1.308897000  |
| 6 | 3.689516000  | 1.186912000  | 1.817433000  |
| 1 | 3.767999000  | 2.116746000  | 1.240821000  |
| 1 | 4.594646000  | 0.620520000  | 1.577354000  |
| 6 | 3.727871000  | 1.549582000  | 3.314081000  |
| 1 | 2.929884000  | 2.262873000  | 3.545455000  |
| 1 | 4.672076000  | 2.086327000  | 3.478334000  |
| 6 | 3.621457000  | 0.384614000  | 4.294507000  |
| 1 | 4.370593000  | -0.389589000 | 4.090743000  |
| 1 | 3.776361000  | 0.732677000  | 5.321551000  |
| 1 | 2.626871000  | -0.064245000 | 4.236974000  |
| 6 | 2.639863000  | -1.030380000 | 1.476763000  |
| 1 | 1.656050000  | -1.431545000 | 1.224785000  |
| 1 | 2.831069000  | -1.331952000 | 2.515484000  |
| 6 | 3.693035000  | -1.664811000 | 0.567901000  |
| 1 | 3.436608000  | -1.456457000 | -0.476443000 |
| 1 | 4.673375000  | -1.205403000 | 0.738402000  |
| 6 | 3.819055000  | -3.167712000 | 0.802438000  |
| 1 | 2.853002000  | -3.671802000 | 0.693557000  |

|   |              |              |              |
|---|--------------|--------------|--------------|
| 1 | 4.520088000  | -3.624469000 | 0.096565000  |
| 1 | 4.181320000  | -3.377926000 | 1.814969000  |
| 1 | -2.930385000 | -1.377761000 | 2.390176000  |
| 1 | -1.379025000 | -0.496831000 | 2.363185000  |
| 6 | 1.133319000  | 2.471561000  | 1.312409000  |
| 1 | 0.101061000  | 2.732459000  | 1.546420000  |
| 1 | 1.735116000  | 3.001317000  | 2.062453000  |
| 6 | 1.473553000  | 3.033878000  | -0.050524000 |
| 6 | 0.984163000  | 4.304464000  | -0.371648000 |
| 6 | 2.263089000  | 2.375386000  | -0.998015000 |
| 6 | 1.277274000  | 4.908513000  | -1.590018000 |
| 1 | 0.357876000  | 4.827865000  | 0.347770000  |
| 6 | 2.562046000  | 2.979807000  | -2.217013000 |
| 1 | 2.626909000  | 1.379636000  | -0.765429000 |
| 6 | 2.073103000  | 4.246976000  | -2.520796000 |
| 1 | 0.878843000  | 5.893949000  | -1.813051000 |
| 1 | 3.185965000  | 2.453355000  | -2.935308000 |
| 1 | 2.304078000  | 4.713030000  | -3.473972000 |
| 1 | 0.460176000  | 0.517584000  | 0.359250000  |
| 1 | -1.561858000 | -0.833685000 | -2.071503000 |

### TSA15-1

Coordinates (Angstroms)

|    | X            | Y            | Z            |
|----|--------------|--------------|--------------|
| 44 | -0.372898000 | -0.818740000 | -0.105795000 |
| 6  | -3.159398000 | 0.286289000  | 0.056849000  |
| 6  | -4.524795000 | 0.368210000  | 0.324867000  |
| 6  | -5.268094000 | -0.796067000 | 0.447351000  |
| 6  | -4.627717000 | -2.020881000 | 0.296562000  |
| 6  | -3.263610000 | -2.031206000 | 0.051501000  |
| 7  | -2.536532000 | -0.911469000 | -0.060288000 |
| 1  | -6.331539000 | -0.746705000 | 0.655973000  |
| 1  | -4.997934000 | 1.335767000  | 0.443116000  |
| 1  | -5.165840000 | -2.958089000 | 0.376946000  |
| 1  | -2.718489000 | -2.961524000 | -0.055314000 |
| 6  | -2.304024000 | 1.473199000  | -0.169150000 |
| 6  | -2.771431000 | 2.757571000  | -0.373448000 |
| 6  | -1.842625000 | 3.748887000  | -0.728190000 |
| 6  | -0.516272000 | 3.428551000  | -0.913660000 |
| 6  | -0.084566000 | 2.099027000  | -0.702025000 |
| 7  | -0.991393000 | 1.182417000  | -0.277158000 |
| 1  | -2.180796000 | 4.768622000  | -0.884164000 |
| 1  | -3.825881000 | 2.992507000  | -0.300353000 |

|    |              |              |              |
|----|--------------|--------------|--------------|
| 1  | 0.202844000  | 4.177392000  | -1.226283000 |
| 6  | 1.206656000  | 1.568251000  | -1.047223000 |
| 15 | 1.748582000  | 0.155026000  | -0.027788000 |
| 6  | 0.137837000  | -2.605504000 | -0.044892000 |
| 8  | 0.443446000  | -3.725782000 | 0.012920000  |
| 6  | 2.306954000  | 0.757323000  | 1.680488000  |
| 6  | 1.216365000  | 1.710926000  | 2.200178000  |
| 6  | 2.385513000  | -0.438214000 | 2.645346000  |
| 6  | 3.637258000  | 1.520877000  | 1.675539000  |
| 1  | 1.184115000  | 2.644000000  | 1.631085000  |
| 1  | 0.226933000  | 1.247897000  | 2.170929000  |
| 1  | 1.439926000  | 1.964579000  | 3.243152000  |
| 1  | 3.171688000  | -1.147651000 | 2.380562000  |
| 1  | 2.604291000  | -0.068246000 | 3.654484000  |
| 1  | 1.435322000  | -0.978232000 | 2.677360000  |
| 1  | 3.802110000  | 1.956522000  | 2.668486000  |
| 1  | 4.492160000  | 0.874308000  | 1.461473000  |
| 1  | 3.631587000  | 2.343339000  | 0.953060000  |
| 6  | 3.199538000  | -0.588212000 | -0.989015000 |
| 6  | 3.915495000  | -1.630710000 | -0.117541000 |
| 6  | 2.658402000  | -1.309456000 | -2.236151000 |
| 6  | 4.203198000  | 0.471191000  | -1.471856000 |
| 1  | 4.477206000  | -1.175001000 | 0.701467000  |
| 1  | 3.214842000  | -2.359678000 | 0.302221000  |
| 1  | 4.633116000  | -2.181699000 | -0.736302000 |
| 1  | 2.155001000  | -0.625319000 | -2.922923000 |
| 1  | 3.506838000  | -1.755272000 | -2.769512000 |
| 1  | 1.958258000  | -2.106952000 | -1.981341000 |
| 1  | 5.021089000  | -0.033219000 | -2.000884000 |
| 1  | 3.742671000  | 1.167515000  | -2.178372000 |
| 1  | 4.648384000  | 1.048007000  | -0.660661000 |
| 1  | 0.575111000  | 0.497786000  | -1.878606000 |
| 1  | 1.938210000  | 2.293599000  | -1.400059000 |
| 1  | -0.521749000 | -0.911422000 | 1.481387000  |
| 1  | -0.020893000 | -0.314345000 | -1.989539000 |

**TSA16-17**

Coordinates (Angstroms)

|    | X            | Y            | Z            |
|----|--------------|--------------|--------------|
| 44 | -0.532203000 | -1.274004000 | -0.469743000 |
| 6  | -3.195670000 | -0.267569000 | 0.478730000  |
| 6  | -4.573023000 | -0.078165000 | 0.594774000  |
| 6  | -5.431157000 | -0.725640000 | -0.280497000 |

|    |              |              |              |
|----|--------------|--------------|--------------|
| 6  | -4.890170000 | -1.551364000 | -1.259757000 |
| 6  | -3.513341000 | -1.694473000 | -1.321642000 |
| 7  | -2.677679000 | -1.072587000 | -0.478857000 |
| 1  | -6.503868000 | -0.586256000 | -0.198933000 |
| 1  | -4.969966000 | 0.574622000  | 1.362464000  |
| 1  | -5.517818000 | -2.079947000 | -1.967871000 |
| 1  | -3.043956000 | -2.326933000 | -2.065599000 |
| 6  | -2.212956000 | 0.416627000  | 1.353141000  |
| 6  | -2.553091000 | 1.244271000  | 2.415127000  |
| 6  | -1.514850000 | 1.839140000  | 3.141167000  |
| 6  | -0.202626000 | 1.643183000  | 2.765488000  |
| 6  | 0.095440000  | 0.827492000  | 1.648093000  |
| 7  | -0.930000000 | 0.198254000  | 1.014091000  |
| 1  | -1.747927000 | 2.462776000  | 3.999038000  |
| 1  | -3.585688000 | 1.412709000  | 2.692824000  |
| 1  | 0.611104000  | 2.113626000  | 3.306798000  |
| 6  | 1.399531000  | 0.705167000  | 1.045773000  |
| 15 | 1.644800000  | -0.910877000 | 0.244852000  |
| 6  | -0.190236000 | -2.591538000 | -1.723429000 |
| 8  | 0.023247000  | -3.419612000 | -2.515571000 |
| 6  | 2.256863000  | -2.050979000 | 1.655249000  |
| 6  | 1.288330000  | -1.863688000 | 2.837564000  |
| 6  | 2.181617000  | -3.522995000 | 1.222054000  |
| 6  | 3.662113000  | -1.705434000 | 2.167833000  |
| 1  | 1.392118000  | -0.877245000 | 3.298249000  |
| 1  | 0.247941000  | -2.005827000 | 2.533863000  |
| 1  | 1.522575000  | -2.611045000 | 3.605462000  |
| 1  | 2.904718000  | -3.778458000 | 0.445577000  |
| 1  | 2.389553000  | -4.168414000 | 2.084761000  |
| 1  | 1.179604000  | -3.758747000 | 0.851972000  |
| 1  | 3.875384000  | -2.300655000 | 3.064537000  |
| 1  | 4.452788000  | -1.921914000 | 1.446144000  |
| 1  | 3.737738000  | -0.650979000 | 2.455314000  |
| 6  | 3.063611000  | -0.694236000 | -1.007018000 |
| 6  | 3.751832000  | -2.034418000 | -1.309684000 |
| 6  | 2.479083000  | -0.212342000 | -2.342910000 |
| 6  | 4.095748000  | 0.337564000  | -0.527044000 |
| 1  | 4.326283000  | -2.424482000 | -0.468589000 |
| 1  | 3.026560000  | -2.793693000 | -1.617905000 |
| 1  | 4.453005000  | -1.894344000 | -2.141309000 |
| 1  | 1.923744000  | 0.718189000  | -2.245735000 |
| 1  | 3.299510000  | -0.041508000 | -3.051717000 |
| 1  | 1.792671000  | -0.944945000 | -2.770451000 |
| 1  | 4.877902000  | 0.457444000  | -1.287404000 |



|   |              |              |              |
|---|--------------|--------------|--------------|
| 1 | 3.633297000  | 1.317018000  | -0.368532000 |
| 1 | 4.586570000  | 0.046185000  | 0.403758000  |
| 1 | 0.998158000  | 1.738884000  | -0.067490000 |
| 1 | 2.216955000  | 1.078434000  | 1.666221000  |
| 1 | -0.749059000 | -2.441606000 | 0.713973000  |
| 1 | -0.405515000 | -0.044487000 | -1.667914000 |
| 7 | 0.548606000  | 2.452818000  | -0.921645000 |
| 6 | -0.689621000 | 3.167334000  | -0.499083000 |
| 1 | -0.832618000 | 3.008843000  | 0.571922000  |
| 1 | -0.540830000 | 4.241041000  | -0.653645000 |
| 6 | -1.910415000 | 2.686378000  | -1.275520000 |
| 1 | -1.773271000 | 2.918418000  | -2.339059000 |
| 1 | -1.964396000 | 1.595743000  | -1.199919000 |
| 6 | -3.197814000 | 3.319245000  | -0.759639000 |
| 1 | -4.063876000 | 2.933342000  | -1.304355000 |
| 1 | -3.343449000 | 3.095016000  | 0.302551000  |
| 1 | -3.188095000 | 4.409008000  | -0.874626000 |
| 6 | 1.626828000  | 3.329719000  | -1.422130000 |
| 1 | 2.365119000  | 2.695749000  | -1.920193000 |
| 1 | 1.217429000  | 4.015461000  | -2.173448000 |
| 6 | 2.295139000  | 4.097482000  | -0.286414000 |
| 1 | 2.659725000  | 3.379955000  | 0.457183000  |
| 1 | 1.558312000  | 4.729750000  | 0.222339000  |
| 6 | 3.449478000  | 4.956541000  | -0.792968000 |
| 1 | 3.922028000  | 5.499353000  | 0.030192000  |
| 1 | 4.219261000  | 4.341867000  | -1.271778000 |
| 1 | 3.105980000  | 5.694121000  | -1.526216000 |
| 1 | 0.282913000  | 1.736967000  | -1.610636000 |

### TSA17-18

| -----                   |              |              |              |
|-------------------------|--------------|--------------|--------------|
| Coordinates (Angstroms) |              |              |              |
|                         | X            | Y            | Z            |
| -----                   |              |              |              |
| 44                      | 0.084647000  | -0.990915000 | -0.747250000 |
| 6                       | -2.694928000 | -1.475051000 | 0.267785000  |
| 6                       | -4.020895000 | -1.903403000 | 0.336439000  |
| 6                       | -4.621595000 | -2.465285000 | -0.779789000 |
| 6                       | -3.882236000 | -2.590755000 | -1.949965000 |
| 6                       | -2.566649000 | -2.154142000 | -1.949697000 |
| 7                       | -1.982505000 | -1.608063000 | -0.875498000 |
| 1                       | -5.652460000 | -2.800607000 | -0.734659000 |
| 1                       | -4.578804000 | -1.799972000 | 1.258432000  |
| 1                       | -4.307241000 | -3.023233000 | -2.848149000 |
| 1                       | -1.944141000 | -2.239207000 | -2.832630000 |

|    |              |              |              |
|----|--------------|--------------|--------------|
| 6  | -1.997176000 | -0.819809000 | 1.405707000  |
| 6  | -2.606621000 | -0.543930000 | 2.616582000  |
| 6  | -1.841092000 | 0.140690000  | 3.585639000  |
| 6  | -0.551706000 | 0.514366000  | 3.324937000  |
| 6  | 0.060668000  | 0.195245000  | 2.063825000  |
| 7  | -0.724481000 | -0.468620000 | 1.143487000  |
| 1  | -2.286635000 | 0.372168000  | 4.548958000  |
| 1  | -3.629472000 | -0.827623000 | 2.824378000  |
| 1  | 0.037902000  | 1.037586000  | 4.070550000  |
| 6  | 1.372663000  | 0.521248000  | 1.720941000  |
| 15 | 2.065056000  | -0.332242000 | 0.314341000  |
| 6  | 0.814602000  | -1.525892000 | -2.368873000 |
| 8  | 1.271059000  | -1.888450000 | -3.375898000 |
| 6  | 3.072555000  | -1.792682000 | 1.027428000  |
| 6  | 2.185675000  | -2.472621000 | 2.085463000  |
| 6  | 3.391277000  | -2.822524000 | -0.066955000 |
| 6  | 4.366254000  | -1.362922000 | 1.732175000  |
| 1  | 2.016070000  | -1.820262000 | 2.946465000  |
| 1  | 1.214372000  | -2.762540000 | 1.677148000  |
| 1  | 2.689696000  | -3.379938000 | 2.440714000  |
| 1  | 4.049147000  | -2.428105000 | -0.844775000 |
| 1  | 3.899336000  | -3.684965000 | 0.383123000  |
| 1  | 2.476056000  | -3.181853000 | -0.544021000 |
| 1  | 4.802292000  | -2.230289000 | 2.243349000  |
| 1  | 5.122940000  | -0.987988000 | 1.038681000  |
| 1  | 4.177156000  | -0.598143000 | 2.492901000  |
| 6  | 3.260216000  | 0.877152000  | -0.526206000 |
| 6  | 4.187540000  | 0.151869000  | -1.510701000 |
| 6  | 2.402968000  | 1.864925000  | -1.326135000 |
| 6  | 4.082682000  | 1.705750000  | 0.473766000  |
| 1  | 4.934694000  | -0.466362000 | -1.007713000 |
| 1  | 3.623870000  | -0.481527000 | -2.202867000 |
| 1  | 4.731357000  | 0.892633000  | -2.109806000 |
| 1  | 1.722325000  | 2.396030000  | -0.658255000 |
| 1  | 3.051096000  | 2.609948000  | -1.804547000 |
| 1  | 1.810306000  | 1.366631000  | -2.096317000 |
| 1  | 4.709135000  | 2.416739000  | -0.079657000 |
| 1  | 3.429351000  | 2.286686000  | 1.132266000  |
| 1  | 4.746139000  | 1.104320000  | 1.095689000  |
| 1  | -0.162575000 | 2.379424000  | 0.611299000  |
| 1  | 2.011189000  | 0.949659000  | 2.488903000  |
| 1  | 0.366630000  | -2.479886000 | -0.202108000 |
| 1  | -0.375052000 | 0.636861000  | -1.435616000 |
| 7  | -0.889001000 | 2.459884000  | -0.105347000 |

|   |              |             |              |
|---|--------------|-------------|--------------|
| 6 | -2.225072000 | 2.460292000 | 0.517886000  |
| 1 | -2.175434000 | 1.830602000 | 1.407813000  |
| 1 | -2.482240000 | 3.475471000 | 0.849677000  |
| 6 | -3.288250000 | 1.921311000 | -0.435468000 |
| 1 | -3.398679000 | 2.592445000 | -1.295594000 |
| 1 | -2.946035000 | 0.960229000 | -0.832093000 |
| 6 | -4.633702000 | 1.748303000 | 0.261153000  |
| 1 | -5.382627000 | 1.348034000 | -0.428188000 |
| 1 | -4.545775000 | 1.054853000 | 1.104225000  |
| 1 | -5.011117000 | 2.700613000 | 0.650312000  |
| 6 | -0.614015000 | 3.606631000 | -0.988717000 |
| 1 | 0.043646000  | 3.260045000 | -1.793459000 |
| 1 | -1.555075000 | 3.905930000 | -1.459125000 |
| 6 | 0.017724000  | 4.785884000 | -0.256532000 |
| 1 | 0.933525000  | 4.443507000 | 0.242605000  |
| 1 | -0.660929000 | 5.132995000 | 0.532147000  |
| 6 | 0.350455000  | 5.934258000 | -1.204316000 |
| 1 | 0.803483000  | 6.771142000 | -0.665535000 |
| 1 | 1.057607000  | 5.612763000 | -1.976248000 |
| 1 | -0.547715000 | 6.308378000 | -1.707282000 |
| 1 | -0.642241000 | 1.362425000 | -0.786646000 |

### TSB2-6

| -----                   |              |              |              |
|-------------------------|--------------|--------------|--------------|
| Coordinates (Angstroms) |              |              |              |
|                         | X            | Y            | Z            |
| -----                   |              |              |              |
| 44                      | 0.670268000  | -0.844885000 | -0.311653000 |
| 6                       | -2.044529000 | -0.135353000 | -1.360744000 |
| 6                       | -3.337265000 | -0.265486000 | -1.870353000 |
| 6                       | -3.944762000 | -1.510568000 | -1.895950000 |
| 6                       | -3.244903000 | -2.614676000 | -1.417124000 |
| 6                       | -1.956516000 | -2.423002000 | -0.946850000 |
| 7                       | -1.363245000 | -1.219096000 | -0.917739000 |
| 1                       | -4.950824000 | -1.619284000 | -2.287540000 |
| 1                       | -3.866261000 | 0.604475000  | -2.238059000 |
| 1                       | -3.678786000 | -3.607864000 | -1.419768000 |
| 1                       | -1.356028000 | -3.248762000 | -0.582329000 |
| 6                       | -1.347804000 | 1.170547000  | -1.237354000 |
| 6                       | -1.945842000 | 2.378452000  | -1.547967000 |
| 6                       | -1.167505000 | 3.547522000  | -1.364978000 |
| 6                       | 0.125280000  | 3.466482000  | -0.937200000 |
| 6                       | 0.732288000  | 2.186110000  | -0.659629000 |
| 7                       | -0.092848000 | 1.079305000  | -0.762933000 |
| 1                       | -1.606264000 | 4.518887000  | -1.576863000 |

|    |              |              |              |
|----|--------------|--------------|--------------|
| 1  | -2.959358000 | 2.442463000  | -1.920522000 |
| 1  | 0.725322000  | 4.361819000  | -0.810906000 |
| 6  | 2.055035000  | 2.014384000  | -0.300342000 |
| 1  | 2.691306000  | 2.887418000  | -0.192473000 |
| 15 | 2.636856000  | 0.369853000  | 0.062770000  |
| 6  | 1.382668000  | -2.541092000 | -0.091555000 |
| 8  | 1.830631000  | -3.613086000 | -0.001682000 |
| 6  | 3.255830000  | 0.394347000  | 1.867158000  |
| 6  | 2.211392000  | 1.171335000  | 2.684330000  |
| 6  | 3.294719000  | -1.044836000 | 2.406186000  |
| 6  | 4.613670000  | 1.073900000  | 2.082984000  |
| 1  | 2.155135000  | 2.221100000  | 2.383203000  |
| 1  | 1.231622000  | 0.703602000  | 2.567591000  |
| 1  | 2.490467000  | 1.131882000  | 3.745850000  |
| 1  | 3.958758000  | -1.696870000 | 1.832670000  |
| 1  | 3.657741000  | -1.035672000 | 3.442513000  |
| 1  | 2.290874000  | -1.477515000 | 2.399090000  |
| 1  | 4.807591000  | 1.140528000  | 3.161272000  |
| 1  | 5.446343000  | 0.520820000  | 1.641732000  |
| 1  | 4.624989000  | 2.095275000  | 1.688418000  |
| 6  | 4.115854000  | 0.066682000  | -1.096448000 |
| 6  | 4.894739000  | -1.189799000 | -0.683856000 |
| 6  | 3.564556000  | -0.158440000 | -2.514112000 |
| 6  | 5.057454000  | 1.280585000  | -1.174150000 |
| 1  | 5.432081000  | -1.063142000 | 0.259729000  |
| 1  | 4.232636000  | -2.056456000 | -0.588566000 |
| 1  | 5.639954000  | -1.426940000 | -1.453433000 |
| 1  | 2.874463000  | 0.637739000  | -2.810217000 |
| 1  | 4.400604000  | -0.167596000 | -3.225352000 |
| 1  | 3.034187000  | -1.108793000 | -2.595633000 |
| 1  | 5.850892000  | 1.071560000  | -1.902599000 |
| 1  | 4.522014000  | 2.170011000  | -1.519676000 |
| 1  | 5.543510000  | 1.518001000  | -0.228252000 |
| 6  | -1.138625000 | 0.050918000  | 2.152850000  |
| 6  | -2.430527000 | -0.597545000 | 1.881466000  |
| 8  | -0.107090000 | -0.750502000 | 1.839985000  |
| 1  | -2.411524000 | -1.674058000 | 2.051110000  |
| 1  | 1.099231000  | -0.912206000 | -1.835523000 |
| 6  | -3.646678000 | -0.032100000 | 1.446631000  |
| 6  | -3.776023000 | 1.349651000  | 1.155861000  |
| 6  | -4.781494000 | -0.872899000 | 1.331337000  |
| 6  | -5.007445000 | 1.865170000  | 0.797227000  |
| 1  | -2.907209000 | 1.996043000  | 1.193745000  |
| 6  | -6.007464000 | -0.347271000 | 0.968408000  |

|   |              |              |             |
|---|--------------|--------------|-------------|
| 1 | -4.672704000 | -1.933464000 | 1.537004000 |
| 6 | -6.116967000 | 1.020033000  | 0.704039000 |
| 1 | -5.109286000 | 2.921588000  | 0.574774000 |
| 1 | -6.876800000 | -0.990043000 | 0.885284000 |
| 1 | -7.078035000 | 1.432711000  | 0.412798000 |
| 1 | -1.099575000 | 1.064692000  | 1.704540000 |
| 1 | -1.232190000 | 0.274125000  | 3.256663000 |

**TSB8-9**

Coordinates (Angstroms)

|   | X            | Y            | Z            |
|---|--------------|--------------|--------------|
| 7 | 2.577859000  | -0.035786000 | -0.435017000 |
| 6 | 3.604346000  | 0.911007000  | 0.043434000  |
| 1 | 3.615039000  | 1.777582000  | -0.623719000 |
| 1 | 4.588904000  | 0.436614000  | -0.042188000 |
| 6 | 3.034834000  | -1.436405000 | -0.493242000 |
| 1 | 4.047352000  | -1.447911000 | -0.918817000 |
| 1 | 3.115606000  | -1.838264000 | 0.524574000  |
| 6 | -1.634652000 | 0.610618000  | -1.757535000 |
| 1 | -1.725490000 | 0.244294000  | -2.785207000 |
| 1 | -1.624090000 | 1.703084000  | -1.820275000 |
| 6 | -0.234258000 | 0.096906000  | -1.313223000 |
| 8 | 0.721164000  | 0.451272000  | -2.162641000 |
| 1 | -0.345546000 | -1.000057000 | -1.170091000 |
| 7 | 0.141968000  | 0.554787000  | 0.149588000  |
| 1 | 1.456995000  | 0.199723000  | 0.067626000  |
| 6 | -0.048916000 | 2.003069000  | 0.373524000  |
| 1 | -1.126210000 | 2.222794000  | 0.374574000  |
| 1 | 0.298193000  | 2.221917000  | 1.392399000  |
| 6 | -0.483628000 | -0.161004000 | 1.284109000  |
| 1 | -1.561510000 | 0.035802000  | 1.316126000  |
| 1 | -0.058284000 | 0.281446000  | 2.195333000  |
| 1 | 2.124433000  | 0.228911000  | -1.368379000 |
| 6 | -0.242177000 | -1.664420000 | 1.347601000  |
| 1 | 0.833918000  | -1.870355000 | 1.298129000  |
| 1 | -0.705624000 | -2.164034000 | 0.492514000  |
| 6 | -0.820014000 | -2.245811000 | 2.635285000  |
| 1 | -0.651995000 | -3.325216000 | 2.690286000  |
| 1 | -0.361363000 | -1.790746000 | 3.520338000  |
| 1 | -1.899848000 | -2.071486000 | 2.690491000  |
| 6 | 0.657763000  | 2.947863000  | -0.594730000 |
| 1 | 1.741061000  | 2.837807000  | -0.486765000 |
| 1 | 0.435452000  | 2.666097000  | -1.624563000 |

|   |              |              |              |
|---|--------------|--------------|--------------|
| 6 | 0.264594000  | 4.394454000  | -0.307794000 |
| 1 | 0.485237000  | 4.674869000  | 0.729170000  |
| 1 | 0.805849000  | 5.085259000  | -0.960702000 |
| 1 | -0.807046000 | 4.554518000  | -0.472682000 |
| 6 | 3.382621000  | 1.373017000  | 1.484176000  |
| 1 | 4.225720000  | 2.016018000  | 1.762100000  |
| 1 | 2.488659000  | 2.004910000  | 1.527751000  |
| 6 | 3.245692000  | 0.236813000  | 2.493659000  |
| 1 | 4.129208000  | -0.411124000 | 2.492930000  |
| 1 | 3.122454000  | 0.631288000  | 3.506560000  |
| 1 | 2.371731000  | -0.386646000 | 2.276981000  |
| 6 | 2.142075000  | -2.328238000 | -1.350504000 |
| 1 | 1.951281000  | -1.827687000 | -2.304849000 |
| 1 | 1.167884000  | -2.450325000 | -0.871128000 |
| 6 | 2.776685000  | -3.698696000 | -1.565550000 |
| 1 | 2.130676000  | -4.337583000 | -2.174396000 |
| 1 | 3.740412000  | -3.615234000 | -2.079802000 |
| 1 | 2.950260000  | -4.213000000 | -0.613434000 |
| 6 | -2.803400000 | 0.134130000  | -0.935459000 |
| 6 | -3.090044000 | -1.233162000 | -0.838777000 |
| 6 | -3.599790000 | 1.023252000  | -0.207993000 |
| 6 | -4.104999000 | -1.697946000 | -0.008894000 |
| 1 | -2.501815000 | -1.940935000 | -1.417165000 |
| 6 | -4.621826000 | 0.564996000  | 0.619335000  |
| 1 | -3.408837000 | 2.090894000  | -0.285547000 |
| 6 | -4.870301000 | -0.799947000 | 0.732383000  |
| 1 | -4.301037000 | -2.764022000 | 0.059109000  |
| 1 | -5.222799000 | 1.275283000  | 1.179525000  |
| 1 | -5.660569000 | -1.160626000 | 1.383499000  |

### TSC7-13

| -----                   |              |              |              |
|-------------------------|--------------|--------------|--------------|
| Coordinates (Angstroms) |              |              |              |
|                         | X            | Y            | Z            |
| -----                   |              |              |              |
| 44                      | -0.165399000 | -1.096351000 | -0.901772000 |
| 6                       | 0.450199000  | -3.217012000 | 1.116297000  |
| 6                       | 0.993497000  | -4.351489000 | 1.716578000  |
| 6                       | 2.026062000  | -5.032486000 | 1.087678000  |
| 6                       | 2.494304000  | -4.564314000 | -0.132872000 |
| 6                       | 1.896083000  | -3.440358000 | -0.683219000 |
| 7                       | 0.899019000  | -2.782647000 | -0.083099000 |
| 1                       | 2.458258000  | -5.915362000 | 1.546633000  |
| 1                       | 0.612820000  | -4.703207000 | 2.667580000  |
| 1                       | 3.303715000  | -5.057299000 | -0.658531000 |

|    |              |              |              |
|----|--------------|--------------|--------------|
| 1  | 2.216865000  | -3.044253000 | -1.639730000 |
| 6  | -0.617974000 | -2.402728000 | 1.754224000  |
| 6  | -1.107112000 | -2.620832000 | 3.034171000  |
| 6  | -2.078540000 | -1.741396000 | 3.524786000  |
| 6  | -2.478954000 | -0.657599000 | 2.772168000  |
| 6  | -1.910140000 | -0.445565000 | 1.498380000  |
| 7  | -1.056442000 | -1.374527000 | 1.009446000  |
| 1  | -2.503399000 | -1.904475000 | 4.510481000  |
| 1  | -0.754639000 | -3.441925000 | 3.645026000  |
| 1  | -3.205154000 | 0.052332000  | 3.152930000  |
| 6  | -2.091846000 | 0.762668000  | 0.701690000  |
| 15 | -2.029049000 | 0.331228000  | -1.068230000 |
| 6  | 0.619444000  | -0.876329000 | -2.564519000 |
| 8  | 1.103162000  | -0.793736000 | -3.619428000 |
| 6  | -2.079938000 | 1.951637000  | -2.072647000 |
| 6  | -1.324401000 | 3.025105000  | -1.286888000 |
| 6  | -1.343110000 | 1.708080000  | -3.399823000 |
| 6  | -3.469314000 | 2.531216000  | -2.370080000 |
| 1  | -1.858043000 | 3.313779000  | -0.376925000 |
| 1  | -0.330872000 | 2.684054000  | -1.015654000 |
| 1  | -1.209134000 | 3.920271000  | -1.910199000 |
| 1  | -1.749591000 | 0.859762000  | -3.956742000 |
| 1  | -1.430270000 | 2.598774000  | -4.033722000 |
| 1  | -0.280548000 | 1.519119000  | -3.235035000 |
| 1  | -3.335066000 | 3.506446000  | -2.854070000 |
| 1  | -4.054291000 | 1.915764000  | -3.055354000 |
| 1  | -4.049741000 | 2.697836000  | -1.458923000 |
| 6  | -3.646838000 | -0.639096000 | -1.452386000 |
| 6  | -3.668649000 | -0.994966000 | -2.945906000 |
| 6  | -3.677429000 | -1.956907000 | -0.651034000 |
| 6  | -4.933174000 | 0.108442000  | -1.048612000 |
| 1  | -3.746306000 | -0.113959000 | -3.588794000 |
| 1  | -2.767532000 | -1.549023000 | -3.229114000 |
| 1  | -4.536771000 | -1.629793000 | -3.162040000 |
| 1  | -3.801591000 | -1.779319000 | 0.420503000  |
| 1  | -4.546820000 | -2.536409000 | -0.985309000 |
| 1  | -2.785757000 | -2.563999000 | -0.803930000 |
| 1  | -5.758095000 | -0.612133000 | -1.004738000 |
| 1  | -4.845491000 | 0.556430000  | -0.053056000 |
| 1  | -5.230685000 | 0.883654000  | -1.751490000 |
| 6  | 1.546065000  | 1.196930000  | 0.713116000  |
| 8  | 1.292728000  | -0.091574000 | 0.526056000  |
| 1  | -1.088336000 | -2.151650000 | -1.655195000 |
| 1  | -2.936387000 | 1.373876000  | 1.032641000  |

|   |              |              |              |
|---|--------------|--------------|--------------|
| 1 | 2.392603000  | 1.357379000  | 1.414859000  |
| 7 | 0.344315000  | 1.856166000  | 1.478734000  |
| 1 | -0.797741000 | 1.428812000  | 0.986076000  |
| 6 | 0.376217000  | 3.327535000  | 1.578959000  |
| 1 | 0.371194000  | 3.738608000  | 0.570539000  |
| 1 | 1.317312000  | 3.651495000  | 2.044345000  |
| 6 | -0.816552000 | 3.919654000  | 2.329310000  |
| 1 | -0.763465000 | 3.676357000  | 3.395887000  |
| 1 | -1.739684000 | 3.467164000  | 1.949326000  |
| 6 | -0.873193000 | 5.435294000  | 2.155844000  |
| 1 | -0.992052000 | 5.706794000  | 1.101112000  |
| 1 | -1.713306000 | 5.866041000  | 2.708177000  |
| 1 | 0.044040000  | 5.910331000  | 2.521041000  |
| 6 | 0.289883000  | 1.220541000  | 2.822347000  |
| 1 | 0.419084000  | 0.153557000  | 2.634756000  |
| 1 | -0.718404000 | 1.368830000  | 3.221132000  |
| 6 | 1.310934000  | 1.675939000  | 3.864298000  |
| 1 | 2.327850000  | 1.573854000  | 3.472531000  |
| 1 | 1.171825000  | 2.733456000  | 4.115850000  |
| 6 | 1.939076000  | 1.935396000  | -0.586903000 |
| 1 | 1.243096000  | 1.604251000  | -1.365002000 |
| 1 | 1.879308000  | 3.024153000  | -0.506099000 |
| 6 | 3.349584000  | 1.573763000  | -0.997997000 |
| 6 | 3.716396000  | 0.240766000  | -1.220456000 |
| 6 | 4.321367000  | 2.564249000  | -1.159633000 |
| 6 | 5.014142000  | -0.084525000 | -1.599275000 |
| 1 | 2.968272000  | -0.527631000 | -1.060954000 |
| 6 | 5.622887000  | 2.240992000  | -1.539299000 |
| 1 | 4.057728000  | 3.605396000  | -0.987355000 |
| 6 | 5.973744000  | 0.913193000  | -1.762765000 |
| 1 | 5.278601000  | -1.124984000 | -1.767889000 |
| 1 | 6.362374000  | 3.027864000  | -1.658453000 |
| 1 | 6.986754000  | 0.657275000  | -2.059493000 |
| 6 | 1.170245000  | 0.833736000  | 5.131223000  |
| 1 | 1.327948000  | -0.228531000 | 4.916042000  |
| 1 | 1.898821000  | 1.135268000  | 5.889371000  |
| 1 | 0.170870000  | 0.938358000  | 5.569233000  |

**TSD7-8**

Coordinates (Angstroms)

|    | X            | Y            | Z            |
|----|--------------|--------------|--------------|
| 44 | -1.391930000 | 0.227046000  | -0.918475000 |
| 6  | -3.556051000 | -1.768191000 | -0.362899000 |



|    |              |              |              |
|----|--------------|--------------|--------------|
| 6  | -4.563689000 | -2.706147000 | -0.575741000 |
| 6  | -4.632055000 | -3.373617000 | -1.790006000 |
| 6  | -3.683517000 | -3.089733000 | -2.764697000 |
| 6  | -2.716808000 | -2.133194000 | -2.493539000 |
| 7  | -2.648012000 | -1.478832000 | -1.327032000 |
| 1  | -5.411898000 | -4.105997000 | -1.969118000 |
| 1  | -5.291376000 | -2.909344000 | 0.200693000  |
| 1  | -3.689996000 | -3.589285000 | -3.726281000 |
| 1  | -1.968577000 | -1.865920000 | -3.230182000 |
| 6  | -3.356997000 | -1.077448000 | 0.934646000  |
| 6  | -3.986266000 | -1.424845000 | 2.123801000  |
| 6  | -3.549398000 | -0.811368000 | 3.299584000  |
| 6  | -2.484968000 | 0.073275000  | 3.275114000  |
| 6  | -1.882796000 | 0.386463000  | 2.046211000  |
| 7  | -2.393017000 | -0.146233000 | 0.913373000  |
| 1  | -4.026591000 | -1.057952000 | 4.242896000  |
| 1  | -4.766562000 | -2.174668000 | 2.152873000  |
| 1  | -2.099825000 | 0.512703000  | 4.188207000  |
| 6  | -0.634498000 | 1.128983000  | 1.862511000  |
| 15 | -0.667043000 | 2.099818000  | 0.311634000  |
| 6  | -0.576282000 | 0.505396000  | -2.558444000 |
| 8  | -0.116752000 | 0.665771000  | -3.615133000 |
| 6  | 1.077550000  | 2.865055000  | 0.157328000  |
| 6  | 2.089030000  | 2.002578000  | 0.933034000  |
| 6  | 1.444778000  | 2.877595000  | -1.335044000 |
| 6  | 1.236678000  | 4.291884000  | 0.703298000  |
| 1  | 1.963201000  | 2.115287000  | 2.013874000  |
| 1  | 2.030214000  | 0.941760000  | 0.703115000  |
| 1  | 3.099145000  | 2.349583000  | 0.681895000  |
| 1  | 0.713919000  | 3.430723000  | -1.933249000 |
| 1  | 2.420159000  | 3.360843000  | -1.471396000 |
| 1  | 1.511061000  | 1.869727000  | -1.747847000 |
| 1  | 2.287896000  | 4.582855000  | 0.587500000  |
| 1  | 0.641796000  | 5.028290000  | 0.159968000  |
| 1  | 0.998744000  | 4.357178000  | 1.767799000  |
| 6  | -1.961970000 | 3.490724000  | 0.458123000  |
| 6  | -1.969883000 | 4.273424000  | -0.864002000 |
| 6  | -3.357539000 | 2.864642000  | 0.645299000  |
| 6  | -1.752613000 | 4.425821000  | 1.663303000  |
| 1  | -1.024015000 | 4.787105000  | -1.058075000 |
| 1  | -2.176658000 | 3.605561000  | -1.706835000 |
| 1  | -2.756204000 | 5.037245000  | -0.835529000 |
| 1  | -3.463871000 | 2.390965000  | 1.625431000  |
| 1  | -4.101821000 | 3.668410000  | 0.591232000  |

|   |              |              |              |
|---|--------------|--------------|--------------|
| 1 | -3.589531000 | 2.130316000  | -0.126446000 |
| 1 | -2.682166000 | 4.977417000  | 1.846698000  |
| 1 | -1.526653000 | 3.863822000  | 2.576482000  |
| 1 | -0.970217000 | 5.166967000  | 1.511033000  |
| 6 | 4.714604000  | 0.986221000  | -1.529892000 |
| 8 | 5.117138000  | 1.267356000  | -2.634253000 |
| 1 | -0.256050000 | 1.605062000  | 2.767922000  |
| 1 | 3.640262000  | 0.786675000  | -1.345300000 |
| 6 | 5.597111000  | 0.878570000  | -0.302544000 |
| 1 | 6.642242000  | 0.877957000  | -0.626089000 |
| 1 | 5.431628000  | 1.785264000  | 0.293272000  |
| 6 | 5.248391000  | -0.344901000 | 0.512372000  |
| 6 | 5.469871000  | -1.618135000 | -0.020989000 |
| 6 | 4.659022000  | -0.237656000 | 1.772996000  |
| 6 | 5.108796000  | -2.758814000 | 0.689660000  |
| 1 | 5.928701000  | -1.715193000 | -1.002079000 |
| 6 | 4.302497000  | -1.377036000 | 2.489683000  |
| 1 | 4.478204000  | 0.745413000  | 2.198854000  |
| 6 | 4.525330000  | -2.640179000 | 1.948971000  |
| 1 | 5.281240000  | -3.739839000 | 0.257898000  |
| 1 | 3.842496000  | -1.276532000 | 3.467708000  |
| 1 | 4.240155000  | -3.528567000 | 2.503922000  |
| 1 | -2.610634000 | 1.083505000  | -1.553408000 |
| 7 | 0.244024000  | -0.900231000 | 0.272416000  |
| 1 | 0.073708000  | 0.157341000  | 1.302410000  |
| 6 | 1.472932000  | -1.048601000 | -0.503776000 |
| 1 | 1.667333000  | -0.091331000 | -0.996627000 |
| 6 | -0.126591000 | -2.159854000 | 0.906689000  |
| 1 | -1.041585000 | -2.008541000 | 1.487273000  |
| 1 | 2.351529000  | -1.248531000 | 0.136797000  |
| 1 | -0.377763000 | -2.936842000 | 0.161816000  |
| 6 | 1.445373000  | -2.119378000 | -1.602369000 |
| 1 | 1.478215000  | -3.120863000 | -1.155686000 |
| 1 | 0.491169000  | -2.044304000 | -2.139066000 |
| 6 | 2.607243000  | -1.959980000 | -2.579012000 |
| 1 | 3.568262000  | -2.014474000 | -2.055452000 |
| 1 | 2.601516000  | -2.741742000 | -3.345637000 |
| 1 | 2.559950000  | -0.992368000 | -3.091056000 |
| 6 | 0.914264000  | -2.733876000 | 1.875579000  |
| 1 | 1.821598000  | -3.025036000 | 1.335459000  |
| 1 | 1.214362000  | -1.941581000 | 2.573633000  |
| 6 | 0.375791000  | -3.936473000 | 2.645870000  |
| 1 | -0.505514000 | -3.664306000 | 3.239329000  |
| 1 | 0.076845000  | -4.740237000 | 1.962850000  |

1 1.124412000 -4.346987000 3.332001000  
-----

**TSD8-13**  
-----

Coordinates (Angstroms)

|    | X            | Y            | Z            |
|----|--------------|--------------|--------------|
| 44 | -1.268142000 | 0.659896000  | 0.125956000  |
| 6  | 0.061315000  | 2.769390000  | -1.558550000 |
| 6  | 0.412746000  | 4.011499000  | -2.081114000 |
| 6  | 0.084399000  | 5.164985000  | -1.381887000 |
| 6  | -0.584093000 | 5.046650000  | -0.171212000 |
| 6  | -0.905632000 | 3.777285000  | 0.288054000  |
| 7  | -0.596529000 | 2.662449000  | -0.382920000 |
| 1  | 0.350573000  | 6.138581000  | -1.778786000 |
| 1  | 0.936039000  | 4.084219000  | -3.026170000 |
| 1  | -0.858193000 | 5.916090000  | 0.414550000  |
| 1  | -1.426034000 | 3.635324000  | 1.227578000  |
| 6  | 0.379145000  | 1.492696000  | -2.247448000 |
| 6  | 1.101394000  | 1.407395000  | -3.432964000 |
| 6  | 1.333824000  | 0.153884000  | -3.986445000 |
| 6  | 0.825309000  | -0.975938000 | -3.362065000 |
| 6  | 0.103935000  | -0.831171000 | -2.179229000 |
| 7  | -0.079973000 | 0.383892000  | -1.635739000 |
| 1  | 1.898038000  | 0.062522000  | -4.908349000 |
| 1  | 1.481159000  | 2.295491000  | -3.921448000 |
| 1  | 0.977095000  | -1.963684000 | -3.781770000 |
| 6  | -0.500369000 | -2.006100000 | -1.462090000 |
| 15 | -1.954023000 | -1.497164000 | -0.420257000 |
| 6  | -2.522201000 | 0.870640000  | 1.476248000  |
| 8  | -3.383119000 | 0.968913000  | 2.249252000  |
| 6  | -2.145662000 | -2.910173000 | 0.824275000  |
| 6  | -1.223896000 | -2.578846000 | 2.001917000  |
| 6  | -3.578653000 | -2.961661000 | 1.377386000  |
| 6  | -1.742918000 | -4.281409000 | 0.258632000  |
| 1  | -0.181006000 | -2.398926000 | 1.735988000  |
| 1  | -1.581743000 | -1.693362000 | 2.528959000  |
| 1  | -1.234846000 | -3.414867000 | 2.711358000  |
| 1  | -4.312999000 | -3.321903000 | 0.654332000  |
| 1  | -3.595187000 | -3.653607000 | 2.227163000  |
| 1  | -3.903653000 | -1.985088000 | 1.749960000  |
| 1  | -1.909953000 | -5.040373000 | 1.031832000  |
| 1  | -2.315605000 | -4.580008000 | -0.620966000 |
| 1  | -0.678968000 | -4.317614000 | 0.006171000  |
| 6  | -3.394913000 | -1.558036000 | -1.668684000 |

|   |              |              |              |
|---|--------------|--------------|--------------|
| 6 | -4.637162000 | -0.879794000 | -1.068447000 |
| 6 | -2.994043000 | -0.778555000 | -2.935658000 |
| 6 | -3.751089000 | -2.983326000 | -2.119630000 |
| 1 | -5.020152000 | -1.397599000 | -0.187418000 |
| 1 | -4.427059000 | 0.156855000  | -0.793038000 |
| 1 | -5.436765000 | -0.873879000 | -1.818659000 |
| 1 | -2.182414000 | -1.265914000 | -3.484498000 |
| 1 | -3.858200000 | -0.742978000 | -3.609098000 |
| 1 | -2.702461000 | 0.250169000  | -2.714002000 |
| 1 | -4.515190000 | -2.923031000 | -2.903614000 |
| 1 | -2.892553000 | -3.508779000 | -2.550120000 |
| 1 | -4.164897000 | -3.596973000 | -1.318431000 |
| 6 | 2.122025000  | -1.011286000 | 1.967358000  |
| 8 | 1.737295000  | -1.825970000 | 2.819523000  |
| 1 | -0.737944000 | -2.808130000 | -2.166753000 |
| 1 | 2.832903000  | -0.214456000 | 2.266673000  |
| 6 | 2.303038000  | -1.481578000 | 0.518178000  |
| 1 | 1.756005000  | -2.427621000 | 0.447840000  |
| 1 | 1.872200000  | -0.772145000 | -0.186496000 |
| 6 | 3.754069000  | -1.731432000 | 0.182563000  |
| 6 | 4.548655000  | -2.524546000 | 1.018273000  |
| 6 | 4.337461000  | -1.175873000 | -0.959287000 |
| 6 | 5.884734000  | -2.762420000 | 0.714385000  |
| 1 | 4.104294000  | -2.947950000 | 1.914860000  |
| 6 | 5.675676000  | -1.412244000 | -1.266983000 |
| 1 | 3.732827000  | -0.549221000 | -1.611294000 |
| 6 | 6.453878000  | -2.207880000 | -0.431232000 |
| 1 | 6.486183000  | -3.381102000 | 1.374230000  |
| 1 | 6.111805000  | -0.970665000 | -2.158719000 |
| 1 | 7.497951000  | -2.391895000 | -0.666422000 |
| 1 | -2.454682000 | 1.042147000  | -0.856577000 |
| 7 | 0.695655000  | 0.572559000  | 1.716305000  |
| 6 | 0.185903000  | 0.570960000  | 3.089901000  |
| 1 | -0.556527000 | -0.223925000 | 3.182378000  |
| 6 | 1.584623000  | 1.728197000  | 1.605426000  |
| 1 | 1.022054000  | 2.675849000  | 1.589210000  |
| 1 | 0.994559000  | 0.286274000  | 3.788739000  |
| 1 | 2.216116000  | 1.800920000  | 2.514985000  |
| 6 | -0.426178000 | 1.868204000  | 3.642548000  |
| 1 | 0.352438000  | 2.627536000  | 3.781063000  |
| 1 | -1.139148000 | 2.287683000  | 2.924469000  |
| 6 | -1.130468000 | 1.626155000  | 4.974895000  |
| 1 | -0.437631000 | 1.204258000  | 5.712076000  |
| 1 | -1.538874000 | 2.552193000  | 5.393650000  |

|   |              |              |              |
|---|--------------|--------------|--------------|
| 1 | -1.958738000 | 0.918917000  | 4.857523000  |
| 6 | 2.540914000  | 1.748222000  | 0.411636000  |
| 1 | 3.339663000  | 1.013522000  | 0.549817000  |
| 1 | 2.016107000  | 1.448702000  | -0.496963000 |
| 6 | 3.168640000  | 3.125779000  | 0.218338000  |
| 1 | 2.405442000  | 3.889186000  | 0.026898000  |
| 1 | 3.720377000  | 3.433479000  | 1.114171000  |
| 1 | 3.873010000  | 3.134100000  | -0.620348000 |
| 1 | 0.239277000  | -2.400167000 | -0.761009000 |

### **tBuOK**

| Coordinates (Angstroms) |              |              |              |
|-------------------------|--------------|--------------|--------------|
|                         | X            | Y            | Z            |
| 6                       | -1.068029000 | -0.000140000 | 0.006649000  |
| 8                       | 0.287719000  | -0.001534000 | 0.111619000  |
| 6                       | -1.501539000 | 0.004019000  | -1.480619000 |
| 1                       | -1.093527000 | -0.881296000 | -1.983228000 |
| 1                       | -2.590857000 | 0.006161000  | -1.622662000 |
| 1                       | -1.090563000 | 0.890459000  | -1.978797000 |
| 6                       | -1.672858000 | -1.255934000 | 0.680723000  |
| 1                       | -2.767850000 | -1.307480000 | 0.610904000  |
| 1                       | -1.257554000 | -2.156874000 | 0.213224000  |
| 1                       | -1.396097000 | -1.273537000 | 1.741709000  |
| 6                       | -1.670644000 | 1.253440000  | 0.686831000  |
| 1                       | -1.392039000 | 1.266579000  | 1.747342000  |
| 1                       | -1.255945000 | 2.156412000  | 0.222719000  |
| 1                       | -2.765768000 | 1.305798000  | 0.619490000  |
| 19                      | 2.567730000  | -0.000119000 | 0.009202000  |

### **C<sub>8</sub>H<sub>8</sub>O**

| Coordinates (Angstroms) |              |              |              |
|-------------------------|--------------|--------------|--------------|
|                         | X            | Y            | Z            |
| 6                       | -2.566803000 | 0.009782000  | -0.745747000 |
| 6                       | -1.602456000 | 0.582057000  | 0.205045000  |
| 8                       | -2.479163000 | -0.471146000 | 0.589292000  |
| 1                       | -3.477635000 | 0.555549000  | -0.988633000 |
| 1                       | -2.203511000 | -0.673140000 | -1.512826000 |
| 1                       | -1.843817000 | 1.549967000  | 0.645375000  |
| 6                       | -0.146992000 | 0.266370000  | 0.122533000  |
| 6                       | 0.785384000  | 1.302473000  | 0.057089000  |
| 6                       | 0.296148000  | -1.056877000 | 0.086420000  |
| 6                       | 2.143219000  | 1.020649000  | -0.058528000 |

|   |              |              |              |
|---|--------------|--------------|--------------|
| 1 | 0.446839000  | 2.334672000  | 0.098356000  |
| 6 | 1.653409000  | -1.337683000 | -0.026018000 |
| 1 | -0.432450000 | -1.858123000 | 0.161318000  |
| 6 | 2.580214000  | -0.300531000 | -0.102330000 |
| 1 | 2.861701000  | 1.833020000  | -0.108155000 |
| 1 | 1.989845000  | -2.369736000 | -0.050652000 |
| 1 | 3.639596000  | -0.520478000 | -0.189906000 |

**NH(CH<sub>3</sub>CH<sub>3</sub>CH<sub>3</sub>)<sub>2</sub>**

Coordinates (Angstroms)

|   | X            | Y            | Z            |
|---|--------------|--------------|--------------|
| 7 | 0.000000000  | 0.437521000  | -0.059491000 |
| 1 | -0.000058000 | 1.102974000  | 0.709957000  |
| 6 | 1.214766000  | -0.359720000 | 0.016647000  |
| 1 | 1.219344000  | -1.052011000 | -0.836002000 |
| 1 | 1.252069000  | -0.991680000 | 0.925616000  |
| 6 | -1.214765000 | -0.359738000 | 0.016507000  |
| 1 | -1.219400000 | -1.051804000 | -0.836327000 |
| 1 | -1.252025000 | -0.991937000 | 0.925314000  |
| 6 | -2.460982000 | 0.516847000  | -0.041158000 |
| 1 | -2.444501000 | 1.224640000  | 0.798281000  |
| 1 | -2.422874000 | 1.117290000  | -0.956888000 |
| 6 | 2.460988000  | 0.516842000  | -0.041313000 |
| 1 | 2.444525000  | 1.224892000  | 0.797906000  |
| 1 | 2.422850000  | 1.116998000  | -0.957228000 |
| 6 | 3.749921000  | -0.298259000 | 0.004040000  |
| 1 | 3.799698000  | -1.005113000 | -0.831395000 |
| 1 | 4.631206000  | 0.347382000  | -0.053521000 |
| 1 | 3.822148000  | -0.876412000 | 0.931823000  |
| 6 | -3.749918000 | -0.298260000 | 0.003991000  |
| 1 | -4.631199000 | 0.347406000  | -0.053370000 |
| 1 | -3.799724000 | -1.004886000 | -0.831635000 |
| 1 | -3.822126000 | -0.876663000 | 0.931619000  |

**PhCH<sub>2</sub>CON(CH<sub>3</sub>CH<sub>3</sub>CH<sub>3</sub>)<sub>2</sub>**

Coordinates (Angstroms)

|   | X            | Y            | Z            |
|---|--------------|--------------|--------------|
| 6 | -0.515381000 | -0.352997000 | -1.352946000 |
| 8 | -0.760136000 | -1.378817000 | -1.983497000 |
| 7 | -1.353769000 | 0.116039000  | -0.388882000 |
| 6 | -2.565686000 | -0.642501000 | -0.101718000 |
| 1 | -2.919044000 | -1.089151000 | -1.033570000 |

|   |              |              |              |
|---|--------------|--------------|--------------|
| 1 | -3.330788000 | 0.062093000  | 0.244082000  |
| 6 | -1.093550000 | 1.293486000  | 0.428775000  |
| 1 | -1.513167000 | 1.103307000  | 1.423037000  |
| 1 | -0.018149000 | 1.412568000  | 0.579531000  |
| 6 | 0.781568000  | 0.409700000  | -1.610077000 |
| 1 | 0.633093000  | 1.492213000  | -1.585309000 |
| 1 | 1.078212000  | 0.140573000  | -2.626907000 |
| 6 | 1.871319000  | 0.011631000  | -0.632951000 |
| 6 | 2.625609000  | 0.979056000  | 0.033086000  |
| 6 | 2.139553000  | -1.338314000 | -0.388342000 |
| 6 | 3.628906000  | 0.608184000  | 0.925413000  |
| 1 | 2.427907000  | 2.032574000  | -0.149991000 |
| 6 | 3.139593000  | -1.709787000 | 0.502971000  |
| 1 | 1.554203000  | -2.095192000 | -0.902325000 |
| 6 | 3.887836000  | -0.737530000 | 1.163632000  |
| 1 | 4.206093000  | 1.373409000  | 1.435543000  |
| 1 | 3.335181000  | -2.762514000 | 0.682590000  |
| 1 | 4.667323000  | -1.028897000 | 1.860600000  |
| 6 | -1.695984000 | 2.575613000  | -0.146293000 |
| 1 | -2.775226000 | 2.437130000  | -0.280234000 |
| 1 | -1.280042000 | 2.748002000  | -1.146009000 |
| 6 | -1.427683000 | 3.782065000  | 0.747645000  |
| 1 | -1.852847000 | 4.694097000  | 0.319465000  |
| 1 | -1.867573000 | 3.645614000  | 1.741590000  |
| 1 | -0.352659000 | 3.946294000  | 0.881320000  |
| 6 | -2.337194000 | -1.734206000 | 0.943280000  |
| 1 | -1.928364000 | -1.283405000 | 1.856042000  |
| 1 | -1.576358000 | -2.421295000 | 0.558634000  |
| 6 | -3.618305000 | -2.495757000 | 1.267389000  |
| 1 | -3.436454000 | -3.278968000 | 2.008992000  |
| 1 | -4.387392000 | -1.827690000 | 1.671393000  |
| 1 | -4.030097000 | -2.974368000 | 0.372487000  |

## H<sub>2</sub>

| -----                   |             |             |              |
|-------------------------|-------------|-------------|--------------|
| Coordinates (Angstroms) |             |             |              |
|                         | X           | Y           | Z            |
| 1                       | 0.000000000 | 0.000000000 | 0.371384000  |
| 1                       | 0.000000000 | 0.000000000 | -0.371384000 |

## TSB3-5

| -----                   |   |   |   |
|-------------------------|---|---|---|
| Coordinates (Angstroms) |   |   |   |
|                         | X | Y | Z |
| -----                   |   |   |   |

|    |              |              |              |
|----|--------------|--------------|--------------|
| 6  | 3.522411000  | -0.241650000 | -0.785332000 |
| 6  | 4.731548000  | -0.873085000 | -1.089464000 |
| 6  | 4.917050000  | -1.444821000 | -2.336881000 |
| 6  | 3.892206000  | -1.366031000 | -3.276157000 |
| 6  | 2.716863000  | -0.732907000 | -2.910255000 |
| 7  | 2.521680000  | -0.204555000 | -1.692939000 |
| 1  | 5.852948000  | -1.938343000 | -2.577331000 |
| 1  | 5.518300000  | -0.920342000 | -0.347799000 |
| 1  | 3.998550000  | -1.781071000 | -4.271645000 |
| 1  | 1.889689000  | -0.636535000 | -3.605253000 |
| 6  | 3.256064000  | 0.414070000  | 0.519160000  |
| 6  | 4.212406000  | 0.534971000  | 1.503276000  |
| 6  | 3.836579000  | 1.196226000  | 2.696626000  |
| 6  | 2.577802000  | 1.695521000  | 2.848148000  |
| 6  | 1.603668000  | 1.569893000  | 1.792678000  |
| 7  | 2.001275000  | 0.892832000  | 0.656219000  |
| 1  | 4.564760000  | 1.308543000  | 3.495028000  |
| 1  | 5.213585000  | 0.144707000  | 1.382920000  |
| 1  | 2.289608000  | 2.214845000  | 3.756210000  |
| 6  | 0.325995000  | 2.098053000  | 1.861705000  |
| 15 | -0.673060000 | 2.061099000  | 0.400630000  |
| 6  | -0.404570000 | 0.682298000  | -2.483916000 |
| 8  | -1.099104000 | 0.637820000  | -3.424268000 |
| 6  | -0.831307000 | 3.857997000  | -0.215106000 |
| 6  | 0.559265000  | 4.504647000  | -0.100936000 |
| 6  | -1.271872000 | 3.897155000  | -1.685553000 |
| 6  | -1.803243000 | 4.700539000  | 0.622200000  |
| 1  | 0.865679000  | 4.614332000  | 0.942600000  |
| 1  | 1.327596000  | 3.923919000  | -0.618448000 |
| 1  | 0.524686000  | 5.502120000  | -0.556425000 |
| 1  | -2.235980000 | 3.408211000  | -1.848694000 |
| 1  | -1.378974000 | 4.942079000  | -2.003155000 |
| 1  | -0.531160000 | 3.424914000  | -2.335553000 |
| 1  | -1.678468000 | 5.758127000  | 0.359207000  |
| 1  | -2.846853000 | 4.442077000  | 0.425790000  |
| 1  | -1.614359000 | 4.606748000  | 1.696227000  |
| 6  | -2.369429000 | 1.395271000  | 0.914329000  |
| 6  | -3.323472000 | 1.415152000  | -0.296660000 |
| 6  | -2.121834000 | -0.049799000 | 1.399764000  |
| 6  | -3.036686000 | 2.119205000  | 2.096471000  |
| 1  | -3.806926000 | 2.391168000  | -0.406420000 |
| 1  | -2.798702000 | 1.231785000  | -1.241668000 |
| 1  | -4.101867000 | 0.649164000  | -0.181516000 |
| 1  | -1.775778000 | -0.046070000 | 2.438143000  |



|    |              |              |              |
|----|--------------|--------------|--------------|
| 1  | -3.051540000 | -0.629022000 | 1.323832000  |
| 1  | -1.353967000 | -0.563667000 | 0.818314000  |
| 1  | -3.877995000 | 1.505582000  | 2.441225000  |
| 1  | -2.346705000 | 2.231718000  | 2.939064000  |
| 1  | -3.437153000 | 3.099422000  | 1.840120000  |
| 1  | 0.027020000  | 2.654665000  | 2.744251000  |
| 6  | 0.650767000  | -2.564718000 | -0.134512000 |
| 6  | 0.895489000  | -3.272648000 | -1.382440000 |
| 1  | 0.951024000  | -2.688754000 | -2.296905000 |
| 1  | -0.123710000 | -3.322380000 | 0.217864000  |
| 8  | -0.034609000 | -1.472859000 | -0.500509000 |
| 1  | 0.748392000  | -4.347618000 | -1.473511000 |
| 6  | 1.677373000  | -2.527983000 | 0.972372000  |
| 6  | 1.340346000  | -1.858752000 | 2.148706000  |
| 6  | 2.908801000  | -3.173548000 | 0.860215000  |
| 6  | 2.236232000  | -1.835263000 | 3.210191000  |
| 1  | 0.388679000  | -1.340852000 | 2.219265000  |
| 6  | 3.798643000  | -3.158129000 | 1.929532000  |
| 1  | 3.180900000  | -3.667843000 | -0.069156000 |
| 6  | 3.461844000  | -2.490245000 | 3.104078000  |
| 1  | 1.981410000  | -1.298372000 | 4.117377000  |
| 1  | 4.760588000  | -3.653118000 | 1.839311000  |
| 1  | 4.161854000  | -2.468340000 | 3.933528000  |
| 1  | 1.253898000  | 2.088332000  | -1.490368000 |
| 44 | 0.689415000  | 0.713997000  | -0.995721000 |
| 19 | -2.550686000 | -1.449631000 | -1.497257000 |
| 8  | -4.488339000 | -1.799544000 | -0.212642000 |
| 6  | -5.620873000 | -2.178101000 | 0.442814000  |
| 6  | -6.664869000 | -2.750032000 | -0.547488000 |
| 6  | -5.308779000 | -3.269619000 | 1.496211000  |
| 6  | -6.262181000 | -0.974031000 | 1.175839000  |
| 1  | -6.900322000 | -1.994680000 | -1.306510000 |
| 1  | -6.242346000 | -3.621691000 | -1.062605000 |
| 1  | -7.603019000 | -3.058782000 | -0.066074000 |
| 1  | -4.578984000 | -2.885490000 | 2.219252000  |
| 1  | -6.194219000 | -3.610279000 | 2.050475000  |
| 1  | -4.861582000 | -4.141085000 | 1.001791000  |
| 1  | -7.183265000 | -1.230730000 | 1.716998000  |
| 1  | -5.547760000 | -0.559402000 | 1.897862000  |
| 1  | -6.500559000 | -0.186453000 | 0.451225000  |

**B16**

-----  
Coordinates (Angstroms)  
-----

|    | X            | Y            | Z            |
|----|--------------|--------------|--------------|
| 44 | -0.448668000 | -0.331483000 | -0.624275000 |
| 6  | 1.658358000  | 1.746110000  | -1.015578000 |
| 6  | 2.831175000  | 2.377309000  | -1.429700000 |
| 6  | 3.815476000  | 1.639919000  | -2.069890000 |
| 6  | 3.597201000  | 0.285908000  | -2.293055000 |
| 6  | 2.405265000  | -0.275600000 | -1.865556000 |
| 7  | 1.455718000  | 0.426042000  | -1.232008000 |
| 1  | 4.735566000  | 2.116335000  | -2.390512000 |
| 1  | 2.977330000  | 3.435620000  | -1.251231000 |
| 1  | 4.335449000  | -0.336998000 | -2.783151000 |
| 1  | 2.192100000  | -1.324506000 | -2.022843000 |
| 6  | 0.578178000  | 2.451328000  | -0.291090000 |
| 6  | 0.616287000  | 3.798593000  | 0.062894000  |
| 6  | -0.442640000 | 4.332301000  | 0.784178000  |
| 6  | -1.496763000 | 3.510321000  | 1.164843000  |
| 6  | -1.478355000 | 2.169007000  | 0.795573000  |
| 7  | -0.469340000 | 1.678864000  | 0.054223000  |
| 1  | -0.438529000 | 5.381475000  | 1.060096000  |
| 1  | 1.453258000  | 4.425709000  | -0.217581000 |
| 1  | -2.322666000 | 3.895790000  | 1.752176000  |
| 6  | -2.518748000 | 1.186267000  | 1.262575000  |
| 15 | -2.608108000 | -0.329765000 | 0.175233000  |
| 6  | -0.343935000 | -2.101974000 | -1.155204000 |
| 8  | -0.248798000 | -3.220028000 | -1.466833000 |
| 6  | -3.968241000 | 0.111989000  | -1.075487000 |
| 6  | -3.636766000 | 1.511460000  | -1.625366000 |
| 6  | -3.915371000 | -0.884241000 | -2.244557000 |
| 6  | -5.389068000 | 0.160806000  | -0.499584000 |
| 1  | -3.784710000 | 2.295721000  | -0.875521000 |
| 1  | -2.610979000 | 1.561726000  | -2.001000000 |
| 1  | -4.313776000 | 1.731919000  | -2.458907000 |
| 1  | -4.170849000 | -1.903151000 | -1.942741000 |
| 1  | -4.637805000 | -0.577182000 | -3.010438000 |
| 1  | -2.920018000 | -0.898268000 | -2.695453000 |
| 1  | -6.070262000 | 0.546829000  | -1.267608000 |
| 1  | -5.760929000 | -0.824805000 | -0.209989000 |
| 1  | -5.465176000 | 0.830504000  | 0.363728000  |
| 6  | -3.228176000 | -1.666051000 | 1.370350000  |
| 6  | -3.729112000 | -2.872481000 | 0.561583000  |
| 6  | -2.033466000 | -2.135452000 | 2.217796000  |
| 6  | -4.325084000 | -1.187447000 | 2.336385000  |
| 1  | -4.676111000 | -2.674194000 | 0.053549000  |
| 1  | -2.995225000 | -3.192227000 | -0.184854000 |

|   |              |              |              |
|---|--------------|--------------|--------------|
| 1 | -3.895603000 | -3.715300000 | 1.242709000  |
| 1 | -1.564393000 | -1.317196000 | 2.772323000  |
| 1 | -2.389492000 | -2.876059000 | 2.944424000  |
| 1 | -1.256712000 | -2.592012000 | 1.602440000  |
| 1 | -4.608204000 | -2.022316000 | 2.988625000  |
| 1 | -3.974923000 | -0.380187000 | 2.987544000  |
| 1 | -5.230855000 | -0.849930000 | 1.833453000  |
| 1 | -2.191183000 | 0.821371000  | 2.243613000  |
| 1 | -3.488030000 | 1.672038000  | 1.407635000  |
| 1 | -0.979098000 | 0.172097000  | -2.151287000 |
| 1 | 0.119614000  | -0.724663000 | 0.916055000  |
| 6 | 2.664843000  | 1.344382000  | 2.129941000  |
| 8 | 3.398113000  | 0.723117000  | 3.177138000  |
| 6 | 2.708711000  | -0.117293000 | 2.250048000  |
| 1 | 1.823180000  | -0.605421000 | 2.652543000  |
| 1 | 1.765619000  | 1.879352000  | 2.434477000  |
| 1 | 3.269885000  | 1.829311000  | 1.364375000  |
| 6 | 3.539507000  | -0.961062000 | 1.344454000  |
| 6 | 2.986236000  | -2.106981000 | 0.770255000  |
| 6 | 4.860539000  | -0.617801000 | 1.050575000  |
| 6 | 3.741044000  | -2.893165000 | -0.096005000 |
| 1 | 1.951401000  | -2.359529000 | 0.981177000  |
| 6 | 5.613916000  | -1.402967000 | 0.183635000  |
| 1 | 5.298126000  | 0.258095000  | 1.520550000  |
| 6 | 5.055824000  | -2.542752000 | -0.393610000 |
| 1 | 3.296927000  | -3.779019000 | -0.540455000 |
| 1 | 6.642919000  | -1.131837000 | -0.034110000 |
| 1 | 5.647003000  | -3.159010000 | -1.064571000 |

### TSB16-17

| -----                   |              |              |              |
|-------------------------|--------------|--------------|--------------|
| Coordinates (Angstroms) |              |              |              |
|                         | X            | Y            | Z            |
| -----                   |              |              |              |
| 44                      | -0.123904000 | -1.053268000 | -0.625842000 |
| 6                       | -2.766620000 | -1.423823000 | 0.716840000  |
| 6                       | -4.093315000 | -1.784149000 | 0.943995000  |
| 6                       | -4.861579000 | -2.261735000 | -0.107845000 |
| 6                       | -4.283116000 | -2.368440000 | -1.366632000 |
| 6                       | -2.955531000 | -2.001659000 | -1.522712000 |
| 7                       | -2.206897000 | -1.542828000 | -0.510719000 |
| 1                       | -5.897283000 | -2.539839000 | 0.053809000  |
| 1                       | -4.527675000 | -1.687510000 | 1.931128000  |
| 1                       | -4.843848000 | -2.728619000 | -2.220977000 |
| 1                       | -2.460617000 | -2.072950000 | -2.483625000 |

|    |              |              |              |
|----|--------------|--------------|--------------|
| 6  | -1.892242000 | -0.854793000 | 1.768737000  |
| 6  | -2.302175000 | -0.584532000 | 3.071365000  |
| 6  | -1.405285000 | 0.019906000  | 3.943650000  |
| 6  | -0.140461000 | 0.373504000  | 3.492549000  |
| 6  | 0.213180000  | 0.091420000  | 2.176088000  |
| 7  | -0.645707000 | -0.544913000 | 1.361732000  |
| 1  | -1.700105000 | 0.230826000  | 4.966092000  |
| 1  | -3.302400000 | -0.831276000 | 3.404841000  |
| 1  | 0.564388000  | 0.879434000  | 4.142436000  |
| 6  | 1.509103000  | 0.553632000  | 1.569886000  |
| 15 | 1.992415000  | -0.470246000 | 0.088356000  |
| 6  | 0.302431000  | -1.468239000 | -2.384323000 |
| 8  | 0.567562000  | -1.729773000 | -3.485068000 |
| 6  | 3.030791000  | -1.870512000 | 0.839422000  |
| 6  | 2.226294000  | -2.459956000 | 2.012664000  |
| 6  | 3.225583000  | -2.974819000 | -0.211711000 |
| 6  | 4.395421000  | -1.427891000 | 1.384411000  |
| 1  | 2.161943000  | -1.767412000 | 2.858114000  |
| 1  | 1.215283000  | -2.743735000 | 1.709187000  |
| 1  | 2.736505000  | -3.361290000 | 2.371235000  |
| 1  | 3.837271000  | -2.648219000 | -1.055683000 |
| 1  | 3.736386000  | -3.826546000 | 0.253280000  |
| 1  | 2.263711000  | -3.322425000 | -0.598057000 |
| 1  | 4.860280000  | -2.275731000 | 1.901601000  |
| 1  | 5.084922000  | -1.117455000 | 0.596368000  |
| 1  | 4.310776000  | -0.614448000 | 2.112841000  |
| 6  | 3.087582000  | 0.696709000  | -0.921559000 |
| 6  | 3.911305000  | -0.113997000 | -1.933532000 |
| 6  | 2.156197000  | 1.628944000  | -1.710483000 |
| 6  | 4.012295000  | 1.572666000  | -0.061431000 |
| 1  | 4.713920000  | -0.687160000 | -1.463561000 |
| 1  | 3.283784000  | -0.800036000 | -2.511367000 |
| 1  | 4.378728000  | 0.577887000  | -2.643627000 |
| 1  | 1.497980000  | 2.203446000  | -1.055394000 |
| 1  | 2.767230000  | 2.340162000  | -2.279630000 |
| 1  | 1.525743000  | 1.076122000  | -2.408752000 |
| 1  | 4.622587000  | 2.198308000  | -0.723352000 |
| 1  | 3.443356000  | 2.250168000  | 0.582538000  |
| 1  | 4.695862000  | 0.997735000  | 0.563756000  |
| 1  | 1.324880000  | 1.565087000  | 1.183723000  |
| 1  | 2.297735000  | 0.628097000  | 2.323849000  |
| 1  | 0.163420000  | -2.621968000 | -0.196859000 |
| 1  | -0.520610000 | 0.625195000  | -0.999893000 |
| 6  | -1.617156000 | 1.731845000  | -1.395761000 |

|   |              |             |              |
|---|--------------|-------------|--------------|
| 8 | -2.551986000 | 2.738681000 | -2.678122000 |
| 6 | -1.505518000 | 1.882494000 | -2.847664000 |
| 1 | -0.549376000 | 2.308441000 | -3.209256000 |
| 1 | -2.439258000 | 1.108449000 | -1.067190000 |
| 6 | -1.164589000 | 2.776275000 | -0.441447000 |
| 6 | -1.465114000 | 2.641653000 | 0.916533000  |
| 6 | -0.404203000 | 3.878682000 | -0.847617000 |
| 6 | -0.988562000 | 3.556117000 | 1.852148000  |
| 1 | -2.080830000 | 1.808709000 | 1.243402000  |
| 6 | 0.072528000  | 4.793231000 | 0.084127000  |
| 1 | -0.203553000 | 4.027725000 | -1.902708000 |
| 6 | -0.206738000 | 4.631699000 | 1.441068000  |
| 1 | -1.231633000 | 3.425076000 | 2.902661000  |
| 1 | 0.661475000  | 5.641714000 | -0.251662000 |
| 1 | 0.166608000  | 5.348343000 | 2.166389000  |
| 1 | -1.691440000 | 0.940677000 | -3.400132000 |

#### TSC16-17

| -----                   |              |              |              |
|-------------------------|--------------|--------------|--------------|
| Coordinates (Angstroms) |              |              |              |
|                         | X            | Y            | Z            |
| -----                   |              |              |              |
| 44                      | -0.253963000 | -0.029295000 | -0.637247000 |
| 6                       | 1.575364000  | 2.330027000  | -0.521097000 |
| 6                       | 2.674305000  | 3.161001000  | -0.728181000 |
| 6                       | 3.786820000  | 2.668307000  | -1.395142000 |
| 6                       | 3.776494000  | 1.350244000  | -1.832006000 |
| 6                       | 2.649477000  | 0.578010000  | -1.596056000 |
| 7                       | 1.568014000  | 1.050623000  | -0.965398000 |
| 1                       | 4.650812000  | 3.302797000  | -1.560659000 |
| 1                       | 2.667346000  | 4.180812000  | -0.363538000 |
| 1                       | 4.627831000  | 0.909087000  | -2.335702000 |
| 1                       | 2.605177000  | -0.459834000 | -1.901031000 |
| 6                       | 0.370210000  | 2.758946000  | 0.226602000  |
| 6                       | 0.202141000  | 4.022497000  | 0.787603000  |
| 6                       | -0.954955000 | 4.287144000  | 1.506951000  |
| 6                       | -1.900552000 | 3.283851000  | 1.680810000  |
| 6                       | -1.677447000 | 2.035794000  | 1.108020000  |
| 7                       | -0.576740000 | 1.811739000  | 0.368973000  |
| 1                       | -1.109976000 | 5.266838000  | 1.946079000  |
| 1                       | 0.956818000  | 4.789636000  | 0.667953000  |
| 1                       | -2.799288000 | 3.457728000  | 2.261747000  |
| 6                       | -2.591537000 | 0.861775000  | 1.340990000  |
| 15                      | -2.422107000 | -0.444699000 | 0.018675000  |
| 6                       | 0.040086000  | -1.633471000 | -1.520013000 |

|   |              |              |              |
|---|--------------|--------------|--------------|
| 8 | 0.209680000  | -2.636272000 | -2.083693000 |
| 6 | -3.774560000 | 0.019293000  | -1.227424000 |
| 6 | -3.628410000 | 1.525137000  | -1.513534000 |
| 6 | -3.529556000 | -0.743931000 | -2.538747000 |
| 6 | -5.207009000 | -0.232682000 | -0.740346000 |
| 1 | -3.915665000 | 2.140864000  | -0.654641000 |
| 1 | -2.607569000 | 1.780980000  | -1.809652000 |
| 1 | -4.297273000 | 1.793353000  | -2.339434000 |
| 1 | -3.638067000 | -1.824959000 | -2.421489000 |
| 1 | -4.263499000 | -0.418638000 | -3.285684000 |
| 1 | -2.529424000 | -0.538019000 | -2.928237000 |
| 1 | -5.909330000 | 0.182486000  | -1.472996000 |
| 1 | -5.435280000 | -1.296812000 | -0.644760000 |
| 1 | -5.412818000 | 0.255445000  | 0.218053000  |
| 6 | -2.874702000 | -2.041964000 | 0.933535000  |
| 6 | -3.159341000 | -3.149132000 | -0.092977000 |
| 6 | -1.648986000 | -2.467777000 | 1.759616000  |
| 6 | -4.063728000 | -1.901339000 | 1.898337000  |
| 1 | -4.100856000 | -2.993491000 | -0.625761000 |
| 1 | -2.354032000 | -3.238627000 | -0.828571000 |
| 1 | -3.236597000 | -4.110145000 | 0.428589000  |
| 1 | -1.350904000 | -1.707474000 | 2.487261000  |
| 1 | -1.899412000 | -3.378601000 | 2.316578000  |
| 1 | -0.783905000 | -2.672691000 | 1.126772000  |
| 1 | -4.219962000 | -2.861770000 | 2.403248000  |
| 1 | -3.874499000 | -1.157942000 | 2.679142000  |
| 1 | -4.997912000 | -1.642326000 | 1.400358000  |
| 1 | -2.269610000 | 0.386341000  | 2.275439000  |
| 1 | -3.625022000 | 1.186508000  | 1.491699000  |
| 1 | -0.786657000 | 0.625010000  | -2.062469000 |
| 1 | 0.379781000  | -0.589342000 | 0.894725000  |
| 6 | 1.309818000  | -0.313695000 | 2.155301000  |
| 8 | 2.589910000  | -0.684373000 | 3.376264000  |
| 6 | 2.216970000  | -1.455765000 | 2.307807000  |
| 1 | 1.710717000  | -2.409731000 | 2.540403000  |
| 1 | 0.455148000  | -0.239109000 | 2.814720000  |
| 1 | 1.727009000  | 0.596023000  | 1.745625000  |
| 6 | 3.225988000  | -1.655103000 | 1.200469000  |
| 6 | 2.983880000  | -2.547018000 | 0.153893000  |
| 6 | 4.410005000  | -0.919654000 | 1.207901000  |
| 6 | 3.911580000  | -2.698818000 | -0.873922000 |
| 1 | 2.063068000  | -3.123817000 | 0.143701000  |
| 6 | 5.342157000  | -1.072241000 | 0.184757000  |
| 1 | 4.578135000  | -0.241571000 | 2.038989000  |

|   |             |              |              |
|---|-------------|--------------|--------------|
| 6 | 5.095623000 | -1.961899000 | -0.860025000 |
| 1 | 3.711668000 | -3.396146000 | -1.682493000 |
| 1 | 6.267292000 | -0.502452000 | 0.204676000  |
| 1 | 5.826248000 | -2.087544000 | -1.654204000 |

---

**B17**

---

| Coordinates (Angstroms) |              |              |              |
|-------------------------|--------------|--------------|--------------|
|                         | X            | Y            | Z            |
| 44                      | 0.404420000  | -0.408632000 | 0.751442000  |
| 6                       | -2.156651000 | 1.058339000  | 1.214665000  |
| 6                       | -3.456986000 | 1.356820000  | 1.606037000  |
| 6                       | -4.175577000 | 0.426303000  | 2.345582000  |
| 6                       | -3.574945000 | -0.778421000 | 2.677179000  |
| 6                       | -2.277655000 | -1.015920000 | 2.245190000  |
| 7                       | -1.583335000 | -0.126007000 | 1.528508000  |
| 1                       | -5.196045000 | 0.639370000  | 2.644419000  |
| 1                       | -3.919723000 | 2.291358000  | 1.317291000  |
| 1                       | -4.097401000 | -1.538913000 | 3.244697000  |
| 1                       | -1.777557000 | -1.952474000 | 2.456747000  |
| 6                       | -1.333861000 | 1.984084000  | 0.397759000  |
| 6                       | -1.719882000 | 3.274947000  | 0.053849000  |
| 6                       | -0.888197000 | 4.027349000  | -0.764768000 |
| 6                       | 0.298095000  | 3.479081000  | -1.234545000 |
| 6                       | 0.642342000  | 2.186591000  | -0.850013000 |
| 7                       | -0.160015000 | 1.483280000  | -0.032213000 |
| 1                       | -1.169517000 | 5.037890000  | -1.041496000 |
| 1                       | -2.651157000 | 3.692758000  | 0.413415000  |
| 1                       | 0.952854000  | 4.040930000  | -1.890763000 |
| 6                       | 1.875607000  | 1.491936000  | -1.364907000 |
| 15                      | 2.440950000  | 0.122406000  | -0.231007000 |
| 6                       | 0.930838000  | -2.014974000 | 1.552053000  |
| 8                       | 1.285926000  | -2.967707000 | 2.101471000  |
| 6                       | 3.678400000  | 0.967773000  | 0.921394000  |
| 6                       | 3.033142000  | 2.268871000  | 1.434242000  |
| 6                       | 3.953693000  | 0.054925000  | 2.127646000  |
| 6                       | 5.002764000  | 1.333481000  | 0.238549000  |
| 1                       | 2.922668000  | 3.018326000  | 0.644091000  |
| 1                       | 2.055577000  | 2.096505000  | 1.892421000  |
| 1                       | 3.686807000  | 2.702389000  | 2.199357000  |
| 1                       | 4.394666000  | -0.902311000 | 1.840376000  |
| 1                       | 4.660620000  | 0.555209000  | 2.799650000  |
| 1                       | 3.038879000  | -0.147125000 | 2.690076000  |
| 1                       | 5.599593000  | 1.946146000  | 0.924043000  |

|   |              |              |              |
|---|--------------|--------------|--------------|
| 1 | 5.599817000  | 0.452444000  | -0.008004000 |
| 1 | 4.851824000  | 1.919865000  | -0.673570000 |
| 6 | 3.289307000  | -1.094642000 | -1.399343000 |
| 6 | 4.104156000  | -2.104986000 | -0.578513000 |
| 6 | 2.167529000  | -1.859702000 | -2.120809000 |
| 6 | 4.184241000  | -0.436736000 | -2.461934000 |
| 1 | 4.996429000  | -1.658240000 | -0.132191000 |
| 1 | 3.506817000  | -2.562816000 | 0.215994000  |
| 1 | 4.438994000  | -2.911664000 | -1.239970000 |
| 1 | 1.508319000  | -1.201701000 | -2.695608000 |
| 1 | 2.618161000  | -2.563804000 | -2.829119000 |
| 1 | 1.548507000  | -2.436396000 | -1.428630000 |
| 1 | 4.565891000  | -1.219539000 | -3.127531000 |
| 1 | 3.632600000  | 0.270186000  | -3.089097000 |
| 1 | 5.047733000  | 0.078266000  | -2.040765000 |
| 1 | 1.609572000  | 1.012076000  | -2.314517000 |
| 1 | 2.670189000  | 2.209957000  | -1.587453000 |
| 1 | 0.940981000  | 0.290624000  | 2.032338000  |
| 1 | -0.432149000 | -1.105250000 | -1.125504000 |
| 6 | -1.267288000 | -1.727617000 | -1.544364000 |
| 8 | -2.298407000 | -3.886138000 | -1.234215000 |
| 6 | -1.387125000 | -3.071463000 | -0.757012000 |
| 1 | -0.317615000 | -3.468448000 | -0.733501000 |
| 1 | -0.942073000 | -1.955969000 | -2.569159000 |
| 6 | -2.514366000 | -0.875630000 | -1.593582000 |
| 6 | -2.477684000 | 0.415684000  | -2.130800000 |
| 6 | -3.733046000 | -1.353665000 | -1.095979000 |
| 6 | -3.612447000 | 1.223704000  | -2.153401000 |
| 1 | -1.541928000 | 0.798087000  | -2.535684000 |
| 6 | -4.865864000 | -0.544102000 | -1.110121000 |
| 1 | -3.749124000 | -2.393236000 | -0.769982000 |
| 6 | -4.813167000 | 0.747677000  | -1.633155000 |
| 1 | -3.555721000 | 2.222645000  | -2.578053000 |
| 1 | -5.803323000 | -0.930762000 | -0.718567000 |
| 1 | -5.703654000 | 1.370463000  | -1.650516000 |
| 1 | -1.528197000 | -2.741501000 | 0.328916000  |

## C17

| -----                   |              |              |              |
|-------------------------|--------------|--------------|--------------|
| Coordinates (Angstroms) |              |              |              |
|                         | X            | Y            | Z            |
| -----                   |              |              |              |
| 44                      | -0.202878000 | -0.035120000 | -0.566672000 |
| 6                       | 1.533784000  | 2.394486000  | -0.535054000 |
| 6                       | 2.601518000  | 3.256965000  | -0.754905000 |



|    |              |              |              |
|----|--------------|--------------|--------------|
| 6  | 3.745212000  | 2.779543000  | -1.384572000 |
| 6  | 3.795695000  | 1.448343000  | -1.767223000 |
| 6  | 2.691861000  | 0.641879000  | -1.523257000 |
| 7  | 1.583371000  | 1.101433000  | -0.936146000 |
| 1  | 4.587991000  | 3.440343000  | -1.555752000 |
| 1  | 2.555599000  | 4.287226000  | -0.424650000 |
| 1  | 4.674462000  | 1.018486000  | -2.231647000 |
| 1  | 2.701334000  | -0.411287000 | -1.777203000 |
| 6  | 0.308490000  | 2.799836000  | 0.198308000  |
| 6  | 0.080126000  | 4.077590000  | 0.696444000  |
| 6  | -1.086414000 | 4.318786000  | 1.411883000  |
| 6  | -1.986297000 | 3.285403000  | 1.634197000  |
| 6  | -1.704284000 | 2.023101000  | 1.120119000  |
| 7  | -0.590011000 | 1.816099000  | 0.399341000  |
| 1  | -1.284546000 | 5.309721000  | 1.805982000  |
| 1  | 0.794517000  | 4.874531000  | 0.535427000  |
| 1  | -2.893110000 | 3.446054000  | 2.205750000  |
| 6  | -2.578206000 | 0.824898000  | 1.381651000  |
| 15 | -2.396093000 | -0.473845000 | 0.055565000  |
| 6  | 0.067515000  | -1.602256000 | -1.546657000 |
| 8  | 0.176993000  | -2.543789000 | -2.210079000 |
| 6  | -3.700483000 | 0.002408000  | -1.227862000 |
| 6  | -3.549284000 | 1.508476000  | -1.510971000 |
| 6  | -3.434037000 | -0.762512000 | -2.534625000 |
| 6  | -5.140889000 | -0.250549000 | -0.763656000 |
| 1  | -3.838427000 | 2.124502000  | -0.653609000 |
| 1  | -2.529695000 | 1.772872000  | -1.803622000 |
| 1  | -4.214811000 | 1.776785000  | -2.339075000 |
| 1  | -3.521990000 | -1.844604000 | -2.415632000 |
| 1  | -4.171595000 | -0.453113000 | -3.284037000 |
| 1  | -2.439577000 | -0.541690000 | -2.930594000 |
| 1  | -5.831572000 | 0.163788000  | -1.507117000 |
| 1  | -5.368176000 | -1.314799000 | -0.670024000 |
| 1  | -5.360579000 | 0.237311000  | 0.191470000  |
| 6  | -2.840424000 | -2.083618000 | 0.938630000  |
| 6  | -3.115768000 | -3.181459000 | -0.100048000 |
| 6  | -1.606335000 | -2.502122000 | 1.756260000  |
| 6  | -4.031740000 | -1.955085000 | 1.901054000  |
| 1  | -4.055129000 | -3.025222000 | -0.636248000 |
| 1  | -2.306069000 | -3.265286000 | -0.831674000 |
| 1  | -3.192002000 | -4.145410000 | 0.415238000  |
| 1  | -1.302922000 | -1.746472000 | 2.485945000  |
| 1  | -1.843705000 | -3.416488000 | 2.311508000  |
| 1  | -0.746711000 | -2.713890000 | 1.115953000  |

|   |              |              |              |
|---|--------------|--------------|--------------|
| 1 | -4.188272000 | -2.921711000 | 2.393020000  |
| 1 | -3.844724000 | -1.221497000 | 2.691150000  |
| 1 | -4.963916000 | -1.690214000 | 1.401185000  |
| 1 | -2.225816000 | 0.360653000  | 2.310885000  |
| 1 | -3.618474000 | 1.119655000  | 1.546028000  |
| 1 | -0.772913000 | 0.537521000  | -1.901072000 |
| 1 | 0.621446000  | -0.868513000 | 1.197910000  |
| 6 | 1.193165000  | -0.347927000 | 2.005528000  |
| 8 | 3.095189000  | -0.544363000 | 3.411808000  |
| 6 | 2.413412000  | -1.208240000 | 2.509155000  |
| 1 | 1.941175000  | -2.187199000 | 2.847177000  |
| 1 | 0.503807000  | -0.150913000 | 2.833343000  |
| 1 | 1.600646000  | 0.601992000  | 1.655620000  |
| 6 | 3.208967000  | -1.604458000 | 1.234810000  |
| 6 | 2.740695000  | -2.510200000 | 0.278700000  |
| 6 | 4.457805000  | -1.019398000 | 1.036824000  |
| 6 | 3.492449000  | -2.814727000 | -0.855473000 |
| 1 | 1.781094000  | -3.001843000 | 0.434598000  |
| 6 | 5.217181000  | -1.314172000 | -0.093514000 |
| 1 | 4.792029000  | -0.346632000 | 1.822921000  |
| 6 | 4.736572000  | -2.211427000 | -1.048199000 |
| 1 | 3.112579000  | -3.525602000 | -1.584876000 |
| 1 | 6.192722000  | -0.852242000 | -0.229780000 |
| 1 | 5.330666000  | -2.452748000 | -1.925867000 |

## B18

Coordinates (Angstroms)

|    | X            | Y            | Z            |
|----|--------------|--------------|--------------|
| 44 | -0.454723000 | 0.598341000  | 0.617455000  |
| 6  | 2.135185000  | -0.759211000 | 1.263243000  |
| 6  | 3.394325000  | -1.015747000 | 1.800712000  |
| 6  | 4.065988000  | -0.008577000 | 2.476926000  |
| 6  | 3.455544000  | 1.231413000  | 2.611363000  |
| 6  | 2.200595000  | 1.416586000  | 2.052914000  |
| 7  | 1.554316000  | 0.455090000  | 1.383660000  |
| 1  | 5.050530000  | -0.191371000 | 2.893437000  |
| 1  | 3.851016000  | -1.990552000 | 1.688342000  |
| 1  | 3.937223000  | 2.049360000  | 3.134133000  |
| 1  | 1.684438000  | 2.365882000  | 2.134992000  |
| 6  | 1.359953000  | -1.775203000 | 0.510742000  |
| 6  | 1.846807000  | -3.029321000 | 0.154957000  |
| 6  | 1.044708000  | -3.859435000 | -0.618461000 |
| 6  | -0.194496000 | -3.410084000 | -1.054948000 |

|    |              |              |              |
|----|--------------|--------------|--------------|
| 6  | -0.621515000 | -2.138218000 | -0.680259000 |
| 7  | 0.134231000  | -1.382828000 | 0.128780000  |
| 1  | 1.399565000  | -4.844645000 | -0.902938000 |
| 1  | 2.837793000  | -3.349702000 | 0.450280000  |
| 1  | -0.818861000 | -4.023356000 | -1.694932000 |
| 6  | -1.873762000 | -1.509636000 | -1.228387000 |
| 15 | -2.512092000 | -0.133617000 | -0.149410000 |
| 6  | -0.924208000 | 2.340824000  | 1.024929000  |
| 8  | -1.210589000 | 3.435807000  | 1.293971000  |
| 6  | -3.600947000 | -1.011947000 | 1.128143000  |
| 6  | -2.769991000 | -2.159760000 | 1.729653000  |
| 6  | -3.952351000 | -0.031034000 | 2.258400000  |
| 6  | -4.886247000 | -1.618675000 | 0.548776000  |
| 1  | -2.568958000 | -2.949624000 | 0.998605000  |
| 1  | -1.818915000 | -1.803209000 | 2.132806000  |
| 1  | -3.337623000 | -2.613352000 | 2.550507000  |
| 1  | -4.613280000 | 0.772023000  | 1.925319000  |
| 1  | -4.473544000 | -0.573912000 | 3.056242000  |
| 1  | -3.050703000 | 0.417902000  | 2.683655000  |
| 1  | -5.392600000 | -2.190991000 | 1.335394000  |
| 1  | -5.591890000 | -0.861917000 | 0.199264000  |
| 1  | -4.683432000 | -2.311553000 | -0.274676000 |
| 6  | -3.570144000 | 0.896218000  | -1.330133000 |
| 6  | -4.544738000 | 1.784655000  | -0.542793000 |
| 6  | -2.611996000 | 1.820803000  | -2.100606000 |
| 6  | -4.339616000 | 0.039948000  | -2.348076000 |
| 1  | -5.369207000 | 1.225192000  | -0.094016000 |
| 1  | -4.033579000 | 2.345220000  | 0.246483000  |
| 1  | -4.984276000 | 2.516561000  | -1.230630000 |
| 1  | -1.758754000 | 1.282236000  | -2.518420000 |
| 1  | -3.169381000 | 2.319802000  | -2.902905000 |
| 1  | -2.199481000 | 2.591052000  | -1.443759000 |
| 1  | -4.953669000 | 0.699695000  | -2.972601000 |
| 1  | -3.661802000 | -0.496265000 | -3.018726000 |
| 1  | -5.009098000 | -0.686863000 | -1.885154000 |
| 1  | -2.623089000 | -2.261004000 | -1.490761000 |
| 1  | -0.867900000 | 0.210117000  | 2.132634000  |
| 6  | 0.792405000  | 1.838860000  | -2.022990000 |
| 6  | 2.136209000  | 2.206912000  | -1.374038000 |
| 1  | 0.164442000  | 2.756950000  | -1.965735000 |
| 1  | 0.986166000  | 1.691366000  | -3.108175000 |
| 1  | 2.534834000  | 3.107494000  | -1.863478000 |
| 6  | 3.204275000  | 1.133475000  | -1.393684000 |
| 6  | 4.474386000  | 1.410972000  | -0.873385000 |

|   |              |              |              |
|---|--------------|--------------|--------------|
| 6 | 2.974155000  | -0.144417000 | -1.914623000 |
| 6 | 5.481749000  | 0.451440000  | -0.869495000 |
| 1 | 4.671769000  | 2.397331000  | -0.458653000 |
| 6 | 3.983704000  | -1.105026000 | -1.921074000 |
| 1 | 1.974008000  | -0.383793000 | -2.260177000 |
| 6 | 5.240487000  | -0.815877000 | -1.397107000 |
| 1 | 6.456857000  | 0.692946000  | -0.455165000 |
| 1 | 3.780416000  | -2.090148000 | -2.332900000 |
| 1 | 6.025073000  | -1.567278000 | -1.401188000 |
| 1 | -1.558131000 | -0.990806000 | -2.141721000 |
| 1 | 1.944390000  | 2.490480000  | -0.331553000 |
| 8 | 0.173871000  | 0.731757000  | -1.502966000 |

### C18

#### Coordinates (Angstroms)

|    | X            | Y            | Z            |
|----|--------------|--------------|--------------|
| 44 | -0.175587000 | -0.089924000 | -0.642765000 |
| 6  | 1.946279000  | 2.002254000  | -0.412764000 |
| 6  | 3.109992000  | 2.732336000  | -0.640740000 |
| 6  | 4.087166000  | 2.215307000  | -1.479658000 |
| 6  | 3.876413000  | 0.977333000  | -2.070480000 |
| 6  | 2.696063000  | 0.302474000  | -1.797240000 |
| 7  | 1.752669000  | 0.794299000  | -0.988348000 |
| 1  | 4.999643000  | 2.771741000  | -1.665434000 |
| 1  | 3.253776000  | 3.698637000  | -0.173432000 |
| 1  | 4.611507000  | 0.527621000  | -2.726881000 |
| 1  | 2.495102000  | -0.671284000 | -2.225524000 |
| 6  | 0.855300000  | 2.480282000  | 0.471639000  |
| 6  | 0.911565000  | 3.643775000  | 1.233464000  |
| 6  | -0.163693000 | 3.954853000  | 2.057227000  |
| 6  | -1.243709000 | 3.086718000  | 2.137725000  |
| 6  | -1.237018000 | 1.928089000  | 1.363813000  |
| 7  | -0.224054000 | 1.682018000  | 0.521950000  |
| 1  | -0.146861000 | 4.863326000  | 2.650180000  |
| 1  | 1.773007000  | 4.298565000  | 1.195401000  |
| 1  | -2.076254000 | 3.289061000  | 2.801952000  |
| 6  | -2.296301000 | 0.866144000  | 1.484924000  |
| 15 | -2.403127000 | -0.201686000 | -0.037282000 |
| 6  | -0.107331000 | -1.630795000 | -1.667493000 |
| 8  | -0.067679000 | -2.586529000 | -2.329203000 |
| 6  | -3.607595000 | 0.730781000  | -1.164721000 |
| 6  | -3.130780000 | 2.192637000  | -1.246903000 |
| 6  | -3.552718000 | 0.128232000  | -2.577782000 |

|   |              |              |              |
|---|--------------|--------------|--------------|
| 6 | -5.056769000 | 0.739834000  | -0.660233000 |
| 1 | -3.243042000 | 2.717133000  | -0.292348000 |
| 1 | -2.088395000 | 2.263798000  | -1.567292000 |
| 1 | -3.747915000 | 2.723169000  | -1.981367000 |
| 1 | -3.943789000 | -0.890904000 | -2.615358000 |
| 1 | -4.165811000 | 0.739023000  | -3.251402000 |
| 1 | -2.528994000 | 0.118614000  | -2.960804000 |
| 1 | -5.657094000 | 1.384813000  | -1.313140000 |
| 1 | -5.516677000 | -0.250565000 | -0.678321000 |
| 1 | -5.140412000 | 1.143414000  | 0.354372000  |
| 6 | -3.192936000 | -1.794257000 | 0.604257000  |
| 6 | -3.775133000 | -2.609678000 | -0.559365000 |
| 6 | -2.055771000 | -2.616028000 | 1.232365000  |
| 6 | -4.268922000 | -1.558987000 | 1.676763000  |
| 1 | -4.687694000 | -2.173428000 | -0.973145000 |
| 1 | -3.048310000 | -2.731591000 | -1.368948000 |
| 1 | -4.027572000 | -3.612293000 | -0.194632000 |
| 1 | -1.439354000 | -2.020645000 | 1.909248000  |
| 1 | -2.484324000 | -3.469899000 | 1.770661000  |
| 1 | -1.381671000 | -3.000644000 | 0.462984000  |
| 1 | -4.685534000 | -2.528084000 | 1.975775000  |
| 1 | -3.850373000 | -1.100854000 | 2.577939000  |
| 1 | -5.099161000 | -0.940581000 | 1.332221000  |
| 1 | -3.254844000 | 1.287163000  | 1.801169000  |
| 1 | -0.608326000 | 0.692480000  | -1.992833000 |
| 6 | 1.218913000  | -1.928045000 | 1.457693000  |
| 1 | 0.806290000  | -2.786085000 | 0.880450000  |
| 8 | 0.442916000  | -0.802870000 | 1.350169000  |
| 6 | 2.648534000  | -1.733102000 | 0.945106000  |
| 6 | 3.406593000  | -0.645118000 | 1.390657000  |
| 6 | 3.234216000  | -2.622988000 | 0.046069000  |
| 6 | 4.715633000  | -0.461743000 | 0.963036000  |
| 1 | 2.943302000  | 0.064314000  | 2.070680000  |
| 6 | 4.547381000  | -2.444093000 | -0.392421000 |
| 1 | 2.653282000  | -3.468093000 | -0.317604000 |
| 6 | 5.293967000  | -1.364306000 | 0.067717000  |
| 1 | 5.288972000  | 0.389722000  | 1.320146000  |
| 1 | 4.984093000  | -3.149918000 | -1.094033000 |
| 1 | 6.317061000  | -1.221671000 | -0.268777000 |
| 6 | 1.281315000  | -2.387257000 | 2.926354000  |
| 1 | 0.272583000  | -2.607340000 | 3.291554000  |
| 1 | 1.898123000  | -3.285184000 | 3.051928000  |
| 1 | 1.699992000  | -1.590211000 | 3.551271000  |
| 1 | -1.947742000 | 0.181663000  | 2.267250000  |

-----  
**E1**  
-----

Coordinates (Angstroms)

|    | X            | Y            | Z            |
|----|--------------|--------------|--------------|
| 6  | -3.131049000 | 0.307723000  | -0.190920000 |
| 6  | -4.524227000 | 0.367467000  | -0.175247000 |
| 6  | -5.253825000 | -0.810996000 | -0.153334000 |
| 6  | -4.568036000 | -2.020930000 | -0.152229000 |
| 6  | -3.182425000 | -2.002861000 | -0.164299000 |
| 7  | -2.467581000 | -0.868929000 | -0.180385000 |
| 1  | -6.338275000 | -0.785094000 | -0.139819000 |
| 1  | -5.033439000 | 1.323574000  | -0.185283000 |
| 1  | -5.091558000 | -2.969831000 | -0.140019000 |
| 1  | -2.609352000 | -2.922185000 | -0.157968000 |
| 6  | -2.259368000 | 1.494373000  | -0.268458000 |
| 6  | -2.714191000 | 2.810212000  | -0.318018000 |
| 6  | -1.787153000 | 3.829366000  | -0.482980000 |
| 6  | -0.445998000 | 3.505472000  | -0.647555000 |
| 6  | -0.056343000 | 2.170782000  | -0.594193000 |
| 7  | -0.947663000 | 1.195761000  | -0.342709000 |
| 1  | -2.110382000 | 4.864678000  | -0.510202000 |
| 1  | -3.769268000 | 3.037695000  | -0.229064000 |
| 1  | 0.297814000  | 4.273798000  | -0.827273000 |
| 6  | 1.342888000  | 1.725295000  | -0.904596000 |
| 15 | 1.694422000  | 0.064698000  | -0.145153000 |
| 6  | -0.014715000 | -2.453071000 | -0.191941000 |
| 8  | 0.273739000  | -3.570425000 | -0.358877000 |
| 6  | 2.562932000  | 0.547084000  | 1.481169000  |
| 6  | 1.653341000  | 1.580653000  | 2.174049000  |
| 6  | 2.678530000  | -0.690316000 | 2.386421000  |
| 6  | 3.950595000  | 1.185254000  | 1.335186000  |
| 1  | 1.677629000  | 2.550360000  | 1.666888000  |
| 1  | 0.613848000  | 1.252204000  | 2.235338000  |
| 1  | 2.010474000  | 1.741724000  | 3.197898000  |
| 1  | 3.354244000  | -1.444403000 | 1.976555000  |
| 1  | 3.080257000  | -0.387525000 | 3.361186000  |
| 1  | 1.711406000  | -1.164140000 | 2.559205000  |
| 1  | 4.272441000  | 1.566778000  | 2.312188000  |
| 1  | 4.706496000  | 0.467278000  | 1.008652000  |
| 1  | 3.951611000  | 2.031778000  | 0.640901000  |
| 6  | 2.980120000  | -0.659118000 | -1.349276000 |
| 6  | 3.691927000  | -1.845960000 | -0.681436000 |
| 6  | 2.236465000  | -1.196418000 | -2.584147000 |

|    |              |              |              |
|----|--------------|--------------|--------------|
| 6  | 4.023563000  | 0.353144000  | -1.852590000 |
| 1  | 4.386457000  | -1.530572000 | 0.101315000  |
| 1  | 2.979851000  | -2.558023000 | -0.252402000 |
| 1  | 4.278561000  | -2.384368000 | -1.435393000 |
| 1  | 1.649750000  | -0.424378000 | -3.090267000 |
| 1  | 2.978090000  | -1.574939000 | -3.298732000 |
| 1  | 1.556063000  | -2.008890000 | -2.329661000 |
| 1  | 4.677229000  | -0.148125000 | -2.576536000 |
| 1  | 3.561867000  | 1.198462000  | -2.372499000 |
| 1  | 4.662379000  | 0.747302000  | -1.063338000 |
| 1  | 1.386927000  | 1.573452000  | -1.990008000 |
| 1  | 2.078213000  | 2.495656000  | -0.657312000 |
| 1  | -0.361648000 | -0.837471000 | -1.629922000 |
| 25 | -0.433825000 | -0.749284000 | -0.033135000 |
| 6  | -0.624513000 | -0.839384000 | 1.736669000  |
| 8  | -0.845337000 | -1.011777000 | 2.868784000  |

## E2

| -----                   |              |              |              |
|-------------------------|--------------|--------------|--------------|
| Coordinates (Angstroms) |              |              |              |
|                         | X            | Y            | Z            |
| -----                   |              |              |              |
| 6                       | 1.686843000  | 1.740171000  | -0.919084000 |
| 6                       | 2.880784000  | 2.357063000  | -1.291588000 |
| 6                       | 3.830045000  | 1.628610000  | -1.991685000 |
| 6                       | 3.556182000  | 0.301394000  | -2.302400000 |
| 6                       | 2.342254000  | -0.239661000 | -1.910962000 |
| 7                       | 1.418810000  | 0.454149000  | -1.230924000 |
| 1                       | 4.767347000  | 2.088160000  | -2.286216000 |
| 1                       | 3.066822000  | 3.393202000  | -1.034652000 |
| 1                       | 4.268556000  | -0.315728000 | -2.836429000 |
| 1                       | 2.090022000  | -1.267442000 | -2.137321000 |
| 6                       | 0.651921000  | 2.389860000  | -0.095223000 |
| 6                       | 0.752178000  | 3.678185000  | 0.425176000  |
| 6                       | -0.229986000 | 4.123253000  | 1.298166000  |
| 6                       | -1.254254000 | 3.257174000  | 1.662839000  |
| 6                       | -1.299405000 | 1.982179000  | 1.106445000  |
| 7                       | -0.388249000 | 1.585980000  | 0.199903000  |
| 1                       | -0.181163000 | 5.123941000  | 1.714201000  |
| 1                       | 1.585229000  | 4.319111000  | 0.163734000  |
| 1                       | -2.009662000 | 3.556138000  | 2.381068000  |
| 6                       | -2.287747000 | 0.942188000  | 1.549558000  |
| 15                      | -2.484886000 | -0.376854000 | 0.252029000  |
| 6                       | -0.289076000 | -1.896388000 | -1.220224000 |
| 8                       | -0.159932000 | -3.031933000 | -1.456190000 |

|   |              |              |              |
|---|--------------|--------------|--------------|
| 6 | -4.021790000 | 0.224829000  | -0.699568000 |
| 6 | -3.743949000 | 1.691225000  | -1.085128000 |
| 6 | -4.181658000 | -0.599583000 | -1.987204000 |
| 6 | -5.346837000 | 0.195441000  | 0.073226000  |
| 1 | -3.794618000 | 2.359099000  | -0.219004000 |
| 1 | -2.769513000 | 1.822398000  | -1.560811000 |
| 1 | -4.507361000 | 2.025783000  | -1.797273000 |
| 1 | -4.439057000 | -1.641165000 | -1.784760000 |
| 1 | -4.991922000 | -0.172974000 | -2.590895000 |
| 1 | -3.275355000 | -0.591882000 | -2.594204000 |
| 1 | -6.115741000 | 0.707166000  | -0.518755000 |
| 1 | -5.704705000 | -0.822011000 | 0.248036000  |
| 1 | -5.283730000 | 0.713623000  | 1.035727000  |
| 6 | -2.947108000 | -1.901061000 | 1.294178000  |
| 6 | -3.544941000 | -2.977600000 | 0.374798000  |
| 6 | -1.661430000 | -2.474566000 | 1.915696000  |
| 6 | -3.919440000 | -1.612765000 | 2.450182000  |
| 1 | -4.559897000 | -2.729978000 | 0.053291000  |
| 1 | -2.928012000 | -3.144239000 | -0.513798000 |
| 1 | -3.601387000 | -3.927627000 | 0.919497000  |
| 1 | -1.133538000 | -1.743325000 | 2.534735000  |
| 1 | -1.933812000 | -3.321086000 | 2.558178000  |
| 1 | -0.963778000 | -2.829384000 | 1.157117000  |
| 1 | -4.107494000 | -2.547644000 | 2.991898000  |
| 1 | -3.502016000 | -0.904181000 | 3.172461000  |
| 1 | -4.884833000 | -1.231452000 | 2.120178000  |
| 1 | -1.846123000 | 0.442645000  | 2.420434000  |
| 1 | -3.228305000 | 1.391262000  | 1.880152000  |
| 1 | 0.104876000  | -0.777558000 | 0.611799000  |
| 6 | 2.487876000  | 1.211006000  | 2.307239000  |
| 8 | 3.170280000  | 0.478955000  | 3.314752000  |
| 6 | 2.496537000  | -0.256601000 | 2.291590000  |
| 1 | 1.588733000  | -0.759249000 | 2.621000000  |
| 1 | 1.592485000  | 1.740190000  | 2.633009000  |
| 1 | 3.127710000  | 1.751338000  | 1.610092000  |
| 6 | 3.344317000  | -1.044570000 | 1.351797000  |
| 6 | 2.810875000  | -2.169423000 | 0.721005000  |
| 6 | 4.667548000  | -0.679862000 | 1.094171000  |
| 6 | 3.586014000  | -2.915576000 | -0.162211000 |
| 1 | 1.778536000  | -2.445580000 | 0.909911000  |
| 6 | 5.441617000  | -1.424374000 | 0.209806000  |
| 1 | 5.093198000  | 0.177201000  | 1.607974000  |
| 6 | 4.902756000  | -2.544403000 | -0.421575000 |
| 1 | 3.156725000  | -3.787374000 | -0.646597000 |



|    |              |              |              |
|----|--------------|--------------|--------------|
| 1  | 6.471931000  | -1.137385000 | 0.020827000  |
| 1  | 5.510379000  | -3.130110000 | -1.105012000 |
| 25 | -0.455427000 | -0.205024000 | -0.762932000 |
| 6  | -0.970922000 | 0.316121000  | -2.388211000 |
| 8  | -1.189186000 | 0.590483000  | -3.500366000 |

**E3**

Coordinates (Angstroms)

|    | X            | Y            | Z            |
|----|--------------|--------------|--------------|
| 6  | 1.545452000  | 2.372134000  | -0.262257000 |
| 6  | 2.636687000  | 3.223492000  | -0.386003000 |
| 6  | 3.764247000  | 2.783707000  | -1.069793000 |
| 6  | 3.771027000  | 1.503227000  | -1.602608000 |
| 6  | 2.639757000  | 0.712300000  | -1.452594000 |
| 7  | 1.548710000  | 1.134469000  | -0.807076000 |
| 1  | 4.628704000  | 3.431226000  | -1.168153000 |
| 1  | 2.619366000  | 4.211565000  | 0.057438000  |
| 1  | 4.635896000  | 1.101122000  | -2.115328000 |
| 1  | 2.608554000  | -0.298108000 | -1.841164000 |
| 6  | 0.338419000  | 2.694565000  | 0.532540000  |
| 6  | 0.146401000  | 3.883716000  | 1.224107000  |
| 6  | -0.982664000 | 4.013672000  | 2.024407000  |
| 6  | -1.863061000 | 2.948220000  | 2.144542000  |
| 6  | -1.614016000 | 1.779701000  | 1.428742000  |
| 7  | -0.558687000 | 1.690380000  | 0.603542000  |
| 1  | -1.159297000 | 4.934990000  | 2.569039000  |
| 1  | 0.866616000  | 4.689029000  | 1.157638000  |
| 1  | -2.726700000 | 3.005110000  | 2.797171000  |
| 6  | -2.447809000 | 0.539869000  | 1.597202000  |
| 15 | -2.335407000 | -0.546966000 | 0.095173000  |
| 6  | 0.134302000  | -1.374788000 | -1.579114000 |
| 8  | 0.277805000  | -2.313378000 | -2.239041000 |
| 6  | -3.810055000 | 0.032815000  | -0.951449000 |
| 6  | -3.744486000 | 1.570629000  | -1.032256000 |
| 6  | -3.703129000 | -0.551017000 | -2.370131000 |
| 6  | -5.182457000 | -0.332664000 | -0.368193000 |
| 1  | -3.977778000 | 2.040716000  | -0.072304000 |
| 1  | -2.776706000 | 1.947629000  | -1.367108000 |
| 1  | -4.494034000 | 1.916838000  | -1.752349000 |
| 1  | -3.826439000 | -1.635476000 | -2.382623000 |
| 1  | -4.498280000 | -0.124645000 | -2.992495000 |
| 1  | -2.752024000 | -0.318254000 | -2.851096000 |
| 1  | -5.959913000 | 0.165185000  | -0.959703000 |

|    |              |              |              |
|----|--------------|--------------|--------------|
| 1  | -5.383352000 | -1.405086000 | -0.413191000 |
| 1  | -5.301335000 | 0.001874000  | 0.667382000  |
| 6  | -2.656567000 | -2.286599000 | 0.772705000  |
| 6  | -3.007437000 | -3.230629000 | -0.387756000 |
| 6  | -1.347141000 | -2.787614000 | 1.403050000  |
| 6  | -3.747933000 | -2.347071000 | 1.852887000  |
| 1  | -4.002400000 | -3.043337000 | -0.798167000 |
| 1  | -2.276122000 | -3.168040000 | -1.200088000 |
| 1  | -2.997270000 | -4.262683000 | -0.019607000 |
| 1  | -1.014893000 | -2.163904000 | 2.235815000  |
| 1  | -1.508143000 | -3.796628000 | 1.798550000  |
| 1  | -0.535003000 | -2.842197000 | 0.675242000  |
| 1  | -3.829313000 | -3.379763000 | 2.211158000  |
| 1  | -3.499683000 | -1.729226000 | 2.721152000  |
| 1  | -4.732262000 | -2.050399000 | 1.491542000  |
| 1  | -2.012745000 | -0.028898000 | 2.428534000  |
| 1  | -3.475446000 | 0.782113000  | 1.880563000  |
| 1  | 0.615288000  | -0.911276000 | 0.799486000  |
| 6  | 1.082337000  | -0.537895000 | 1.752943000  |
| 8  | 2.690976000  | -1.053699000 | 3.390296000  |
| 6  | 2.171176000  | -1.543851000 | 2.290268000  |
| 1  | 1.631640000  | -2.538736000 | 2.381169000  |
| 1  | 0.299640000  | -0.412972000 | 2.504816000  |
| 1  | 1.585643000  | 0.415310000  | 1.604337000  |
| 6  | 3.161220000  | -1.749903000 | 1.114750000  |
| 6  | 2.873369000  | -2.535948000 | -0.003292000 |
| 6  | 4.390440000  | -1.095958000 | 1.170601000  |
| 6  | 3.783672000  | -2.652992000 | -1.053303000 |
| 1  | 1.929852000  | -3.077743000 | -0.045261000 |
| 6  | 5.305792000  | -1.203234000 | 0.126657000  |
| 1  | 4.585731000  | -0.528219000 | 2.077018000  |
| 6  | 5.004162000  | -1.979428000 | -0.993847000 |
| 1  | 3.545083000  | -3.274330000 | -1.912988000 |
| 1  | 6.263986000  | -0.692247000 | 0.187199000  |
| 1  | 5.722802000  | -2.075912000 | -1.803537000 |
| 6  | -0.699190000 | 0.892861000  | -2.124247000 |
| 8  | -0.869407000 | 1.430895000  | -3.135061000 |
| 25 | -0.205952000 | 0.103498000  | -0.618954000 |

#### E4

| -----                   |              |             |             |
|-------------------------|--------------|-------------|-------------|
| Coordinates (Angstroms) |              |             |             |
|                         | X            | Y           | Z           |
| -----                   |              |             |             |
| 6                       | -2.440538000 | 1.654354000 | 0.731072000 |

|    |              |              |              |
|----|--------------|--------------|--------------|
| 6  | -3.671614000 | 2.245428000  | 1.002200000  |
| 6  | -4.164528000 | 3.211935000  | 0.135616000  |
| 6  | -3.414352000 | 3.558904000  | -0.980430000 |
| 6  | -2.185840000 | 2.942069000  | -1.173661000 |
| 7  | -1.701191000 | 2.016882000  | -0.340023000 |
| 1  | -5.122415000 | 3.683187000  | 0.328241000  |
| 1  | -4.241991000 | 1.954670000  | 1.876197000  |
| 1  | -3.763200000 | 4.298901000  | -1.691013000 |
| 1  | -1.557687000 | 3.192354000  | -2.020446000 |
| 6  | -1.869084000 | 0.539218000  | 1.522225000  |
| 6  | -2.536174000 | -0.119925000 | 2.548936000  |
| 6  | -1.938013000 | -1.238960000 | 3.116646000  |
| 6  | -0.726057000 | -1.691568000 | 2.618203000  |
| 6  | -0.109735000 | -0.985692000 | 1.585769000  |
| 7  | -0.658923000 | 0.135629000  | 1.099059000  |
| 1  | -2.433983000 | -1.771816000 | 3.921099000  |
| 1  | -3.508211000 | 0.213476000  | 2.890969000  |
| 1  | -0.264176000 | -2.593647000 | 3.002923000  |
| 6  | 1.133955000  | -1.477974000 | 0.906303000  |
| 15 | 2.072401000  | -0.086497000 | 0.117790000  |
| 6  | 0.820579000  | 1.975153000  | -1.897854000 |
| 8  | 1.205418000  | 2.455554000  | -2.880291000 |
| 6  | 3.118264000  | -0.961007000 | -1.206432000 |
| 6  | 2.272250000  | -1.020983000 | -2.492445000 |
| 6  | 4.384518000  | -0.155302000 | -1.535875000 |
| 6  | 3.503485000  | -2.396113000 | -0.811160000 |
| 1  | 1.223172000  | -1.260761000 | -2.299522000 |
| 1  | 2.268826000  | -0.052262000 | -2.999035000 |
| 1  | 2.716434000  | -1.752677000 | -3.179006000 |
| 1  | 5.139478000  | -0.189813000 | -0.746936000 |
| 1  | 4.839537000  | -0.578103000 | -2.439490000 |
| 1  | 4.152588000  | 0.893023000  | -1.751669000 |
| 1  | 4.163908000  | -2.810165000 | -1.582662000 |
| 1  | 4.035352000  | -2.458156000 | 0.140438000  |
| 1  | 2.627302000  | -3.049350000 | -0.756019000 |
| 6  | 3.201750000  | 0.473676000  | 1.542744000  |
| 6  | 3.925114000  | 1.777656000  | 1.165511000  |
| 6  | 2.303205000  | 0.756170000  | 2.762868000  |
| 6  | 4.238396000  | -0.571458000 | 1.980754000  |
| 1  | 4.659351000  | 1.635743000  | 0.370865000  |
| 1  | 3.227901000  | 2.555097000  | 0.847318000  |
| 1  | 4.462907000  | 2.157552000  | 2.042468000  |
| 1  | 1.876017000  | -0.160956000 | 3.179324000  |
| 1  | 2.911292000  | 1.215488000  | 3.550993000  |

|    |              |              |              |
|----|--------------|--------------|--------------|
| 1  | 1.484415000  | 1.441250000  | 2.536923000  |
| 1  | 4.760846000  | -0.201645000 | 2.871450000  |
| 1  | 3.775353000  | -1.525241000 | 2.253358000  |
| 1  | 4.996363000  | -0.763395000 | 1.218862000  |
| 6  | -1.737704000 | -0.810014000 | -1.649881000 |
| 8  | -0.442584000 | -0.368363000 | -1.544901000 |
| 1  | 1.732310000  | -2.109213000 | 1.568372000  |
| 1  | 0.786767000  | -2.093079000 | 0.070148000  |
| 6  | -2.170283000 | -0.853271000 | -3.125297000 |
| 1  | -2.090364000 | 0.151192000  | -3.554515000 |
| 1  | -1.505776000 | -1.514005000 | -3.693458000 |
| 1  | -2.468400000 | -0.153339000 | -1.137416000 |
| 6  | 0.678369000  | 2.637492000  | 0.536223000  |
| 8  | 0.885771000  | 3.637285000  | 1.096493000  |
| 25 | 0.201979000  | 1.216247000  | -0.408714000 |
| 6  | -1.917570000 | -2.191133000 | -1.011583000 |
| 6  | -2.982500000 | -2.469696000 | -0.155142000 |
| 6  | -0.989467000 | -3.207765000 | -1.261863000 |
| 6  | -3.112909000 | -3.717931000 | 0.452941000  |
| 1  | -3.713189000 | -1.690534000 | 0.051979000  |
| 6  | -1.111553000 | -4.455448000 | -0.659552000 |
| 1  | -0.158038000 | -3.002236000 | -1.931016000 |
| 6  | -2.173086000 | -4.714508000 | 0.208262000  |
| 1  | -3.944294000 | -3.908357000 | 1.126391000  |
| 1  | -0.376845000 | -5.229545000 | -0.864724000 |
| 1  | -2.267573000 | -5.686191000 | 0.684186000  |
| 1  | -3.200772000 | -1.209419000 | -3.248825000 |

## E5

-----  
Coordinates (Angstroms)

|   | X           | Y            | Z            |
|---|-------------|--------------|--------------|
| 6 | 2.102806000 | -1.426334000 | 0.911485000  |
| 6 | 3.418951000 | -1.848729000 | 1.097998000  |
| 6 | 4.001418000 | -2.685274000 | 0.159316000  |
| 6 | 3.250155000 | -3.071867000 | -0.946427000 |
| 6 | 1.948599000 | -2.611200000 | -1.064896000 |
| 7 | 1.374116000 | -1.806655000 | -0.159194000 |
| 1 | 5.022720000 | -3.027210000 | 0.287588000  |
| 1 | 3.981142000 | -1.524919000 | 1.964108000  |
| 1 | 3.657966000 | -3.727235000 | -1.707595000 |
| 1 | 1.328889000 | -2.890624000 | -1.908377000 |
| 6 | 1.379863000 | -0.561900000 | 1.859308000  |
| 6 | 1.956517000 | 0.041182000  | 2.974776000  |

|    |              |              |              |
|----|--------------|--------------|--------------|
| 6  | 1.154570000  | 0.811611000  | 3.804154000  |
| 6  | -0.197027000 | 0.945867000  | 3.508603000  |
| 6  | -0.711137000 | 0.329129000  | 2.372106000  |
| 7  | 0.079895000  | -0.386849000 | 1.552083000  |
| 1  | 1.579304000  | 1.300402000  | 4.674656000  |
| 1  | 3.015450000  | -0.063466000 | 3.173495000  |
| 1  | -0.852810000 | 1.530448000  | 4.144563000  |
| 6  | -2.164024000 | 0.405066000  | 1.991893000  |
| 15 | -2.333430000 | 0.214602000  | 0.147312000  |
| 6  | -0.820384000 | -1.390065000 | -1.965762000 |
| 8  | -0.966535000 | -1.508718000 | -3.116945000 |
| 6  | -2.210037000 | 2.016493000  | -0.461089000 |
| 6  | -0.968093000 | 2.640682000  | 0.202313000  |
| 6  | -1.983892000 | 2.009155000  | -1.981191000 |
| 6  | -3.408124000 | 2.910928000  | -0.118959000 |
| 1  | -1.124752000 | 2.830182000  | 1.269288000  |
| 1  | -0.090680000 | 2.003420000  | 0.069824000  |
| 1  | -0.764459000 | 3.608825000  | -0.271402000 |
| 1  | -2.824471000 | 1.577532000  | -2.529826000 |
| 1  | -1.857527000 | 3.040754000  | -2.333648000 |
| 1  | -1.082250000 | 1.447215000  | -2.233961000 |
| 1  | -3.171890000 | 3.944772000  | -0.400433000 |
| 1  | -4.315416000 | 2.632780000  | -0.659661000 |
| 1  | -3.628509000 | 2.914156000  | 0.953808000  |
| 6  | -4.135008000 | -0.370476000 | -0.042955000 |
| 6  | -4.595490000 | -0.164243000 | -1.494167000 |
| 6  | -4.156937000 | -1.881719000 | 0.233851000  |
| 6  | -5.132378000 | 0.290859000  | 0.922185000  |
| 1  | -4.756557000 | 0.888343000  | -1.738744000 |
| 1  | -3.878819000 | -0.580752000 | -2.209542000 |
| 1  | -5.550659000 | -0.681436000 | -1.645626000 |
| 1  | -3.763262000 | -2.133961000 | 1.223000000  |
| 1  | -5.193910000 | -2.236534000 | 0.191765000  |
| 1  | -3.580675000 | -2.433804000 | -0.510611000 |
| 1  | -6.124865000 | -0.147505000 | 0.760204000  |
| 1  | -4.871914000 | 0.108018000  | 1.969413000  |
| 1  | -5.227842000 | 1.366531000  | 0.777592000  |
| 6  | 3.524523000  | 1.910090000  | 0.492782000  |
| 8  | 4.373625000  | 1.154917000  | 0.937994000  |
| 1  | -2.675599000 | -0.457169000 | 2.437656000  |
| 6  | 2.989026000  | 3.047910000  | 1.332912000  |
| 1  | 1.903428000  | 2.961836000  | 1.448394000  |
| 1  | 3.465233000  | 3.021779000  | 2.313248000  |
| 1  | -2.634778000 | 1.305089000  | 2.398321000  |

|    |              |              |              |
|----|--------------|--------------|--------------|
| 1  | 0.131856000  | 0.175254000  | -0.888171000 |
| 6  | -1.156476000 | -2.677833000 | 0.344536000  |
| 8  | -1.457656000 | -3.754334000 | 0.676859000  |
| 25 | -0.532960000 | -1.115672000 | -0.247578000 |
| 6  | 2.969087000  | 1.718005000  | -0.881493000 |
| 6  | 2.108386000  | 2.647568000  | -1.472912000 |
| 6  | 3.298021000  | 0.551716000  | -1.579084000 |
| 6  | 1.577005000  | 2.408134000  | -2.734586000 |
| 1  | 1.840620000  | 3.559699000  | -0.950272000 |
| 6  | 2.753132000  | 0.304449000  | -2.830920000 |
| 1  | 3.971043000  | -0.159622000 | -1.113255000 |
| 6  | 1.887823000  | 1.230769000  | -3.409082000 |
| 1  | 0.902791000  | 3.130954000  | -3.182502000 |
| 1  | 2.992387000  | -0.616648000 | -3.353058000 |
| 1  | 1.449059000  | 1.032084000  | -4.381879000 |
| 1  | 3.196378000  | 4.013388000  | 0.859751000  |

### F3

| -----                   |              |              |              |
|-------------------------|--------------|--------------|--------------|
| Coordinates (Angstroms) |              |              |              |
|                         | X            | Y            | Z            |
| -----                   |              |              |              |
| 6                       | 2.096595000  | -1.127482000 | 1.061072000  |
| 6                       | 3.405847000  | -1.439368000 | 1.406022000  |
| 6                       | 4.104024000  | -0.580967000 | 2.245686000  |
| 6                       | 3.470500000  | 0.555948000  | 2.724044000  |
| 6                       | 2.163236000  | 0.806286000  | 2.329178000  |
| 7                       | 1.490530000  | -0.006940000 | 1.507183000  |
| 1                       | 5.133160000  | -0.796289000 | 2.511287000  |
| 1                       | 3.888912000  | -2.319201000 | 1.001608000  |
| 1                       | 3.974688000  | 1.255999000  | 3.378958000  |
| 1                       | 1.635859000  | 1.687593000  | 2.670492000  |
| 6                       | 1.281841000  | -1.947239000 | 0.138034000  |
| 6                       | 1.675628000  | -3.179152000 | -0.369446000 |
| 6                       | 0.866686000  | -3.800388000 | -1.311885000 |
| 6                       | -0.291561000 | -3.167565000 | -1.741553000 |
| 6                       | -0.642103000 | -1.942393000 | -1.180743000 |
| 7                       | 0.115527000  | -1.377694000 | -0.225059000 |
| 1                       | 1.150314000  | -4.762878000 | -1.723951000 |
| 1                       | 2.597986000  | -3.643848000 | -0.046139000 |
| 1                       | -0.921770000 | -3.609186000 | -2.504794000 |
| 6                       | -1.822622000 | -1.149849000 | -1.665976000 |
| 15                      | -2.430270000 | 0.026775000  | -0.363371000 |
| 6                       | -0.855691000 | 1.825624000  | 1.660525000  |
| 8                       | -1.199168000 | 2.767158000  | 2.232193000  |

|   |              |              |              |
|---|--------------|--------------|--------------|
| 6 | -3.819961000 | -0.946260000 | 0.482139000  |
| 6 | -3.271876000 | -2.349769000 | 0.805676000  |
| 6 | -4.218705000 | -0.236689000 | 1.786650000  |
| 6 | -5.075416000 | -1.135046000 | -0.380144000 |
| 1 | -3.151333000 | -2.954891000 | -0.098255000 |
| 1 | -2.315108000 | -2.331683000 | 1.329704000  |
| 1 | -3.988193000 | -2.869788000 | 1.451193000  |
| 1 | -4.647466000 | 0.751476000  | 1.607015000  |
| 1 | -4.980564000 | -0.834947000 | 2.299765000  |
| 1 | -3.380210000 | -0.117239000 | 2.474005000  |
| 1 | -5.754464000 | -1.824259000 | 0.135402000  |
| 1 | -5.620049000 | -0.200631000 | -0.531002000 |
| 1 | -4.850012000 | -1.572504000 | -1.357830000 |
| 6 | -3.136337000 | 1.453751000  | -1.382467000 |
| 6 | -4.000536000 | 2.348002000  | -0.480928000 |
| 6 | -1.933819000 | 2.277161000  | -1.869424000 |
| 6 | -3.940564000 | 1.022259000  | -2.619641000 |
| 1 | -4.949654000 | 1.875592000  | -0.215100000 |
| 1 | -3.479540000 | 2.628896000  | 0.439703000  |
| 1 | -4.236301000 | 3.274306000  | -1.016529000 |
| 1 | -1.267674000 | 1.698027000  | -2.515710000 |
| 1 | -2.296934000 | 3.125999000  | -2.459449000 |
| 1 | -1.338370000 | 2.678885000  | -1.046182000 |
| 1 | -4.231113000 | 1.921884000  | -3.174304000 |
| 1 | -3.348066000 | 0.405583000  | -3.302473000 |
| 1 | -4.855950000 | 0.482431000  | -2.378162000 |
| 1 | -1.470032000 | -0.536264000 | -2.503939000 |
| 1 | -2.606993000 | -1.800545000 | -2.061223000 |
| 1 | 0.587500000  | 1.117884000  | -0.888556000 |
| 6 | 1.388704000  | 1.795302000  | -1.289575000 |
| 8 | 2.384198000  | 3.948816000  | -0.878188000 |
| 6 | 1.519931000  | 3.078156000  | -0.409193000 |
| 1 | 0.448900000  | 3.447093000  | -0.292240000 |
| 1 | 1.021497000  | 2.095172000  | -2.280377000 |
| 6 | 2.652371000  | 0.982963000  | -1.450421000 |
| 6 | 2.634767000  | -0.249208000 | -2.113290000 |
| 6 | 3.870834000  | 1.442378000  | -0.934501000 |
| 6 | 3.786511000  | -1.024477000 | -2.230297000 |
| 1 | 1.701252000  | -0.612307000 | -2.540518000 |
| 6 | 5.021551000  | 0.667388000  | -1.047261000 |
| 1 | 3.875042000  | 2.447802000  | -0.516358000 |
| 6 | 4.986109000  | -0.571073000 | -1.687709000 |
| 1 | 3.745465000  | -1.979809000 | -2.746983000 |
| 1 | 5.958790000  | 1.040605000  | -0.642638000 |

|    |              |              |              |
|----|--------------|--------------|--------------|
| 1  | 5.890249000  | -1.166606000 | -1.781187000 |
| 1  | 1.736694000  | 2.671944000  | 0.633803000  |
| 25 | -0.427949000 | 0.270277000  | 0.844789000  |
| 6  | -0.941717000 | -0.576870000 | 2.305547000  |
| 8  | -1.133968000 | -1.107093000 | 3.316773000  |

**F4**

Coordinates (Angstroms)

|    | X            | Y            | Z            |
|----|--------------|--------------|--------------|
| 6  | 1.532855000  | -2.109274000 | -0.039226000 |
| 6  | 2.567813000  | -3.033758000 | -0.157690000 |
| 6  | 3.303657000  | -3.080888000 | -1.333757000 |
| 6  | 2.985290000  | -2.199650000 | -2.360167000 |
| 6  | 1.935549000  | -1.311954000 | -2.171533000 |
| 7  | 1.220124000  | -1.260157000 | -1.041326000 |
| 1  | 4.109850000  | -3.797897000 | -1.445855000 |
| 1  | 2.790888000  | -3.714616000 | 0.654800000  |
| 1  | 3.532128000  | -2.194976000 | -3.295570000 |
| 1  | 1.642687000  | -0.615830000 | -2.948945000 |
| 6  | 0.717461000  | -1.942118000 | 1.185305000  |
| 6  | 1.003587000  | -2.543092000 | 2.407184000  |
| 6  | 0.225014000  | -2.206455000 | 3.507388000  |
| 6  | -0.772451000 | -1.250863000 | 3.369861000  |
| 6  | -0.999649000 | -0.678786000 | 2.119138000  |
| 7  | -0.301574000 | -1.077764000 | 1.046534000  |
| 1  | 0.416104000  | -2.665303000 | 4.471770000  |
| 1  | 1.825363000  | -3.241759000 | 2.506571000  |
| 1  | -1.363385000 | -0.932516000 | 4.221495000  |
| 6  | -1.958352000 | 0.458795000  | 1.918099000  |
| 15 | -2.552423000 | 0.540940000  | 0.162342000  |
| 6  | -0.566045000 | 0.750317000  | -2.283590000 |
| 8  | -0.540976000 | 1.408393000  | -3.238267000 |
| 6  | -3.150979000 | 2.336264000  | -0.004197000 |
| 6  | -1.931896000 | 3.201551000  | -0.375630000 |
| 6  | -4.169274000 | 2.465031000  | -1.147125000 |
| 6  | -3.754780000 | 2.891159000  | 1.296470000  |
| 1  | -1.047820000 | 2.969020000  | 0.222789000  |
| 1  | -1.643824000 | 3.043278000  | -1.417586000 |
| 1  | -2.201915000 | 4.258676000  | -0.259688000 |
| 1  | -5.144080000 | 2.034966000  | -0.905090000 |
| 1  | -4.327410000 | 3.529459000  | -1.357266000 |
| 1  | -3.802357000 | 2.001704000  | -2.069233000 |
| 1  | -4.129094000 | 3.904756000  | 1.108643000  |



|    |              |              |              |
|----|--------------|--------------|--------------|
| 1  | -4.591037000 | 2.300826000  | 1.674613000  |
| 1  | -3.004367000 | 2.969172000  | 2.088441000  |
| 6  | -4.055632000 | -0.625357000 | 0.182027000  |
| 6  | -4.560673000 | -0.862654000 | -1.251460000 |
| 6  | -3.584576000 | -1.973474000 | 0.761079000  |
| 6  | -5.228635000 | -0.146432000 | 1.049664000  |
| 1  | -5.017522000 | 0.028111000  | -1.685062000 |
| 1  | -3.765719000 | -1.193991000 | -1.921859000 |
| 1  | -5.327544000 | -1.646460000 | -1.235765000 |
| 1  | -3.351537000 | -1.899998000 | 1.827673000  |
| 1  | -4.393114000 | -2.706481000 | 0.657350000  |
| 1  | -2.708998000 | -2.373363000 | 0.246769000  |
| 1  | -5.991282000 | -0.934171000 | 1.080184000  |
| 1  | -4.928798000 | 0.052512000  | 2.083665000  |
| 1  | -5.710327000 | 0.749284000  | 0.652202000  |
| 6  | 1.587437000  | 1.338679000  | 0.608338000  |
| 8  | 0.283307000  | 1.337043000  | 0.209035000  |
| 1  | -2.751557000 | 0.458286000  | 2.669875000  |
| 1  | -1.358378000 | 1.369024000  | 2.027796000  |
| 6  | 2.564107000  | 1.845378000  | -0.479731000 |
| 1  | 2.394814000  | 1.251176000  | -1.384212000 |
| 1  | 2.302458000  | 2.880901000  | -0.722759000 |
| 6  | 3.998264000  | 1.741190000  | -0.039617000 |
| 6  | 4.670076000  | 2.829251000  | 0.525361000  |
| 6  | 4.669933000  | 0.514777000  | -0.105277000 |
| 6  | 5.973735000  | 2.701833000  | 0.999485000  |
| 1  | 4.163112000  | 3.788874000  | 0.591997000  |
| 6  | 5.972439000  | 0.381464000  | 0.365423000  |
| 1  | 4.160142000  | -0.344075000 | -0.535506000 |
| 6  | 6.630778000  | 1.476756000  | 0.921011000  |
| 1  | 6.476528000  | 3.562428000  | 1.431633000  |
| 1  | 6.475593000  | -0.579177000 | 0.297370000  |
| 1  | 7.647565000  | 1.375698000  | 1.288968000  |
| 1  | 1.965177000  | 0.344594000  | 0.937206000  |
| 1  | 1.727806000  | 1.993395000  | 1.494279000  |
| 6  | -1.278053000 | -1.606365000 | -1.654895000 |
| 8  | -1.629860000 | -2.522358000 | -2.282187000 |
| 25 | -0.563017000 | -0.229071000 | -0.796143000 |

**F5**

| -----                   |              |              |             |
|-------------------------|--------------|--------------|-------------|
| Coordinates (Angstroms) |              |              |             |
|                         | X            | Y            | Z           |
| -----                   |              |              |             |
| 6                       | -1.592996000 | -1.949928000 | 0.606685000 |

|    |              |              |              |
|----|--------------|--------------|--------------|
| 6  | -2.889613000 | -2.428019000 | 0.798163000  |
| 6  | -3.556302000 | -2.129709000 | 1.976734000  |
| 6  | -2.902763000 | -1.367365000 | 2.939233000  |
| 6  | -1.615633000 | -0.924611000 | 2.679494000  |
| 7  | -0.968402000 | -1.191719000 | 1.535401000  |
| 1  | -4.567140000 | -2.487788000 | 2.140141000  |
| 1  | -3.379763000 | -3.006943000 | 0.025858000  |
| 1  | -3.378964000 | -1.111367000 | 3.878477000  |
| 1  | -1.073225000 | -0.321326000 | 3.397332000  |
| 6  | -0.802462000 | -2.194480000 | -0.613336000 |
| 6  | -1.236249000 | -2.954884000 | -1.696567000 |
| 6  | -0.389460000 | -3.104944000 | -2.785516000 |
| 6  | 0.862353000  | -2.503982000 | -2.760531000 |
| 6  | 1.237098000  | -1.754675000 | -1.649326000 |
| 7  | 0.405672000  | -1.598057000 | -0.604059000 |
| 1  | -0.704659000 | -3.685621000 | -3.645914000 |
| 1  | -2.221096000 | -3.402441000 | -1.704563000 |
| 1  | 1.550574000  | -2.607033000 | -3.592336000 |
| 6  | 2.582482000  | -1.093904000 | -1.537849000 |
| 15 | 2.480421000  | 0.342381000  | -0.358777000 |
| 6  | 0.995373000  | 0.820515000  | 2.244241000  |
| 8  | 1.074877000  | 1.687468000  | 3.021117000  |
| 6  | 2.006113000  | 1.792383000  | -1.502052000 |
| 6  | 0.799901000  | 1.347372000  | -2.350796000 |
| 6  | 1.562097000  | 2.987931000  | -0.643961000 |
| 6  | 3.109118000  | 2.237241000  | -2.470947000 |
| 1  | 1.074452000  | 0.592362000  | -3.094354000 |
| 1  | -0.008045000 | 0.959764000  | -1.725626000 |
| 1  | 0.416120000  | 2.216357000  | -2.898246000 |
| 1  | 2.361559000  | 3.373435000  | -0.007079000 |
| 1  | 1.241572000  | 3.804398000  | -1.302593000 |
| 1  | 0.717256000  | 2.714841000  | -0.007804000 |
| 1  | 2.695524000  | 2.977638000  | -3.166721000 |
| 1  | 3.951738000  | 2.712214000  | -1.963227000 |
| 1  | 3.489624000  | 1.407060000  | -3.075217000 |
| 6  | 4.289426000  | 0.547506000  | 0.190223000  |
| 6  | 4.480126000  | 1.930572000  | 0.831646000  |
| 6  | 4.552180000  | -0.504890000 | 1.279392000  |
| 6  | 5.330307000  | 0.338113000  | -0.922239000 |
| 1  | 4.459054000  | 2.738984000  | 0.096865000  |
| 1  | 3.718936000  | 2.131962000  | 1.592323000  |
| 1  | 5.457907000  | 1.967205000  | 1.326794000  |
| 1  | 4.358186000  | -1.525908000 | 0.936859000  |
| 1  | 5.606673000  | -0.452930000 | 1.576545000  |

|    |              |              |              |
|----|--------------|--------------|--------------|
| 1  | 3.942560000  | -0.324240000 | 2.166569000  |
| 1  | 6.333879000  | 0.436007000  | -0.490398000 |
| 1  | 5.266954000  | -0.662733000 | -1.360474000 |
| 1  | 5.254186000  | 1.067764000  | -1.728081000 |
| 6  | -3.939840000 | -0.517829000 | -1.873023000 |
| 8  | -4.185229000 | -1.674090000 | -2.136569000 |
| 1  | 3.277606000  | -1.812651000 | -1.086698000 |
| 6  | -4.833683000 | 0.337106000  | -0.999544000 |
| 1  | -5.706317000 | 0.599750000  | -1.612177000 |
| 1  | -5.208288000 | -0.305895000 | -0.194559000 |
| 6  | -4.174083000 | 1.578950000  | -0.454733000 |
| 6  | -4.763832000 | 2.836473000  | -0.598882000 |
| 6  | -2.952071000 | 1.484287000  | 0.215362000  |
| 6  | -4.152841000 | 3.971345000  | -0.071076000 |
| 1  | -5.711940000 | 2.929034000  | -1.122851000 |
| 6  | -2.337196000 | 2.614998000  | 0.742805000  |
| 1  | -2.462442000 | 0.521989000  | 0.327576000  |
| 6  | -2.938684000 | 3.863085000  | 0.602759000  |
| 1  | -4.626325000 | 4.941459000  | -0.189587000 |
| 1  | -1.387037000 | 2.505242000  | 1.256208000  |
| 1  | -2.462609000 | 4.747443000  | 1.015112000  |
| 1  | 2.980662000  | -0.838657000 | -2.524351000 |
| 1  | -0.053318000 | 0.700821000  | 0.338422000  |
| 1  | -3.039638000 | -0.019267000 | -2.288866000 |
| 6  | 1.730307000  | -1.679990000 | 1.914934000  |
| 8  | 2.216980000  | -2.497012000 | 2.588339000  |
| 25 | 0.838421000  | -0.427646000 | 1.009521000  |

### TSE2-3

Coordinates (Angstroms)

|   | X           | Y            | Z            |
|---|-------------|--------------|--------------|
| 6 | 1.553490000 | 2.319614000  | -0.291974000 |
| 6 | 2.682917000 | 3.128440000  | -0.393489000 |
| 6 | 3.788254000 | 2.662991000  | -1.091165000 |
| 6 | 3.735340000 | 1.397196000  | -1.661360000 |
| 6 | 2.578130000 | 0.646725000  | -1.517984000 |
| 7 | 1.504341000 | 1.090876000  | -0.853070000 |
| 1 | 4.679526000 | 3.275043000  | -1.177686000 |
| 1 | 2.704290000 | 4.103837000  | 0.077385000  |
| 1 | 4.578548000 | 0.977642000  | -2.196064000 |
| 1 | 2.501805000 | -0.350326000 | -1.933380000 |
| 6 | 0.352797000 | 2.683126000  | 0.488426000  |
| 6 | 0.184425000 | 3.887802000  | 1.164803000  |

|    |              |              |              |
|----|--------------|--------------|--------------|
| 6  | -0.950216000 | 4.059929000  | 1.945571000  |
| 6  | -1.855343000 | 3.013414000  | 2.070896000  |
| 6  | -1.629336000 | 1.832261000  | 1.370498000  |
| 7  | -0.573372000 | 1.706186000  | 0.547835000  |
| 1  | -1.113570000 | 4.993865000  | 2.472706000  |
| 1  | 0.923856000  | 4.675256000  | 1.088053000  |
| 1  | -2.724463000 | 3.098533000  | 2.713540000  |
| 6  | -2.478159000 | 0.605900000  | 1.555703000  |
| 15 | -2.340992000 | -0.526704000 | 0.086969000  |
| 6  | 0.110725000  | -1.430591000 | -1.468104000 |
| 8  | 0.318679000  | -2.452776000 | -1.984467000 |
| 6  | -3.850676000 | -0.030342000 | -0.959677000 |
| 6  | -3.807271000 | 1.503640000  | -1.105091000 |
| 6  | -3.735754000 | -0.668396000 | -2.353997000 |
| 6  | -5.216491000 | -0.392880000 | -0.361604000 |
| 1  | -4.052336000 | 2.008649000  | -0.165540000 |
| 1  | -2.838699000 | 1.872888000  | -1.447698000 |
| 1  | -4.556353000 | 1.812360000  | -1.842977000 |
| 1  | -3.854061000 | -1.753440000 | -2.322113000 |
| 1  | -4.528767000 | -0.272474000 | -2.999540000 |
| 1  | -2.780250000 | -0.451052000 | -2.833263000 |
| 1  | -6.003476000 | 0.068307000  | -0.970758000 |
| 1  | -5.401356000 | -1.469536000 | -0.364362000 |
| 1  | -5.339750000 | -0.019450000 | 0.660287000  |
| 6  | -2.636620000 | -2.240086000 | 0.852216000  |
| 6  | -2.948762000 | -3.249223000 | -0.263723000 |
| 6  | -1.330800000 | -2.682131000 | 1.533042000  |
| 6  | -3.745690000 | -2.280875000 | 1.916107000  |
| 1  | -3.944631000 | -3.105127000 | -0.690049000 |
| 1  | -2.213025000 | -3.204111000 | -1.072788000 |
| 1  | -2.917639000 | -4.263083000 | 0.151949000  |
| 1  | -1.032078000 | -2.002380000 | 2.335570000  |
| 1  | -1.483437000 | -3.670746000 | 1.982038000  |
| 1  | -0.502174000 | -2.748475000 | 0.826908000  |
| 1  | -3.797543000 | -3.293900000 | 2.332669000  |
| 1  | -3.540102000 | -1.604586000 | 2.751540000  |
| 1  | -4.732809000 | -2.044024000 | 1.521144000  |
| 1  | -2.055890000 | 0.056823000  | 2.406901000  |
| 1  | -3.507126000 | 0.860893000  | 1.823617000  |
| 1  | 0.388294000  | -0.586583000 | 0.709266000  |
| 6  | 1.252202000  | -0.395177000 | 2.010785000  |
| 8  | 2.478461000  | -0.823397000 | 3.282887000  |
| 6  | 2.149809000  | -1.547369000 | 2.170296000  |
| 1  | 1.632905000  | -2.508557000 | 2.342571000  |

|    |              |              |              |
|----|--------------|--------------|--------------|
| 1  | 0.376935000  | -0.334294000 | 2.643963000  |
| 1  | 1.705478000  | 0.526081000  | 1.673943000  |
| 6  | 3.206352000  | -1.710508000 | 1.101450000  |
| 6  | 3.003743000  | -2.564569000 | 0.016817000  |
| 6  | 4.389201000  | -0.977149000 | 1.179398000  |
| 6  | 3.963688000  | -2.674764000 | -0.985902000 |
| 1  | 2.085981000  | -3.142749000 | -0.046052000 |
| 6  | 5.355896000  | -1.091787000 | 0.183796000  |
| 1  | 4.528546000  | -0.331233000 | 2.041009000  |
| 6  | 5.144572000  | -1.937698000 | -0.904308000 |
| 1  | 3.791181000  | -3.340016000 | -1.827145000 |
| 1  | 6.280167000  | -0.525003000 | 0.257681000  |
| 1  | 5.900284000  | -2.030127000 | -1.679350000 |
| 25 | -0.267316000 | 0.101003000  | -0.666351000 |
| 6  | -0.750150000 | 0.839196000  | -2.210614000 |
| 8  | -0.919003000 | 1.310800000  | -3.260667000 |

#### TSE4-5

| -----                   |              |              |              |
|-------------------------|--------------|--------------|--------------|
| Coordinates (Angstroms) |              |              |              |
|                         | X            | Y            | Z            |
| -----                   |              |              |              |
| 6                       | -2.297713000 | 1.376384000  | 0.481242000  |
| 6                       | -3.554270000 | 1.952481000  | 0.645216000  |
| 6                       | -4.183973000 | 2.528276000  | -0.448166000 |
| 6                       | -3.540584000 | 2.504988000  | -1.679640000 |
| 6                       | -2.280651000 | 1.931044000  | -1.762350000 |
| 7                       | -1.661737000 | 1.381953000  | -0.710025000 |
| 1                       | -5.162951000 | 2.982746000  | -0.340602000 |
| 1                       | -4.037994000 | 1.945422000  | 1.613931000  |
| 1                       | -3.994833000 | 2.933145000  | -2.565532000 |
| 1                       | -1.735708000 | 1.908131000  | -2.698806000 |
| 6                       | -1.578351000 | 0.660382000  | 1.552532000  |
| 6                       | -2.098594000 | 0.399693000  | 2.815502000  |
| 6                       | -1.369069000 | -0.408861000 | 3.677127000  |
| 6                       | -0.172418000 | -0.962285000 | 3.242713000  |
| 6                       | 0.300729000  | -0.650239000 | 1.970244000  |
| 7                       | -0.376222000 | 0.191446000  | 1.173112000  |
| 1                       | -1.748222000 | -0.630362000 | 4.669228000  |
| 1                       | -3.063273000 | 0.791453000  | 3.112566000  |
| 1                       | 0.397933000  | -1.633520000 | 3.874765000  |
| 6                       | 1.535097000  | -1.266473000 | 1.384092000  |
| 15                      | 2.295064000  | -0.126700000 | 0.136428000  |
| 6                       | 0.716044000  | 0.906647000  | -2.375358000 |
| 8                       | 0.985517000  | 0.984343000  | -3.503328000 |

|    |              |              |              |
|----|--------------|--------------|--------------|
| 6  | 3.42224000   | -1.279872000 | -0.865005000 |
| 6  | 4.507535000  | -0.476740000 | -1.596982000 |
| 6  | 4.069254000  | -2.386539000 | -0.016236000 |
| 6  | 2.547172000  | -1.962422000 | -1.925317000 |
| 1  | 4.991740000  | -1.130582000 | -2.331615000 |
| 1  | 4.086291000  | 0.373723000  | -2.143592000 |
| 1  | 5.288768000  | -0.109390000 | -0.927133000 |
| 1  | 3.318280000  | -3.062039000 | 0.403238000  |
| 1  | 4.716640000  | -2.991676000 | -0.662530000 |
| 1  | 4.686161000  | -2.007332000 | 0.799195000  |
| 1  | 3.163429000  | -2.684120000 | -2.476611000 |
| 1  | 1.706346000  | -2.503492000 | -1.480904000 |
| 1  | 2.160422000  | -1.240877000 | -2.647979000 |
| 6  | 3.381862000  | 1.021578000  | 1.204352000  |
| 6  | 3.931463000  | 2.178263000  | 0.352024000  |
| 6  | 2.487645000  | 1.612669000  | 2.310894000  |
| 6  | 4.556811000  | 0.320916000  | 1.902101000  |
| 1  | 4.668773000  | 1.843954000  | -0.379072000 |
| 1  | 3.144958000  | 2.711098000  | -0.184023000 |
| 1  | 4.429471000  | 2.901605000  | 1.008888000  |
| 1  | 2.191696000  | 0.857028000  | 3.044394000  |
| 1  | 3.052376000  | 2.382509000  | 2.849753000  |
| 1  | 1.583005000  | 2.081875000  | 1.920142000  |
| 1  | 5.032326000  | 1.029045000  | 2.591777000  |
| 1  | 4.234784000  | -0.540147000 | 2.496042000  |
| 1  | 5.325772000  | -0.009485000 | 1.200857000  |
| 6  | -0.877238000 | -2.206212000 | -1.202246000 |
| 8  | -0.144912000 | -3.039682000 | -0.604206000 |
| 1  | 2.220130000  | -1.618238000 | 2.160080000  |
| 1  | 1.182654000  | -2.132220000 | 0.800738000  |
| 6  | -0.877598000 | -2.219356000 | -2.733408000 |
| 1  | 0.140094000  | -2.358225000 | -3.097514000 |
| 1  | -1.481165000 | -3.071809000 | -3.068319000 |
| 1  | -0.250836000 | -0.836075000 | -1.068014000 |
| 6  | 0.669530000  | 2.459886000  | -0.365706000 |
| 8  | 0.795078000  | 3.611526000  | -0.264883000 |
| 25 | 0.286032000  | 0.751691000  | -0.662318000 |
| 6  | -2.236153000 | -1.918435000 | -0.564407000 |
| 6  | -2.463160000 | -2.409043000 | 0.721840000  |
| 6  | -3.281753000 | -1.267537000 | -1.224886000 |
| 6  | -3.692110000 | -2.232634000 | 1.348345000  |
| 1  | -1.650810000 | -2.937819000 | 1.208507000  |
| 6  | -4.516332000 | -1.095496000 | -0.605158000 |
| 1  | -3.138665000 | -0.882924000 | -2.228955000 |

|   |              |              |              |
|---|--------------|--------------|--------------|
| 6 | -4.725289000 | -1.572266000 | 0.687047000  |
| 1 | -3.846466000 | -2.618413000 | 2.352256000  |
| 1 | -5.316668000 | -0.584572000 | -1.132743000 |
| 1 | -5.689376000 | -1.439616000 | 1.169639000  |
| 1 | -1.282252000 | -1.306656000 | -3.175243000 |

**TSF2-3**

Coordinates (Angstroms)

|    | X            | Y            | Z            |
|----|--------------|--------------|--------------|
| 6  | -2.688139000 | -1.385477000 | 0.733880000  |
| 6  | -4.014873000 | -1.744875000 | 0.958581000  |
| 6  | -4.780752000 | -2.207388000 | -0.101850000 |
| 6  | -4.197787000 | -2.297729000 | -1.360079000 |
| 6  | -2.867154000 | -1.936156000 | -1.506281000 |
| 7  | -2.119003000 | -1.492085000 | -0.487463000 |
| 1  | -5.818025000 | -2.484327000 | 0.051673000  |
| 1  | -4.449426000 | -1.654791000 | 1.946504000  |
| 1  | -4.757631000 | -2.641426000 | -2.221748000 |
| 1  | -2.371329000 | -1.999130000 | -2.467243000 |
| 6  | -1.810718000 | -0.793673000 | 1.763858000  |
| 6  | -2.209914000 | -0.495832000 | 3.063062000  |
| 6  | -1.323655000 | 0.176953000  | 3.894901000  |
| 6  | -0.092031000 | 0.575459000  | 3.394198000  |
| 6  | 0.246847000  | 0.252723000  | 2.082357000  |
| 7  | -0.582941000 | -0.470012000 | 1.311063000  |
| 1  | -1.604200000 | 0.411948000  | 4.916121000  |
| 1  | -3.194945000 | -0.770585000 | 3.420037000  |
| 1  | 0.599614000  | 1.149552000  | 4.000349000  |
| 6  | 1.492776000  | 0.766155000  | 1.423264000  |
| 15 | 1.979796000  | -0.327969000 | 0.005168000  |
| 6  | 0.180449000  | -1.282643000 | -2.306082000 |
| 8  | 0.389491000  | -1.402597000 | -3.443392000 |
| 6  | 3.166050000  | -1.561706000 | 0.837972000  |
| 6  | 2.428427000  | -2.145331000 | 2.058943000  |
| 6  | 3.497459000  | -2.708491000 | -0.131771000 |
| 6  | 4.477840000  | -0.952076000 | 1.351379000  |
| 1  | 2.301906000  | -1.402125000 | 2.852577000  |
| 1  | 1.445821000  | -2.548863000 | 1.808619000  |
| 1  | 3.024898000  | -2.965004000 | 2.475243000  |
| 1  | 4.126078000  | -2.381220000 | -0.961923000 |
| 1  | 4.049242000  | -3.487729000 | 0.407659000  |
| 1  | 2.602270000  | -3.170203000 | -0.551061000 |
| 1  | 5.016393000  | -1.708254000 | 1.935480000  |

|    |              |              |              |
|----|--------------|--------------|--------------|
| 1  | 5.141946000  | -0.641436000 | 0.541871000  |
| 1  | 4.308320000  | -0.094791000 | 2.010760000  |
| 6  | 2.975347000  | 0.835207000  | -1.113217000 |
| 6  | 3.845716000  | 0.016457000  | -2.078339000 |
| 6  | 1.969622000  | 1.639440000  | -1.950322000 |
| 6  | 3.845623000  | 1.848252000  | -0.350122000 |
| 1  | 4.709834000  | -0.435847000 | -1.585775000 |
| 1  | 3.273911000  | -0.774172000 | -2.575081000 |
| 1  | 4.231232000  | 0.682316000  | -2.859157000 |
| 1  | 1.279574000  | 2.203591000  | -1.321461000 |
| 1  | 2.519996000  | 2.359000000  | -2.569157000 |
| 1  | 1.380154000  | 1.004018000  | -2.612177000 |
| 1  | 4.393506000  | 2.459135000  | -1.077604000 |
| 1  | 3.237845000  | 2.534516000  | 0.247561000  |
| 1  | 4.583835000  | 1.385953000  | 0.305238000  |
| 1  | 1.229471000  | 1.736282000  | 0.981718000  |
| 1  | 2.291513000  | 0.943219000  | 2.148801000  |
| 1  | -0.536416000 | 0.527887000  | -0.952297000 |
| 6  | -1.706367000 | 1.560822000  | -1.281500000 |
| 8  | -2.838562000 | 2.448649000  | -2.525225000 |
| 6  | -1.760921000 | 1.648486000  | -2.745187000 |
| 1  | -0.871862000 | 2.104093000  | -3.224521000 |
| 1  | -2.466967000 | 0.925657000  | -0.847441000 |
| 6  | -1.265444000 | 2.698964000  | -0.434875000 |
| 6  | -1.535683000 | 2.677863000  | 0.935826000  |
| 6  | -0.553929000 | 3.787354000  | -0.954477000 |
| 6  | -1.073403000 | 3.687448000  | 1.776447000  |
| 1  | -2.119251000 | 1.860416000  | 1.348998000  |
| 6  | -0.091929000 | 4.796399000  | -0.118515000 |
| 1  | -0.377924000 | 3.851377000  | -2.022627000 |
| 6  | -0.338035000 | 4.746292000  | 1.253783000  |
| 1  | -1.292410000 | 3.643715000  | 2.839330000  |
| 1  | 0.457036000  | 5.632357000  | -0.541654000 |
| 1  | 0.024881000  | 5.536126000  | 1.904540000  |
| 1  | -1.939269000 | 0.668977000  | -3.231060000 |
| 6  | 0.148033000  | -2.805665000 | -0.273981000 |
| 8  | 0.199936000  | -3.961994000 | -0.159634000 |
| 25 | -0.120023000 | -1.074475000 | -0.570757000 |

-----  
**TSF4-5**  
 -----

Coordinates (Angstroms)

|   | X            | Y           | Z            |
|---|--------------|-------------|--------------|
| 6 | -1.699353000 | 2.309854000 | -0.259559000 |



|    |              |              |              |
|----|--------------|--------------|--------------|
| 6  | -2.825204000 | 3.123968000  | -0.356197000 |
| 6  | -3.961404000 | 2.638145000  | -0.988013000 |
| 6  | -3.942273000 | 1.346690000  | -1.498074000 |
| 6  | -2.784944000 | 0.593791000  | -1.366702000 |
| 7  | -1.680876000 | 1.058357000  | -0.770114000 |
| 1  | -4.848491000 | 3.256866000  | -1.072052000 |
| 1  | -2.819572000 | 4.121881000  | 0.065020000  |
| 1  | -4.808361000 | 0.912493000  | -1.982692000 |
| 1  | -2.733717000 | -0.421788000 | -1.739802000 |
| 6  | -0.463124000 | 2.701299000  | 0.450142000  |
| 6  | -0.276245000 | 3.924907000  | 1.083240000  |
| 6  | 0.902431000  | 4.134416000  | 1.788128000  |
| 6  | 1.826765000  | 3.105530000  | 1.885977000  |
| 6  | 1.572107000  | 1.896914000  | 1.240447000  |
| 7  | 0.474582000  | 1.735206000  | 0.486029000  |
| 1  | 1.082602000  | 5.084563000  | 2.279949000  |
| 1  | -1.030339000 | 4.700296000  | 1.032035000  |
| 1  | 2.733697000  | 3.219829000  | 2.468890000  |
| 6  | 2.438821000  | 0.688855000  | 1.438643000  |
| 15 | 2.248446000  | -0.503355000 | 0.030691000  |
| 6  | -0.340285000 | -1.384107000 | -1.539685000 |
| 8  | -0.639566000 | -2.308028000 | -2.179278000 |
| 6  | 2.541787000  | -2.236564000 | 0.786519000  |
| 6  | 1.673588000  | -3.222877000 | -0.009360000 |
| 6  | 3.986801000  | -2.748210000 | 0.767630000  |
| 6  | 2.069822000  | -2.247623000 | 2.249039000  |
| 1  | 1.884184000  | -4.245229000 | 0.327238000  |
| 1  | 0.612966000  | -3.024422000 | 0.155202000  |
| 1  | 1.866556000  | -3.179301000 | -1.085826000 |
| 1  | 4.669740000  | -2.087971000 | 1.306891000  |
| 1  | 4.011511000  | -3.722027000 | 1.271536000  |
| 1  | 4.365152000  | -2.900788000 | -0.246421000 |
| 1  | 1.967844000  | -3.289802000 | 2.575342000  |
| 1  | 2.803119000  | -1.774213000 | 2.910908000  |
| 1  | 1.112801000  | -1.745180000 | 2.405989000  |
| 6  | 3.705042000  | -0.001947000 | -1.089161000 |
| 6  | 3.594080000  | -0.803687000 | -2.394164000 |
| 6  | 3.545393000  | 1.505205000  | -1.375970000 |
| 6  | 5.123706000  | -0.163528000 | -0.511330000 |
| 1  | 3.720958000  | -1.877481000 | -2.218968000 |
| 1  | 2.629387000  | -0.654964000 | -2.885788000 |
| 1  | 4.378391000  | -0.490548000 | -3.093638000 |
| 1  | 3.830945000  | 2.105851000  | -0.505886000 |
| 1  | 4.217150000  | 1.783773000  | -2.196158000 |

|    |              |              |              |
|----|--------------|--------------|--------------|
| 1  | 2.536270000  | 1.793559000  | -1.665731000 |
| 1  | 5.809299000  | 0.454736000  | -1.103187000 |
| 1  | 5.201280000  | 0.178174000  | 0.526099000  |
| 1  | 5.495577000  | -1.185260000 | -0.565334000 |
| 6  | -1.046718000 | -0.301614000 | 2.203444000  |
| 8  | -0.172604000 | -0.009641000 | 3.038485000  |
| 1  | 3.474867000  | 0.960919000  | 1.657150000  |
| 1  | 2.016458000  | 0.205989000  | 2.325388000  |
| 6  | -1.778735000 | -1.652940000 | 2.314954000  |
| 1  | -1.045978000 | -2.463248000 | 2.272415000  |
| 1  | -2.202905000 | -1.658008000 | 3.327355000  |
| 6  | -2.874873000 | -1.851199000 | 1.306958000  |
| 6  | -2.742428000 | -2.765047000 | 0.259907000  |
| 6  | -4.058357000 | -1.109446000 | 1.394154000  |
| 6  | -3.759343000 | -2.938187000 | -0.675426000 |
| 1  | -1.829121000 | -3.346284000 | 0.176923000  |
| 6  | -5.080416000 | -1.280260000 | 0.464792000  |
| 1  | -4.180694000 | -0.395462000 | 2.205341000  |
| 6  | -4.934498000 | -2.197201000 | -0.574508000 |
| 1  | -3.632776000 | -3.655688000 | -1.480391000 |
| 1  | -5.994690000 | -0.700503000 | 0.554528000  |
| 1  | -5.732039000 | -2.336083000 | -1.298626000 |
| 1  | -0.395796000 | -0.609949000 | 0.787330000  |
| 1  | -1.685478000 | 0.494363000  | 1.767298000  |
| 6  | 0.522562000  | 0.793724000  | -2.241776000 |
| 8  | 0.659121000  | 1.210872000  | -3.319272000 |
| 25 | 0.114110000  | 0.087500000  | -0.662955000 |

**PhCOCH<sub>3</sub>**

Coordinates (Angstroms)

|   | X            | Y            | Z            |
|---|--------------|--------------|--------------|
| 6 | -1.696878000 | -0.202772000 | -0.000033000 |
| 8 | -2.208180000 | -1.307740000 | -0.000014000 |
| 6 | -0.203879000 | -0.055787000 | -0.000114000 |
| 6 | 0.428234000  | 1.191445000  | -0.000064000 |
| 6 | 0.575304000  | -1.217502000 | -0.000008000 |
| 6 | 1.816919000  | 1.273976000  | -0.000030000 |
| 1 | -0.155649000 | 2.106379000  | -0.000086000 |
| 6 | 1.960961000  | -1.134858000 | 0.000033000  |
| 1 | 0.072068000  | -2.178456000 | 0.000019000  |
| 6 | 2.583801000  | 0.112063000  | 0.000059000  |
| 1 | 2.300434000  | 2.245548000  | 0.000025000  |
| 1 | 2.557432000  | -2.041734000 | 0.000078000  |

|   |              |             |              |
|---|--------------|-------------|--------------|
| 1 | 3.667466000  | 0.178575000 | 0.000126000  |
| 6 | -2.547867000 | 1.046008000 | 0.000086000  |
| 1 | -3.600108000 | 0.760850000 | 0.000269000  |
| 1 | -2.337720000 | 1.657637000 | 0.883500000  |
| 1 | -2.338058000 | 1.657674000 | -0.883395000 |

---
